# Supplementary material for: An emerging coral disease outbreak decimated Caribbean coral populations and reshaped reef functionality
Source: Research Square preprint supplement (doi:10.21203/rs.3.rs-734716/v1), 2021-11-04
Supplement: Supplementary file 1 [file 2a55f0f94f43d4fca23116de.xlsx]

## Sheet: Hoja1
Data S1
Period	Temporal replication	MPA	MPA Year	Site	Year	No. Transects	Area (m2)	Susceptible species	Family/Subfamily	Group Species	Healthy	SCTLD	Dead
Pre	Yes	RBCM	2016	Akumal Langosta	2016	2	20	No	Acroporidae	Acropora cervicornis	0	0	0
Pre	Yes	RBCM	2016	Akumal Langosta	2016	2	20	No	Acroporidae	Acropora palmata	0	0	0
Pre	Yes	RBCM	2016	Akumal Langosta	2016	2	20	No	Acroporidae	Acropora cervicornis	0	0	0
Pre	Yes	RBCM	2016	Akumal Langosta	2016	2	20	No	Agariciidae	Agaricia (encrusting)	11	0	0
Pre	Yes	RBCM	2016	Akumal Langosta	2016	2	20	No	Agariciidae	Agaricia (encrusting)	0	0	0
Pre	Yes	RBCM	2016	Akumal Langosta	2016	2	20	No	Agariciidae	Agaricia (encrusting)	0	0	0
Pre	Yes	RBCM	2016	Akumal Langosta	2016	2	20	No	Agariciidae	Agaricia (encrusting)	0	0	0
Pre	Yes	RBCM	2016	Akumal Langosta	2016	2	20	No	Agariciidae	Agaricia (encrusting)	0	0	0
Pre	Yes	RBCM	2016	Akumal Langosta	2016	2	20	No	Agariciidae	Agaricia (encrusting)	0	0	0
Pre	Yes	RBCM	2016	Akumal Langosta	2016	2	20	No	Agariciidae	Agaricia tenuifolia	4	0	0
Pre	Yes	RBCM	2016	Akumal Langosta	2016	2	20	Yes	Faviinae	Colpophyllia natans	0	0	0
Pre	Yes	RBCM	2016	Akumal Langosta	2016	2	20	Yes	Meandrinidae	Dendrogyra cylindrus	0	0	0
Pre	Yes	RBCM	2016	Akumal Langosta	2016	2	20	Yes	Meandrinidae	Dichocoenia stokesi	1.5	0	0
Pre	Yes	RBCM	2016	Akumal Langosta	2016	2	20	Yes	Faviinae	Diploria labyrinthiformis	0.5	0	0
Pre	Yes	RBCM	2016	Akumal Langosta	2016	2	20	Yes	Meandrinidae	Eusmilia fastigiata	0	0	0
Pre	Yes	RBCM	2016	Akumal Langosta	2016	2	20	No	Faviinae	Favia fragum	0	0	0
Pre	Yes	RBCM	2016	Akumal Langosta	2016	2	20	No	Agariciidae	Helioseris cucullata	0	0	0
Pre	Yes	RBCM	2016	Akumal Langosta	2016	2	20	Yes	Mussinae	Isophyllia spp.	0	0	0
Pre	Yes	RBCM	2016	Akumal Langosta	2016	2	20	Yes	Mussinae	Isophyllia spp.	0	0	0
Pre	Yes	RBCM	2016	Akumal Langosta	2016	2	20	Yes	Mussinae	Isophyllia spp.	0	0	0
Pre	Yes	RBCM	2016	Akumal Langosta	2016	2	20	No	Pocilloporidae	Madracis spp.	0	0	0
Pre	Yes	RBCM	2016	Akumal Langosta	2016	2	20	No	Pocilloporidae	Madracis spp.	0.5	0	0
Pre	Yes	RBCM	2016	Akumal Langosta	2016	2	20	Yes	Meandrinidae	Meandrina spp.	0	0	0
Pre	Yes	RBCM	2016	Akumal Langosta	2016	2	20	Yes	Meandrinidae	Meandrina spp.	0.5	0	0
Pre	Yes	RBCM	2016	Akumal Langosta	2016	2	20	Yes	Meandrinidae	Meandrina spp.	0	0	0
Pre	Yes	RBCM	2016	Akumal Langosta	2016	2	20	Yes	Montastraeidae	Montastraea cavernosa	1.5	0	0
Pre	Yes	RBCM	2016	Akumal Langosta	2016	2	20	No	Mussinae	Mussa angulosa	0	0	0
Pre	Yes	RBCM	2016	Akumal Langosta	2016	2	20	Yes	Mussinae	Mycetophyllia spp.	0	0	0
Pre	Yes	RBCM	2016	Akumal Langosta	2016	2	20	Yes	Mussinae	Mycetophyllia spp.	0	0	0
Pre	Yes	RBCM	2016	Akumal Langosta	2016	2	20	Yes	Mussinae	Mycetophyllia spp.	0	0	0
Pre	Yes	RBCM	2016	Akumal Langosta	2016	2	20	Yes	Mussinae	Mycetophyllia spp.	0	0	0
Pre	Yes	RBCM	2016	Akumal Langosta	2016	2	20	Yes	Mussinae	Mycetophyllia spp.	0.5	0	0
Pre	Yes	RBCM	2016	Akumal Langosta	2016	2	20	Yes	Merulinidae	Orbicella annularis	0	0	0
Pre	Yes	RBCM	2016	Akumal Langosta	2016	2	20	Yes	Merulinidae	Orbicella faveolata	3	0.5	0
Pre	Yes	RBCM	2016	Akumal Langosta	2016	2	20	Yes	Merulinidae	Orbicella franksi	0	0	0
Pre	Yes	RBCM	2016	Akumal Langosta	2016	2	20	No	Poritidae	Porites astreoides	10.5	0	0
Pre	Yes	RBCM	2016	Akumal Langosta	2016	2	20	No	Poritidae	Branching Porites	0	0	0
Pre	Yes	RBCM	2016	Akumal Langosta	2016	2	20	No	Poritidae	Branching Porites	0	0	0
Pre	Yes	RBCM	2016	Akumal Langosta	2016	2	20	No	Poritidae	Branching Porites	2.5	0	0
Pre	Yes	RBCM	2016	Akumal Langosta	2016	2	20	No	Poritidae	Branching Porites	0	0	0
Pre	Yes	RBCM	2016	Akumal Langosta	2016	2	20	Yes	Faviinae	Pseudodiploria clivosa	0	0	0
Pre	Yes	RBCM	2016	Akumal Langosta	2016	2	20	Yes	Faviinae	Pseudodiploria strigosa	1	0	0
Pre	Yes	RBCM	2016	Akumal Langosta	2016	2	20	No	Mussinae	Scolymia spp.	0	0	0
Pre	Yes	RBCM	2016	Akumal Langosta	2016	2	20	No	Mussinae	Scolymia spp.	0	0	0
Pre	Yes	RBCM	2016	Akumal Langosta	2016	2	20	No	Siderastreidae	Siderastrea radians	2	0	0
Pre	Yes	RBCM	2016	Akumal Langosta	2016	2	20	Yes	Siderastreidae	Siderastrea siderea	8.5	0	0
Pre	Yes	RBCM	2016	Akumal Langosta	2016	2	20	No	Scleractinia incertae sedis	Solenastrea bournoni	0	0	0
Pre	Yes	RBCM	2016	Akumal Langosta	2016	2	20	No	Astrocoeniidae	Stephanocoenia intersepta	1.5	0	0
Pre	Yes	PNAX	2000	Bacalar Chico	2016	2	28	No	Acroporidae	Acropora cervicornis	0	0	0
Pre	Yes	PNAX	2000	Bacalar Chico	2016	2	28	No	Acroporidae	Acropora palmata	0	0	0
Pre	Yes	PNAX	2000	Bacalar Chico	2016	2	28	No	Acroporidae	Acropora cervicornis	0	0	0
Pre	Yes	PNAX	2000	Bacalar Chico	2016	2	28	No	Agariciidae	Agaricia (encrusting)	16.4286	0	0
Pre	Yes	PNAX	2000	Bacalar Chico	2016	2	28	No	Agariciidae	Agaricia (encrusting)	0	0	0
Pre	Yes	PNAX	2000	Bacalar Chico	2016	2	28	No	Agariciidae	Agaricia (encrusting)	0	0	0
Pre	Yes	PNAX	2000	Bacalar Chico	2016	2	28	No	Agariciidae	Agaricia (encrusting)	0	0	0
Pre	Yes	PNAX	2000	Bacalar Chico	2016	2	28	No	Agariciidae	Agaricia (encrusting)	0	0	0
Pre	Yes	PNAX	2000	Bacalar Chico	2016	2	28	No	Agariciidae	Agaricia (encrusting)	0	0	0
Pre	Yes	PNAX	2000	Bacalar Chico	2016	2	28	No	Agariciidae	Agaricia tenuifolia	0.714286	0	0
Pre	Yes	PNAX	2000	Bacalar Chico	2016	2	28	Yes	Faviinae	Colpophyllia natans	0	0	0
Pre	Yes	PNAX	2000	Bacalar Chico	2016	2	28	Yes	Meandrinidae	Dendrogyra cylindrus	0	0	0
Pre	Yes	PNAX	2000	Bacalar Chico	2016	2	28	Yes	Meandrinidae	Dichocoenia stokesi	2.14286	0	0
Pre	Yes	PNAX	2000	Bacalar Chico	2016	2	28	Yes	Faviinae	Diploria labyrinthiformis	0.357143	0	0
Pre	Yes	PNAX	2000	Bacalar Chico	2016	2	28	Yes	Meandrinidae	Eusmilia fastigiata	0	0	0
Pre	Yes	PNAX	2000	Bacalar Chico	2016	2	28	No	Faviinae	Favia fragum	0	0	0
Pre	Yes	PNAX	2000	Bacalar Chico	2016	2	28	No	Agariciidae	Helioseris cucullata	0.357143	0	0
Pre	Yes	PNAX	2000	Bacalar Chico	2016	2	28	Yes	Mussinae	Isophyllia spp.	0	0	0
Pre	Yes	PNAX	2000	Bacalar Chico	2016	2	28	Yes	Mussinae	Isophyllia spp.	0	0	0
Pre	Yes	PNAX	2000	Bacalar Chico	2016	2	28	Yes	Mussinae	Isophyllia spp.	0	0	0
Pre	Yes	PNAX	2000	Bacalar Chico	2016	2	28	No	Pocilloporidae	Madracis spp.	0	0	0
Pre	Yes	PNAX	2000	Bacalar Chico	2016	2	28	No	Pocilloporidae	Madracis spp.	0	0	0
Pre	Yes	PNAX	2000	Bacalar Chico	2016	2	28	Yes	Meandrinidae	Meandrina spp.	0	0	0
Pre	Yes	PNAX	2000	Bacalar Chico	2016	2	28	Yes	Meandrinidae	Meandrina spp.	0.714286	0	0
Pre	Yes	PNAX	2000	Bacalar Chico	2016	2	28	Yes	Meandrinidae	Meandrina spp.	0	0	0
Pre	Yes	PNAX	2000	Bacalar Chico	2016	2	28	Yes	Montastraeidae	Montastraea cavernosa	3.57143	0	0
Pre	Yes	PNAX	2000	Bacalar Chico	2016	2	28	No	Mussinae	Mussa angulosa	0	0	0
Pre	Yes	PNAX	2000	Bacalar Chico	2016	2	28	Yes	Mussinae	Mycetophyllia spp.	0	0	0
Pre	Yes	PNAX	2000	Bacalar Chico	2016	2	28	Yes	Mussinae	Mycetophyllia spp.	0	0	0
Pre	Yes	PNAX	2000	Bacalar Chico	2016	2	28	Yes	Mussinae	Mycetophyllia spp.	0	0	0
Pre	Yes	PNAX	2000	Bacalar Chico	2016	2	28	Yes	Mussinae	Mycetophyllia spp.	0	0	0
Pre	Yes	PNAX	2000	Bacalar Chico	2016	2	28	Yes	Mussinae	Mycetophyllia spp.	0	0	0
Pre	Yes	PNAX	2000	Bacalar Chico	2016	2	28	Yes	Merulinidae	Orbicella annularis	0	0	0
Pre	Yes	PNAX	2000	Bacalar Chico	2016	2	28	Yes	Merulinidae	Orbicella faveolata	2.5	0	0
Pre	Yes	PNAX	2000	Bacalar Chico	2016	2	28	Yes	Merulinidae	Orbicella franksi	0	0	0
Pre	Yes	PNAX	2000	Bacalar Chico	2016	2	28	No	Poritidae	Porites astreoides	5	0	0
Pre	Yes	PNAX	2000	Bacalar Chico	2016	2	28	No	Poritidae	Branching Porites	0	0	0
Pre	Yes	PNAX	2000	Bacalar Chico	2016	2	28	No	Poritidae	Branching Porites	0	0	0
Pre	Yes	PNAX	2000	Bacalar Chico	2016	2	28	No	Poritidae	Branching Porites	0	0	0
Pre	Yes	PNAX	2000	Bacalar Chico	2016	2	28	No	Poritidae	Branching Porites	0	0	0
Pre	Yes	PNAX	2000	Bacalar Chico	2016	2	28	Yes	Faviinae	Pseudodiploria clivosa	0	0	0
Pre	Yes	PNAX	2000	Bacalar Chico	2016	2	28	Yes	Faviinae	Pseudodiploria strigosa	1.07143	0	0
Pre	Yes	PNAX	2000	Bacalar Chico	2016	2	28	No	Mussinae	Scolymia spp.	0	0	0
Pre	Yes	PNAX	2000	Bacalar Chico	2016	2	28	No	Mussinae	Scolymia spp.	0	0	0
Pre	Yes	PNAX	2000	Bacalar Chico	2016	2	28	No	Siderastreidae	Siderastrea radians	0.357143	0	0
Pre	Yes	PNAX	2000	Bacalar Chico	2016	2	28	Yes	Siderastreidae	Siderastrea siderea	7.14286	0	0
Pre	Yes	PNAX	2000	Bacalar Chico	2016	2	28	No	Scleractinia incertae sedis	Solenastrea bournoni	0	0	0
Pre	Yes	PNAX	2000	Bacalar Chico	2016	2	28	No	Astrocoeniidae	Stephanocoenia intersepta	0.714286	0	0
Pre	Yes	PNAPM	1998	Bonanza Profundo	2016	2	30	No	Acroporidae	Acropora cervicornis	0.333333	0	0
Pre	Yes	PNAPM	1998	Bonanza Profundo	2016	2	30	No	Acroporidae	Acropora palmata	0	0	0
Pre	Yes	PNAPM	1998	Bonanza Profundo	2016	2	30	No	Acroporidae	Acropora cervicornis	0	0	0
Pre	Yes	PNAPM	1998	Bonanza Profundo	2016	2	30	No	Agariciidae	Agaricia (encrusting)	14.6667	0	0
Pre	Yes	PNAPM	1998	Bonanza Profundo	2016	2	30	No	Agariciidae	Agaricia (encrusting)	0	0	0
Pre	Yes	PNAPM	1998	Bonanza Profundo	2016	2	30	No	Agariciidae	Agaricia (encrusting)	0	0	0
Pre	Yes	PNAPM	1998	Bonanza Profundo	2016	2	30	No	Agariciidae	Agaricia (encrusting)	0	0	0
Pre	Yes	PNAPM	1998	Bonanza Profundo	2016	2	30	No	Agariciidae	Agaricia (encrusting)	0.333333	0	0
Pre	Yes	PNAPM	1998	Bonanza Profundo	2016	2	30	No	Agariciidae	Agaricia (encrusting)	0.333333	0	0
Pre	Yes	PNAPM	1998	Bonanza Profundo	2016	2	30	No	Agariciidae	Agaricia tenuifolia	0	0	0
Pre	Yes	PNAPM	1998	Bonanza Profundo	2016	2	30	Yes	Faviinae	Colpophyllia natans	0	0	0
Pre	Yes	PNAPM	1998	Bonanza Profundo	2016	2	30	Yes	Meandrinidae	Dendrogyra cylindrus	0	0	0
Pre	Yes	PNAPM	1998	Bonanza Profundo	2016	2	30	Yes	Meandrinidae	Dichocoenia stokesi	2	0	0
Pre	Yes	PNAPM	1998	Bonanza Profundo	2016	2	30	Yes	Faviinae	Diploria labyrinthiformis	0	0	0
Pre	Yes	PNAPM	1998	Bonanza Profundo	2016	2	30	Yes	Meandrinidae	Eusmilia fastigiata	0	0	0
Pre	Yes	PNAPM	1998	Bonanza Profundo	2016	2	30	No	Faviinae	Favia fragum	0	0	0
Pre	Yes	PNAPM	1998	Bonanza Profundo	2016	2	30	No	Agariciidae	Helioseris cucullata	1.33333	0	0
Pre	Yes	PNAPM	1998	Bonanza Profundo	2016	2	30	Yes	Mussinae	Isophyllia spp.	0	0	0
Pre	Yes	PNAPM	1998	Bonanza Profundo	2016	2	30	Yes	Mussinae	Isophyllia spp.	0	0	0
Pre	Yes	PNAPM	1998	Bonanza Profundo	2016	2	30	Yes	Mussinae	Isophyllia spp.	0	0	0
Pre	Yes	PNAPM	1998	Bonanza Profundo	2016	2	30	No	Pocilloporidae	Madracis spp.	0	0	0
Pre	Yes	PNAPM	1998	Bonanza Profundo	2016	2	30	No	Pocilloporidae	Madracis spp.	0	0	0
Pre	Yes	PNAPM	1998	Bonanza Profundo	2016	2	30	Yes	Meandrinidae	Meandrina spp.	0	0	0
Pre	Yes	PNAPM	1998	Bonanza Profundo	2016	2	30	Yes	Meandrinidae	Meandrina spp.	0	0	0
Pre	Yes	PNAPM	1998	Bonanza Profundo	2016	2	30	Yes	Meandrinidae	Meandrina spp.	0	0	0
Pre	Yes	PNAPM	1998	Bonanza Profundo	2016	2	30	Yes	Montastraeidae	Montastraea cavernosa	2.33333	0	0
Pre	Yes	PNAPM	1998	Bonanza Profundo	2016	2	30	No	Mussinae	Mussa angulosa	0	0	0
Pre	Yes	PNAPM	1998	Bonanza Profundo	2016	2	30	Yes	Mussinae	Mycetophyllia spp.	0	0	0
Pre	Yes	PNAPM	1998	Bonanza Profundo	2016	2	30	Yes	Mussinae	Mycetophyllia spp.	0	0	0
Pre	Yes	PNAPM	1998	Bonanza Profundo	2016	2	30	Yes	Mussinae	Mycetophyllia spp.	0.333333	0	0
Pre	Yes	PNAPM	1998	Bonanza Profundo	2016	2	30	Yes	Mussinae	Mycetophyllia spp.	0	0	0
Pre	Yes	PNAPM	1998	Bonanza Profundo	2016	2	30	Yes	Mussinae	Mycetophyllia spp.	0	0	0
Pre	Yes	PNAPM	1998	Bonanza Profundo	2016	2	30	Yes	Merulinidae	Orbicella annularis	0	0	0
Pre	Yes	PNAPM	1998	Bonanza Profundo	2016	2	30	Yes	Merulinidae	Orbicella faveolata	1.33333	0	0
Pre	Yes	PNAPM	1998	Bonanza Profundo	2016	2	30	Yes	Merulinidae	Orbicella franksi	0.333333	0	0
Pre	Yes	PNAPM	1998	Bonanza Profundo	2016	2	30	No	Poritidae	Porites astreoides	2.66667	0	0
Pre	Yes	PNAPM	1998	Bonanza Profundo	2016	2	30	No	Poritidae	Branching Porites	0	0	0
Pre	Yes	PNAPM	1998	Bonanza Profundo	2016	2	30	No	Poritidae	Branching Porites	0	0	0
Pre	Yes	PNAPM	1998	Bonanza Profundo	2016	2	30	No	Poritidae	Branching Porites	0	0	0
Pre	Yes	PNAPM	1998	Bonanza Profundo	2016	2	30	No	Poritidae	Branching Porites	0	0	0
Pre	Yes	PNAPM	1998	Bonanza Profundo	2016	2	30	Yes	Faviinae	Pseudodiploria clivosa	0	0	0
Pre	Yes	PNAPM	1998	Bonanza Profundo	2016	2	30	Yes	Faviinae	Pseudodiploria strigosa	1	0	0
Pre	Yes	PNAPM	1998	Bonanza Profundo	2016	2	30	No	Mussinae	Scolymia spp.	0	0	0
Pre	Yes	PNAPM	1998	Bonanza Profundo	2016	2	30	No	Mussinae	Scolymia spp.	0	0	0
Pre	Yes	PNAPM	1998	Bonanza Profundo	2016	2	30	No	Siderastreidae	Siderastrea radians	0.666667	0	0
Pre	Yes	PNAPM	1998	Bonanza Profundo	2016	2	30	Yes	Siderastreidae	Siderastrea siderea	1.66667	0	0
Pre	Yes	PNAPM	1998	Bonanza Profundo	2016	2	30	No	Scleractinia incertae sedis	Solenastrea bournoni	0	0	0
Pre	Yes	PNAPM	1998	Bonanza Profundo	2016	2	30	No	Astrocoeniidae	Stephanocoenia intersepta	0	0	0
Pre	Yes	RBCM	2016	Casa Cenote	2016	2	20	No	Acroporidae	Acropora cervicornis	0	0	0
Pre	Yes	RBCM	2016	Casa Cenote	2016	2	20	No	Acroporidae	Acropora palmata	0.5	0	0
Pre	Yes	RBCM	2016	Casa Cenote	2016	2	20	No	Acroporidae	Acropora cervicornis	0	0	0
Pre	Yes	RBCM	2016	Casa Cenote	2016	2	20	No	Agariciidae	Agaricia (encrusting)	7	0	0
Pre	Yes	RBCM	2016	Casa Cenote	2016	2	20	No	Agariciidae	Agaricia (encrusting)	0	0	0
Pre	Yes	RBCM	2016	Casa Cenote	2016	2	20	No	Agariciidae	Agaricia (encrusting)	0	0	0
Pre	Yes	RBCM	2016	Casa Cenote	2016	2	20	No	Agariciidae	Agaricia (encrusting)	0	0	0
Pre	Yes	RBCM	2016	Casa Cenote	2016	2	20	No	Agariciidae	Agaricia (encrusting)	0	0	0
Pre	Yes	RBCM	2016	Casa Cenote	2016	2	20	No	Agariciidae	Agaricia (encrusting)	0	0	0
Pre	Yes	RBCM	2016	Casa Cenote	2016	2	20	No	Agariciidae	Agaricia tenuifolia	0.5	0	0
Pre	Yes	RBCM	2016	Casa Cenote	2016	2	20	Yes	Faviinae	Colpophyllia natans	0.5	0	0
Pre	Yes	RBCM	2016	Casa Cenote	2016	2	20	Yes	Meandrinidae	Dendrogyra cylindrus	0	0	0
Pre	Yes	RBCM	2016	Casa Cenote	2016	2	20	Yes	Meandrinidae	Dichocoenia stokesi	0.5	0	0
Pre	Yes	RBCM	2016	Casa Cenote	2016	2	20	Yes	Faviinae	Diploria labyrinthiformis	0	0	0
Pre	Yes	RBCM	2016	Casa Cenote	2016	2	20	Yes	Meandrinidae	Eusmilia fastigiata	0	0	0
Pre	Yes	RBCM	2016	Casa Cenote	2016	2	20	No	Faviinae	Favia fragum	0	0	0
Pre	Yes	RBCM	2016	Casa Cenote	2016	2	20	No	Agariciidae	Helioseris cucullata	0.5	0	0
Pre	Yes	RBCM	2016	Casa Cenote	2016	2	20	Yes	Mussinae	Isophyllia spp.	0	0	0
Pre	Yes	RBCM	2016	Casa Cenote	2016	2	20	Yes	Mussinae	Isophyllia spp.	0	0	0
Pre	Yes	RBCM	2016	Casa Cenote	2016	2	20	Yes	Mussinae	Isophyllia spp.	0	0	0
Pre	Yes	RBCM	2016	Casa Cenote	2016	2	20	No	Pocilloporidae	Madracis spp.	0	0	0
Pre	Yes	RBCM	2016	Casa Cenote	2016	2	20	No	Pocilloporidae	Madracis spp.	0	0	0
Pre	Yes	RBCM	2016	Casa Cenote	2016	2	20	Yes	Meandrinidae	Meandrina spp.	0	0	0
Pre	Yes	RBCM	2016	Casa Cenote	2016	2	20	Yes	Meandrinidae	Meandrina spp.	0.5	0	0
Pre	Yes	RBCM	2016	Casa Cenote	2016	2	20	Yes	Meandrinidae	Meandrina spp.	0	0	0
Pre	Yes	RBCM	2016	Casa Cenote	2016	2	20	Yes	Montastraeidae	Montastraea cavernosa	5.5	0	0
Pre	Yes	RBCM	2016	Casa Cenote	2016	2	20	No	Mussinae	Mussa angulosa	0	0	0
Pre	Yes	RBCM	2016	Casa Cenote	2016	2	20	Yes	Mussinae	Mycetophyllia spp.	0	0	0
Pre	Yes	RBCM	2016	Casa Cenote	2016	2	20	Yes	Mussinae	Mycetophyllia spp.	0	0	0
Pre	Yes	RBCM	2016	Casa Cenote	2016	2	20	Yes	Mussinae	Mycetophyllia spp.	0	0	0
Pre	Yes	RBCM	2016	Casa Cenote	2016	2	20	Yes	Mussinae	Mycetophyllia spp.	0	0	0
Pre	Yes	RBCM	2016	Casa Cenote	2016	2	20	Yes	Mussinae	Mycetophyllia spp.	0.5	0	0
Pre	Yes	RBCM	2016	Casa Cenote	2016	2	20	Yes	Merulinidae	Orbicella annularis	4.5	0	0
Pre	Yes	RBCM	2016	Casa Cenote	2016	2	20	Yes	Merulinidae	Orbicella faveolata	4	0	0
Pre	Yes	RBCM	2016	Casa Cenote	2016	2	20	Yes	Merulinidae	Orbicella franksi	0	0	0
Pre	Yes	RBCM	2016	Casa Cenote	2016	2	20	No	Poritidae	Porites astreoides	4	0	0
Pre	Yes	RBCM	2016	Casa Cenote	2016	2	20	No	Poritidae	Branching Porites	0.5	0	0
Pre	Yes	RBCM	2016	Casa Cenote	2016	2	20	No	Poritidae	Branching Porites	0	0	0
Pre	Yes	RBCM	2016	Casa Cenote	2016	2	20	No	Poritidae	Branching Porites	1.5	0	0
Pre	Yes	RBCM	2016	Casa Cenote	2016	2	20	No	Poritidae	Branching Porites	0	0	0
Pre	Yes	RBCM	2016	Casa Cenote	2016	2	20	Yes	Faviinae	Pseudodiploria clivosa	0	0	0
Pre	Yes	RBCM	2016	Casa Cenote	2016	2	20	Yes	Faviinae	Pseudodiploria strigosa	3.5	0	0
Pre	Yes	RBCM	2016	Casa Cenote	2016	2	20	No	Mussinae	Scolymia spp.	0	0	0
Pre	Yes	RBCM	2016	Casa Cenote	2016	2	20	No	Mussinae	Scolymia spp.	0	0	0
Pre	Yes	RBCM	2016	Casa Cenote	2016	2	20	No	Siderastreidae	Siderastrea radians	1	0	0
Pre	Yes	RBCM	2016	Casa Cenote	2016	2	20	Yes	Siderastreidae	Siderastrea siderea	9	0	0
Pre	Yes	RBCM	2016	Casa Cenote	2016	2	20	No	Scleractinia incertae sedis	Solenastrea bournoni	0	0	0
Pre	Yes	RBCM	2016	Casa Cenote	2016	2	20	No	Astrocoeniidae	Stephanocoenia intersepta	2	0	0
Pre	Yes	PNAC	1996	Chankanaab	2016/2017	7	35.65	No	Acroporidae	Acropora cervicornis	0	0	0
Pre	Yes	PNAC	1996	Chankanaab	2016/2017	7	35.65	No	Acroporidae	Acropora palmata	0	0	0
Pre	Yes	PNAC	1996	Chankanaab	2016/2017	7	35.65	No	Acroporidae	Acropora cervicornis	0	0	0
Pre	Yes	PNAC	1996	Chankanaab	2016/2017	7	35.65	No	Agariciidae	Agaricia (encrusting)	31.4165	0	0
Pre	Yes	PNAC	1996	Chankanaab	2016/2017	7	35.65	No	Agariciidae	Agaricia (encrusting)	0	0	0
Pre	Yes	PNAC	1996	Chankanaab	2016/2017	7	35.65	No	Agariciidae	Agaricia (encrusting)	0	0	0
Pre	Yes	PNAC	1996	Chankanaab	2016/2017	7	35.65	No	Agariciidae	Agaricia (encrusting)	0	0	0
Pre	Yes	PNAC	1996	Chankanaab	2016/2017	7	35.65	No	Agariciidae	Agaricia (encrusting)	1.12202	0	0
Pre	Yes	PNAC	1996	Chankanaab	2016/2017	7	35.65	No	Agariciidae	Agaricia (encrusting)	0	0	0
Pre	Yes	PNAC	1996	Chankanaab	2016/2017	7	35.65	No	Agariciidae	Agaricia tenuifolia	0.841515	0	0
Pre	Yes	PNAC	1996	Chankanaab	2016/2017	7	35.65	Yes	Faviinae	Colpophyllia natans	0.280505	0	0
Pre	Yes	PNAC	1996	Chankanaab	2016/2017	7	35.65	Yes	Meandrinidae	Dendrogyra cylindrus	0	0	0
Pre	Yes	PNAC	1996	Chankanaab	2016/2017	7	35.65	Yes	Meandrinidae	Dichocoenia stokesi	0	0	0
Pre	Yes	PNAC	1996	Chankanaab	2016/2017	7	35.65	Yes	Faviinae	Diploria labyrinthiformis	0.280505	0	0
Pre	Yes	PNAC	1996	Chankanaab	2016/2017	7	35.65	Yes	Meandrinidae	Eusmilia fastigiata	2.52454	0	0
Pre	Yes	PNAC	1996	Chankanaab	2016/2017	7	35.65	No	Faviinae	Favia fragum	0	0	0
Pre	Yes	PNAC	1996	Chankanaab	2016/2017	7	35.65	No	Agariciidae	Helioseris cucullata	0	0	0
Pre	Yes	PNAC	1996	Chankanaab	2016/2017	7	35.65	Yes	Mussinae	Isophyllia spp.	0	0	0
Pre	Yes	PNAC	1996	Chankanaab	2016/2017	7	35.65	Yes	Mussinae	Isophyllia spp.	0	0	0
Pre	Yes	PNAC	1996	Chankanaab	2016/2017	7	35.65	Yes	Mussinae	Isophyllia spp.	0	0	0
Pre	Yes	PNAC	1996	Chankanaab	2016/2017	7	35.65	No	Pocilloporidae	Madracis spp.	0.280505	0	0
Pre	Yes	PNAC	1996	Chankanaab	2016/2017	7	35.65	No	Pocilloporidae	Madracis spp.	0.841515	0	0
Pre	Yes	PNAC	1996	Chankanaab	2016/2017	7	35.65	Yes	Meandrinidae	Meandrina spp.	0	0	0
Pre	Yes	PNAC	1996	Chankanaab	2016/2017	7	35.65	Yes	Meandrinidae	Meandrina spp.	0.841515	0	0
Pre	Yes	PNAC	1996	Chankanaab	2016/2017	7	35.65	Yes	Meandrinidae	Meandrina spp.	0	0	0
Pre	Yes	PNAC	1996	Chankanaab	2016/2017	7	35.65	Yes	Montastraeidae	Montastraea cavernosa	1.68303	0	0
Pre	Yes	PNAC	1996	Chankanaab	2016/2017	7	35.65	No	Mussinae	Mussa angulosa	0	0	0
Pre	Yes	PNAC	1996	Chankanaab	2016/2017	7	35.65	Yes	Mussinae	Mycetophyllia spp.	0	0	0
Pre	Yes	PNAC	1996	Chankanaab	2016/2017	7	35.65	Yes	Mussinae	Mycetophyllia spp.	0	0	0
Pre	Yes	PNAC	1996	Chankanaab	2016/2017	7	35.65	Yes	Mussinae	Mycetophyllia spp.	0	0	0
Pre	Yes	PNAC	1996	Chankanaab	2016/2017	7	35.65	Yes	Mussinae	Mycetophyllia spp.	0	0	0
Pre	Yes	PNAC	1996	Chankanaab	2016/2017	7	35.65	Yes	Mussinae	Mycetophyllia spp.	0	0	0
Pre	Yes	PNAC	1996	Chankanaab	2016/2017	7	35.65	Yes	Merulinidae	Orbicella annularis	0.841515	0	0
Pre	Yes	PNAC	1996	Chankanaab	2016/2017	7	35.65	Yes	Merulinidae	Orbicella faveolata	4.48808	0	0
Pre	Yes	PNAC	1996	Chankanaab	2016/2017	7	35.65	Yes	Merulinidae	Orbicella franksi	3.92707	0	0
Pre	Yes	PNAC	1996	Chankanaab	2016/2017	7	35.65	No	Poritidae	Porites astreoides	11.2202	0	0
Pre	Yes	PNAC	1996	Chankanaab	2016/2017	7	35.65	No	Poritidae	Branching Porites	0	0	0
Pre	Yes	PNAC	1996	Chankanaab	2016/2017	7	35.65	No	Poritidae	Branching Porites	0	0	0
Pre	Yes	PNAC	1996	Chankanaab	2016/2017	7	35.65	No	Poritidae	Branching Porites	6.17111	0	0
Pre	Yes	PNAC	1996	Chankanaab	2016/2017	7	35.65	No	Poritidae	Branching Porites	0	0	0
Pre	Yes	PNAC	1996	Chankanaab	2016/2017	7	35.65	Yes	Faviinae	Pseudodiploria clivosa	0	0	0
Pre	Yes	PNAC	1996	Chankanaab	2016/2017	7	35.65	Yes	Faviinae	Pseudodiploria strigosa	0	0	0
Pre	Yes	PNAC	1996	Chankanaab	2016/2017	7	35.65	No	Mussinae	Scolymia spp.	0	0	0
Pre	Yes	PNAC	1996	Chankanaab	2016/2017	7	35.65	No	Mussinae	Scolymia spp.	0	0	0
Pre	Yes	PNAC	1996	Chankanaab	2016/2017	7	35.65	No	Siderastreidae	Siderastrea radians	0.56101	0	0
Pre	Yes	PNAC	1996	Chankanaab	2016/2017	7	35.65	Yes	Siderastreidae	Siderastrea siderea	5.32959	0	0
Pre	Yes	PNAC	1996	Chankanaab	2016/2017	7	35.65	No	Scleractinia incertae sedis	Solenastrea bournoni	0	0	0
Pre	Yes	PNAC	1996	Chankanaab	2016/2017	7	35.65	No	Astrocoeniidae	Stephanocoenia intersepta	0	0	0
Pre	Yes	PNAC	1996	Colombia	2016/2017	6	47	No	Acroporidae	Acropora cervicornis	0	0	0
Pre	Yes	PNAC	1996	Colombia	2016/2017	6	47	No	Acroporidae	Acropora palmata	0	0	0
Pre	Yes	PNAC	1996	Colombia	2016/2017	6	47	No	Acroporidae	Acropora cervicornis	0	0	0
Pre	Yes	PNAC	1996	Colombia	2016/2017	6	47	No	Agariciidae	Agaricia (encrusting)	19.3617	0	0
Pre	Yes	PNAC	1996	Colombia	2016/2017	6	47	No	Agariciidae	Agaricia (encrusting)	0	0	0
Pre	Yes	PNAC	1996	Colombia	2016/2017	6	47	No	Agariciidae	Agaricia (encrusting)	0	0	0
Pre	Yes	PNAC	1996	Colombia	2016/2017	6	47	No	Agariciidae	Agaricia (encrusting)	0.212766	0	0
Pre	Yes	PNAC	1996	Colombia	2016/2017	6	47	No	Agariciidae	Agaricia (encrusting)	0.212766	0	0
Pre	Yes	PNAC	1996	Colombia	2016/2017	6	47	No	Agariciidae	Agaricia (encrusting)	0	0	0
Pre	Yes	PNAC	1996	Colombia	2016/2017	6	47	No	Agariciidae	Agaricia tenuifolia	1.70213	0	0
Pre	Yes	PNAC	1996	Colombia	2016/2017	6	47	Yes	Faviinae	Colpophyllia natans	0.212766	0	0
Pre	Yes	PNAC	1996	Colombia	2016/2017	6	47	Yes	Meandrinidae	Dendrogyra cylindrus	0	0	0
Pre	Yes	PNAC	1996	Colombia	2016/2017	6	47	Yes	Meandrinidae	Dichocoenia stokesi	0.212766	0	0
Pre	Yes	PNAC	1996	Colombia	2016/2017	6	47	Yes	Faviinae	Diploria labyrinthiformis	0.212766	0	0
Pre	Yes	PNAC	1996	Colombia	2016/2017	6	47	Yes	Meandrinidae	Eusmilia fastigiata	0.851064	0	0
Pre	Yes	PNAC	1996	Colombia	2016/2017	6	47	No	Faviinae	Favia fragum	0	0	0
Pre	Yes	PNAC	1996	Colombia	2016/2017	6	47	No	Agariciidae	Helioseris cucullata	0.212766	0	0
Pre	Yes	PNAC	1996	Colombia	2016/2017	6	47	Yes	Mussinae	Isophyllia spp.	0	0	0
Pre	Yes	PNAC	1996	Colombia	2016/2017	6	47	Yes	Mussinae	Isophyllia spp.	0	0	0
Pre	Yes	PNAC	1996	Colombia	2016/2017	6	47	Yes	Mussinae	Isophyllia spp.	0	0	0
Pre	Yes	PNAC	1996	Colombia	2016/2017	6	47	No	Pocilloporidae	Madracis spp.	0	0	0
Pre	Yes	PNAC	1996	Colombia	2016/2017	6	47	No	Pocilloporidae	Madracis spp.	0.638298	0	0
Pre	Yes	PNAC	1996	Colombia	2016/2017	6	47	Yes	Meandrinidae	Meandrina spp.	0	0	0
Pre	Yes	PNAC	1996	Colombia	2016/2017	6	47	Yes	Meandrinidae	Meandrina spp.	0.212766	0	0
Pre	Yes	PNAC	1996	Colombia	2016/2017	6	47	Yes	Meandrinidae	Meandrina spp.	0.638298	0	0
Pre	Yes	PNAC	1996	Colombia	2016/2017	6	47	Yes	Montastraeidae	Montastraea cavernosa	1.06383	0	0
Pre	Yes	PNAC	1996	Colombia	2016/2017	6	47	No	Mussinae	Mussa angulosa	0	0	0
Pre	Yes	PNAC	1996	Colombia	2016/2017	6	47	Yes	Mussinae	Mycetophyllia spp.	0	0	0
Pre	Yes	PNAC	1996	Colombia	2016/2017	6	47	Yes	Mussinae	Mycetophyllia spp.	0	0	0
Pre	Yes	PNAC	1996	Colombia	2016/2017	6	47	Yes	Mussinae	Mycetophyllia spp.	0	0	0
Pre	Yes	PNAC	1996	Colombia	2016/2017	6	47	Yes	Mussinae	Mycetophyllia spp.	0	0	0
Pre	Yes	PNAC	1996	Colombia	2016/2017	6	47	Yes	Mussinae	Mycetophyllia spp.	0	0	0
Pre	Yes	PNAC	1996	Colombia	2016/2017	6	47	Yes	Merulinidae	Orbicella annularis	0.425532	0	0
Pre	Yes	PNAC	1996	Colombia	2016/2017	6	47	Yes	Merulinidae	Orbicella faveolata	0.638298	0	0
Pre	Yes	PNAC	1996	Colombia	2016/2017	6	47	Yes	Merulinidae	Orbicella franksi	1.70213	0	0
Pre	Yes	PNAC	1996	Colombia	2016/2017	6	47	No	Poritidae	Porites astreoides	3.82979	0	0
Pre	Yes	PNAC	1996	Colombia	2016/2017	6	47	No	Poritidae	Branching Porites	0	0	0
Pre	Yes	PNAC	1996	Colombia	2016/2017	6	47	No	Poritidae	Branching Porites	0	0	0
Pre	Yes	PNAC	1996	Colombia	2016/2017	6	47	No	Poritidae	Branching Porites	6.59574	0	0
Pre	Yes	PNAC	1996	Colombia	2016/2017	6	47	No	Poritidae	Branching Porites	0	0	0
Pre	Yes	PNAC	1996	Colombia	2016/2017	6	47	Yes	Faviinae	Pseudodiploria clivosa	0	0	0
Pre	Yes	PNAC	1996	Colombia	2016/2017	6	47	Yes	Faviinae	Pseudodiploria strigosa	0.638298	0	0
Pre	Yes	PNAC	1996	Colombia	2016/2017	6	47	No	Mussinae	Scolymia spp.	0	0	0
Pre	Yes	PNAC	1996	Colombia	2016/2017	6	47	No	Mussinae	Scolymia spp.	0	0	0
Pre	Yes	PNAC	1996	Colombia	2016/2017	6	47	No	Siderastreidae	Siderastrea radians	0	0	0
Pre	Yes	PNAC	1996	Colombia	2016/2017	6	47	Yes	Siderastreidae	Siderastrea siderea	2.12766	0	0
Pre	Yes	PNAC	1996	Colombia	2016/2017	6	47	No	Scleractinia incertae sedis	Solenastrea bournoni	0	0	0
Pre	Yes	PNAC	1996	Colombia	2016/2017	6	47	No	Astrocoeniidae	Stephanocoenia intersepta	0.425532	0	0
Pre	Yes	PNAC	1996	Dalila	2016/2017	4	22	No	Acroporidae	Acropora cervicornis	0	0	0
Pre	Yes	PNAC	1996	Dalila	2016/2017	4	22	No	Acroporidae	Acropora palmata	0	0	0
Pre	Yes	PNAC	1996	Dalila	2016/2017	4	22	No	Acroporidae	Acropora cervicornis	0	0	0
Pre	Yes	PNAC	1996	Dalila	2016/2017	4	22	No	Agariciidae	Agaricia (encrusting)	30.4545	0	0
Pre	Yes	PNAC	1996	Dalila	2016/2017	4	22	No	Agariciidae	Agaricia (encrusting)	0	0	0
Pre	Yes	PNAC	1996	Dalila	2016/2017	4	22	No	Agariciidae	Agaricia (encrusting)	0	0	0
Pre	Yes	PNAC	1996	Dalila	2016/2017	4	22	No	Agariciidae	Agaricia (encrusting)	1.36364	0	0
Pre	Yes	PNAC	1996	Dalila	2016/2017	4	22	No	Agariciidae	Agaricia (encrusting)	0.454545	0	0
Pre	Yes	PNAC	1996	Dalila	2016/2017	4	22	No	Agariciidae	Agaricia (encrusting)	0	0	0
Pre	Yes	PNAC	1996	Dalila	2016/2017	4	22	No	Agariciidae	Agaricia tenuifolia	4.09091	0	0
Pre	Yes	PNAC	1996	Dalila	2016/2017	4	22	Yes	Faviinae	Colpophyllia natans	0	0	0
Pre	Yes	PNAC	1996	Dalila	2016/2017	4	22	Yes	Meandrinidae	Dendrogyra cylindrus	0	0	0
Pre	Yes	PNAC	1996	Dalila	2016/2017	4	22	Yes	Meandrinidae	Dichocoenia stokesi	0.454545	0	0
Pre	Yes	PNAC	1996	Dalila	2016/2017	4	22	Yes	Faviinae	Diploria labyrinthiformis	0.454545	0	0
Pre	Yes	PNAC	1996	Dalila	2016/2017	4	22	Yes	Meandrinidae	Eusmilia fastigiata	1.36364	0	0
Pre	Yes	PNAC	1996	Dalila	2016/2017	4	22	No	Faviinae	Favia fragum	0	0	0
Pre	Yes	PNAC	1996	Dalila	2016/2017	4	22	No	Agariciidae	Helioseris cucullata	0	0	0
Pre	Yes	PNAC	1996	Dalila	2016/2017	4	22	Yes	Mussinae	Isophyllia spp.	0.454545	0	0
Pre	Yes	PNAC	1996	Dalila	2016/2017	4	22	Yes	Mussinae	Isophyllia spp.	0	0	0
Pre	Yes	PNAC	1996	Dalila	2016/2017	4	22	Yes	Mussinae	Isophyllia spp.	0	0	0
Pre	Yes	PNAC	1996	Dalila	2016/2017	4	22	No	Pocilloporidae	Madracis spp.	0	0	0
Pre	Yes	PNAC	1996	Dalila	2016/2017	4	22	No	Pocilloporidae	Madracis spp.	0.909091	0	0
Pre	Yes	PNAC	1996	Dalila	2016/2017	4	22	Yes	Meandrinidae	Meandrina spp.	0	0	0
Pre	Yes	PNAC	1996	Dalila	2016/2017	4	22	Yes	Meandrinidae	Meandrina spp.	0.454545	0	0
Pre	Yes	PNAC	1996	Dalila	2016/2017	4	22	Yes	Meandrinidae	Meandrina spp.	0	0	0
Pre	Yes	PNAC	1996	Dalila	2016/2017	4	22	Yes	Montastraeidae	Montastraea cavernosa	3.63636	0.454545	0
Pre	Yes	PNAC	1996	Dalila	2016/2017	4	22	No	Mussinae	Mussa angulosa	0	0	0
Pre	Yes	PNAC	1996	Dalila	2016/2017	4	22	Yes	Mussinae	Mycetophyllia spp.	0	0	0
Pre	Yes	PNAC	1996	Dalila	2016/2017	4	22	Yes	Mussinae	Mycetophyllia spp.	0	0	0
Pre	Yes	PNAC	1996	Dalila	2016/2017	4	22	Yes	Mussinae	Mycetophyllia spp.	0	0	0
Pre	Yes	PNAC	1996	Dalila	2016/2017	4	22	Yes	Mussinae	Mycetophyllia spp.	0	0	0
Pre	Yes	PNAC	1996	Dalila	2016/2017	4	22	Yes	Mussinae	Mycetophyllia spp.	0	0	0
Pre	Yes	PNAC	1996	Dalila	2016/2017	4	22	Yes	Merulinidae	Orbicella annularis	0	0	0
Pre	Yes	PNAC	1996	Dalila	2016/2017	4	22	Yes	Merulinidae	Orbicella faveolata	0.454545	0	0
Pre	Yes	PNAC	1996	Dalila	2016/2017	4	22	Yes	Merulinidae	Orbicella franksi	0	0	0
Pre	Yes	PNAC	1996	Dalila	2016/2017	4	22	No	Poritidae	Porites astreoides	13.6364	0	0
Pre	Yes	PNAC	1996	Dalila	2016/2017	4	22	No	Poritidae	Branching Porites	0	0	0
Pre	Yes	PNAC	1996	Dalila	2016/2017	4	22	No	Poritidae	Branching Porites	0	0	0
Pre	Yes	PNAC	1996	Dalila	2016/2017	4	22	No	Poritidae	Branching Porites	9.54545	0	0
Pre	Yes	PNAC	1996	Dalila	2016/2017	4	22	No	Poritidae	Branching Porites	0	0	0
Pre	Yes	PNAC	1996	Dalila	2016/2017	4	22	Yes	Faviinae	Pseudodiploria clivosa	0	0	0
Pre	Yes	PNAC	1996	Dalila	2016/2017	4	22	Yes	Faviinae	Pseudodiploria strigosa	0	0	0
Pre	Yes	PNAC	1996	Dalila	2016/2017	4	22	No	Mussinae	Scolymia spp.	0	0	0
Pre	Yes	PNAC	1996	Dalila	2016/2017	4	22	No	Mussinae	Scolymia spp.	0	0	0
Pre	Yes	PNAC	1996	Dalila	2016/2017	4	22	No	Siderastreidae	Siderastrea radians	0.909091	0	0
Pre	Yes	PNAC	1996	Dalila	2016/2017	4	22	Yes	Siderastreidae	Siderastrea siderea	2.27273	0	0
Pre	Yes	PNAC	1996	Dalila	2016/2017	4	22	No	Scleractinia incertae sedis	Solenastrea bournoni	0	0	0
Pre	Yes	PNAC	1996	Dalila	2016/2017	4	22	No	Astrocoeniidae	Stephanocoenia intersepta	1.81818	0	0
Pre	Yes	NA	NA	Fish Market	2016	1	10	No	Acroporidae	Acropora cervicornis	1	0	0
Pre	Yes	NA	NA	Fish Market	2016	1	10	No	Acroporidae	Acropora palmata	0	0	0
Pre	Yes	NA	NA	Fish Market	2016	1	10	No	Acroporidae	Acropora cervicornis	0	0	0
Pre	Yes	NA	NA	Fish Market	2016	1	10	No	Agariciidae	Agaricia (encrusting)	26	0	0
Pre	Yes	NA	NA	Fish Market	2016	1	10	No	Agariciidae	Agaricia (encrusting)	0	0	0
Pre	Yes	NA	NA	Fish Market	2016	1	10	No	Agariciidae	Agaricia (encrusting)	0	0	0
Pre	Yes	NA	NA	Fish Market	2016	1	10	No	Agariciidae	Agaricia (encrusting)	0	0	0
Pre	Yes	NA	NA	Fish Market	2016	1	10	No	Agariciidae	Agaricia (encrusting)	0	0	0
Pre	Yes	NA	NA	Fish Market	2016	1	10	No	Agariciidae	Agaricia (encrusting)	0	0	0
Pre	Yes	NA	NA	Fish Market	2016	1	10	No	Agariciidae	Agaricia tenuifolia	0	0	0
Pre	Yes	NA	NA	Fish Market	2016	1	10	Yes	Faviinae	Colpophyllia natans	0	0	0
Pre	Yes	NA	NA	Fish Market	2016	1	10	Yes	Meandrinidae	Dendrogyra cylindrus	0	0	0
Pre	Yes	NA	NA	Fish Market	2016	1	10	Yes	Meandrinidae	Dichocoenia stokesi	0	0	0
Pre	Yes	NA	NA	Fish Market	2016	1	10	Yes	Faviinae	Diploria labyrinthiformis	0	0	0
Pre	Yes	NA	NA	Fish Market	2016	1	10	Yes	Meandrinidae	Eusmilia fastigiata	0	0	0
Pre	Yes	NA	NA	Fish Market	2016	1	10	No	Faviinae	Favia fragum	0	0	0
Pre	Yes	NA	NA	Fish Market	2016	1	10	No	Agariciidae	Helioseris cucullata	0	0	0
Pre	Yes	NA	NA	Fish Market	2016	1	10	Yes	Mussinae	Isophyllia spp.	0	0	0
Pre	Yes	NA	NA	Fish Market	2016	1	10	Yes	Mussinae	Isophyllia spp.	0	0	0
Pre	Yes	NA	NA	Fish Market	2016	1	10	Yes	Mussinae	Isophyllia spp.	0	0	0
Pre	Yes	NA	NA	Fish Market	2016	1	10	No	Pocilloporidae	Madracis spp.	1	0	0
Pre	Yes	NA	NA	Fish Market	2016	1	10	No	Pocilloporidae	Madracis spp.	0	0	0
Pre	Yes	NA	NA	Fish Market	2016	1	10	Yes	Meandrinidae	Meandrina spp.	1	0	0
Pre	Yes	NA	NA	Fish Market	2016	1	10	Yes	Meandrinidae	Meandrina spp.	1	0	0
Pre	Yes	NA	NA	Fish Market	2016	1	10	Yes	Meandrinidae	Meandrina spp.	0	0	0
Pre	Yes	NA	NA	Fish Market	2016	1	10	Yes	Montastraeidae	Montastraea cavernosa	0	0	0
Pre	Yes	NA	NA	Fish Market	2016	1	10	No	Mussinae	Mussa angulosa	0	0	0
Pre	Yes	NA	NA	Fish Market	2016	1	10	Yes	Mussinae	Mycetophyllia spp.	0	0	0
Pre	Yes	NA	NA	Fish Market	2016	1	10	Yes	Mussinae	Mycetophyllia spp.	0	0	0
Pre	Yes	NA	NA	Fish Market	2016	1	10	Yes	Mussinae	Mycetophyllia spp.	0	0	0
Pre	Yes	NA	NA	Fish Market	2016	1	10	Yes	Mussinae	Mycetophyllia spp.	0	0	0
Pre	Yes	NA	NA	Fish Market	2016	1	10	Yes	Mussinae	Mycetophyllia spp.	0	0	0
Pre	Yes	NA	NA	Fish Market	2016	1	10	Yes	Merulinidae	Orbicella annularis	0	0	0
Pre	Yes	NA	NA	Fish Market	2016	1	10	Yes	Merulinidae	Orbicella faveolata	1	0	0
Pre	Yes	NA	NA	Fish Market	2016	1	10	Yes	Merulinidae	Orbicella franksi	0	0	0
Pre	Yes	NA	NA	Fish Market	2016	1	10	No	Poritidae	Porites astreoides	5	0	0
Pre	Yes	NA	NA	Fish Market	2016	1	10	No	Poritidae	Branching Porites	0	0	0
Pre	Yes	NA	NA	Fish Market	2016	1	10	No	Poritidae	Branching Porites	0	0	0
Pre	Yes	NA	NA	Fish Market	2016	1	10	No	Poritidae	Branching Porites	0	0	0
Pre	Yes	NA	NA	Fish Market	2016	1	10	No	Poritidae	Branching Porites	0	0	0
Pre	Yes	NA	NA	Fish Market	2016	1	10	Yes	Faviinae	Pseudodiploria clivosa	0	0	0
Pre	Yes	NA	NA	Fish Market	2016	1	10	Yes	Faviinae	Pseudodiploria strigosa	0	0	0
Pre	Yes	NA	NA	Fish Market	2016	1	10	No	Mussinae	Scolymia spp.	0	0	0
Pre	Yes	NA	NA	Fish Market	2016	1	10	No	Mussinae	Scolymia spp.	0	0	0
Pre	Yes	NA	NA	Fish Market	2016	1	10	No	Siderastreidae	Siderastrea radians	0	0	0
Pre	Yes	NA	NA	Fish Market	2016	1	10	Yes	Siderastreidae	Siderastrea siderea	4	0	0
Pre	Yes	NA	NA	Fish Market	2016	1	10	No	Scleractinia incertae sedis	Solenastrea bournoni	0	0	0
Pre	Yes	NA	NA	Fish Market	2016	1	10	No	Astrocoeniidae	Stephanocoenia intersepta	0	0	0
Pre	Yes	APFFIC	2012	Hanan	2016	2	25	No	Acroporidae	Acropora cervicornis	0	0	0
Pre	Yes	APFFIC	2012	Hanan	2016	2	25	No	Acroporidae	Acropora palmata	0	0	0
Pre	Yes	APFFIC	2012	Hanan	2016	2	25	No	Acroporidae	Acropora cervicornis	0	0	0
Pre	Yes	APFFIC	2012	Hanan	2016	2	25	No	Agariciidae	Agaricia (encrusting)	46	0	0
Pre	Yes	APFFIC	2012	Hanan	2016	2	25	No	Agariciidae	Agaricia (encrusting)	0	0	0
Pre	Yes	APFFIC	2012	Hanan	2016	2	25	No	Agariciidae	Agaricia (encrusting)	0	0	0
Pre	Yes	APFFIC	2012	Hanan	2016	2	25	No	Agariciidae	Agaricia (encrusting)	0	0	0
Pre	Yes	APFFIC	2012	Hanan	2016	2	25	No	Agariciidae	Agaricia (encrusting)	0	0	0
Pre	Yes	APFFIC	2012	Hanan	2016	2	25	No	Agariciidae	Agaricia (encrusting)	0	0	0
Pre	Yes	APFFIC	2012	Hanan	2016	2	25	No	Agariciidae	Agaricia tenuifolia	2.8	0	0
Pre	Yes	APFFIC	2012	Hanan	2016	2	25	Yes	Faviinae	Colpophyllia natans	0	0	0
Pre	Yes	APFFIC	2012	Hanan	2016	2	25	Yes	Meandrinidae	Dendrogyra cylindrus	0	0	0
Pre	Yes	APFFIC	2012	Hanan	2016	2	25	Yes	Meandrinidae	Dichocoenia stokesi	0	0	0
Pre	Yes	APFFIC	2012	Hanan	2016	2	25	Yes	Faviinae	Diploria labyrinthiformis	0	0	0
Pre	Yes	APFFIC	2012	Hanan	2016	2	25	Yes	Meandrinidae	Eusmilia fastigiata	0	0	0
Pre	Yes	APFFIC	2012	Hanan	2016	2	25	No	Faviinae	Favia fragum	0	0	0
Pre	Yes	APFFIC	2012	Hanan	2016	2	25	No	Agariciidae	Helioseris cucullata	0	0	0
Pre	Yes	APFFIC	2012	Hanan	2016	2	25	Yes	Mussinae	Isophyllia spp.	0	0	0
Pre	Yes	APFFIC	2012	Hanan	2016	2	25	Yes	Mussinae	Isophyllia spp.	0	0	0
Pre	Yes	APFFIC	2012	Hanan	2016	2	25	Yes	Mussinae	Isophyllia spp.	0	0	0
Pre	Yes	APFFIC	2012	Hanan	2016	2	25	No	Pocilloporidae	Madracis spp.	0	0	0
Pre	Yes	APFFIC	2012	Hanan	2016	2	25	No	Pocilloporidae	Madracis spp.	0	0	0
Pre	Yes	APFFIC	2012	Hanan	2016	2	25	Yes	Meandrinidae	Meandrina spp.	0	0	0
Pre	Yes	APFFIC	2012	Hanan	2016	2	25	Yes	Meandrinidae	Meandrina spp.	0.4	0	0
Pre	Yes	APFFIC	2012	Hanan	2016	2	25	Yes	Meandrinidae	Meandrina spp.	0	0	0
Pre	Yes	APFFIC	2012	Hanan	2016	2	25	Yes	Montastraeidae	Montastraea cavernosa	1.2	0	0
Pre	Yes	APFFIC	2012	Hanan	2016	2	25	No	Mussinae	Mussa angulosa	0	0	0
Pre	Yes	APFFIC	2012	Hanan	2016	2	25	Yes	Mussinae	Mycetophyllia spp.	0	0	0
Pre	Yes	APFFIC	2012	Hanan	2016	2	25	Yes	Mussinae	Mycetophyllia spp.	0	0	0
Pre	Yes	APFFIC	2012	Hanan	2016	2	25	Yes	Mussinae	Mycetophyllia spp.	0	0	0
Pre	Yes	APFFIC	2012	Hanan	2016	2	25	Yes	Mussinae	Mycetophyllia spp.	0	0	0
Pre	Yes	APFFIC	2012	Hanan	2016	2	25	Yes	Mussinae	Mycetophyllia spp.	0	0	0
Pre	Yes	APFFIC	2012	Hanan	2016	2	25	Yes	Merulinidae	Orbicella annularis	0	0	0
Pre	Yes	APFFIC	2012	Hanan	2016	2	25	Yes	Merulinidae	Orbicella faveolata	0.4	0	0
Pre	Yes	APFFIC	2012	Hanan	2016	2	25	Yes	Merulinidae	Orbicella franksi	0	0	0
Pre	Yes	APFFIC	2012	Hanan	2016	2	25	No	Poritidae	Porites astreoides	9.6	0	0
Pre	Yes	APFFIC	2012	Hanan	2016	2	25	No	Poritidae	Branching Porites	0.8	0	0
Pre	Yes	APFFIC	2012	Hanan	2016	2	25	No	Poritidae	Branching Porites	0	0	0
Pre	Yes	APFFIC	2012	Hanan	2016	2	25	No	Poritidae	Branching Porites	1.6	0	0
Pre	Yes	APFFIC	2012	Hanan	2016	2	25	No	Poritidae	Branching Porites	0	0	0
Pre	Yes	APFFIC	2012	Hanan	2016	2	25	Yes	Faviinae	Pseudodiploria clivosa	0	0	0
Pre	Yes	APFFIC	2012	Hanan	2016	2	25	Yes	Faviinae	Pseudodiploria strigosa	0	0	0
Pre	Yes	APFFIC	2012	Hanan	2016	2	25	No	Mussinae	Scolymia spp.	0	0	0
Pre	Yes	APFFIC	2012	Hanan	2016	2	25	No	Mussinae	Scolymia spp.	0	0	0
Pre	Yes	APFFIC	2012	Hanan	2016	2	25	No	Siderastreidae	Siderastrea radians	0	0	0
Pre	Yes	APFFIC	2012	Hanan	2016	2	25	Yes	Siderastreidae	Siderastrea siderea	2	0	0
Pre	Yes	APFFIC	2012	Hanan	2016	2	25	No	Scleractinia incertae sedis	Solenastrea bournoni	0	0	0
Pre	Yes	APFFIC	2012	Hanan	2016	2	25	No	Astrocoeniidae	Stephanocoenia intersepta	0	0	0
Pre	Yes	APFFIC	2012	Hanan II	2016	2	18	No	Acroporidae	Acropora cervicornis	0	0	0
Pre	Yes	APFFIC	2012	Hanan II	2016	2	18	No	Acroporidae	Acropora palmata	0	0	0
Pre	Yes	APFFIC	2012	Hanan II	2016	2	18	No	Acroporidae	Acropora cervicornis	0	0	0
Pre	Yes	APFFIC	2012	Hanan II	2016	2	18	No	Agariciidae	Agaricia (encrusting)	10.5556	0	0
Pre	Yes	APFFIC	2012	Hanan II	2016	2	18	No	Agariciidae	Agaricia (encrusting)	0	0	0
Pre	Yes	APFFIC	2012	Hanan II	2016	2	18	No	Agariciidae	Agaricia (encrusting)	0	0	0
Pre	Yes	APFFIC	2012	Hanan II	2016	2	18	No	Agariciidae	Agaricia (encrusting)	0	0	0
Pre	Yes	APFFIC	2012	Hanan II	2016	2	18	No	Agariciidae	Agaricia (encrusting)	0	0	0
Pre	Yes	APFFIC	2012	Hanan II	2016	2	18	No	Agariciidae	Agaricia (encrusting)	0	0	0
Pre	Yes	APFFIC	2012	Hanan II	2016	2	18	No	Agariciidae	Agaricia tenuifolia	0	0	0
Pre	Yes	APFFIC	2012	Hanan II	2016	2	18	Yes	Faviinae	Colpophyllia natans	0	0	0
Pre	Yes	APFFIC	2012	Hanan II	2016	2	18	Yes	Meandrinidae	Dendrogyra cylindrus	0	0	0
Pre	Yes	APFFIC	2012	Hanan II	2016	2	18	Yes	Meandrinidae	Dichocoenia stokesi	0	0	0
Pre	Yes	APFFIC	2012	Hanan II	2016	2	18	Yes	Faviinae	Diploria labyrinthiformis	0	0	0
Pre	Yes	APFFIC	2012	Hanan II	2016	2	18	Yes	Meandrinidae	Eusmilia fastigiata	0	0	0
Pre	Yes	APFFIC	2012	Hanan II	2016	2	18	No	Faviinae	Favia fragum	0	0	0
Pre	Yes	APFFIC	2012	Hanan II	2016	2	18	No	Agariciidae	Helioseris cucullata	0	0	0
Pre	Yes	APFFIC	2012	Hanan II	2016	2	18	Yes	Mussinae	Isophyllia spp.	0.555556	0	0
Pre	Yes	APFFIC	2012	Hanan II	2016	2	18	Yes	Mussinae	Isophyllia spp.	0	0	0
Pre	Yes	APFFIC	2012	Hanan II	2016	2	18	Yes	Mussinae	Isophyllia spp.	0	0	0
Pre	Yes	APFFIC	2012	Hanan II	2016	2	18	No	Pocilloporidae	Madracis spp.	0	0	0
Pre	Yes	APFFIC	2012	Hanan II	2016	2	18	No	Pocilloporidae	Madracis spp.	0	0	0
Pre	Yes	APFFIC	2012	Hanan II	2016	2	18	Yes	Meandrinidae	Meandrina spp.	0	0	0
Pre	Yes	APFFIC	2012	Hanan II	2016	2	18	Yes	Meandrinidae	Meandrina spp.	0	0	0
Pre	Yes	APFFIC	2012	Hanan II	2016	2	18	Yes	Meandrinidae	Meandrina spp.	0	0	0
Pre	Yes	APFFIC	2012	Hanan II	2016	2	18	Yes	Montastraeidae	Montastraea cavernosa	1.66667	0	0
Pre	Yes	APFFIC	2012	Hanan II	2016	2	18	No	Mussinae	Mussa angulosa	0	0	0
Pre	Yes	APFFIC	2012	Hanan II	2016	2	18	Yes	Mussinae	Mycetophyllia spp.	0	0	0
Pre	Yes	APFFIC	2012	Hanan II	2016	2	18	Yes	Mussinae	Mycetophyllia spp.	0	0	0
Pre	Yes	APFFIC	2012	Hanan II	2016	2	18	Yes	Mussinae	Mycetophyllia spp.	0	0	0
Pre	Yes	APFFIC	2012	Hanan II	2016	2	18	Yes	Mussinae	Mycetophyllia spp.	0	0	0
Pre	Yes	APFFIC	2012	Hanan II	2016	2	18	Yes	Mussinae	Mycetophyllia spp.	0	0	0
Pre	Yes	APFFIC	2012	Hanan II	2016	2	18	Yes	Merulinidae	Orbicella annularis	0	0	0
Pre	Yes	APFFIC	2012	Hanan II	2016	2	18	Yes	Merulinidae	Orbicella faveolata	0	0	0
Pre	Yes	APFFIC	2012	Hanan II	2016	2	18	Yes	Merulinidae	Orbicella franksi	0	0	0
Pre	Yes	APFFIC	2012	Hanan II	2016	2	18	No	Poritidae	Porites astreoides	18.8889	0	0
Pre	Yes	APFFIC	2012	Hanan II	2016	2	18	No	Poritidae	Branching Porites	1.11111	0	0
Pre	Yes	APFFIC	2012	Hanan II	2016	2	18	No	Poritidae	Branching Porites	0	0	0
Pre	Yes	APFFIC	2012	Hanan II	2016	2	18	No	Poritidae	Branching Porites	3.88889	0	0
Pre	Yes	APFFIC	2012	Hanan II	2016	2	18	No	Poritidae	Branching Porites	0	0	0
Pre	Yes	APFFIC	2012	Hanan II	2016	2	18	Yes	Faviinae	Pseudodiploria clivosa	0.555556	0	0
Pre	Yes	APFFIC	2012	Hanan II	2016	2	18	Yes	Faviinae	Pseudodiploria strigosa	8.33333	0	0
Pre	Yes	APFFIC	2012	Hanan II	2016	2	18	No	Mussinae	Scolymia spp.	0	0	0
Pre	Yes	APFFIC	2012	Hanan II	2016	2	18	No	Mussinae	Scolymia spp.	0	0	0
Pre	Yes	APFFIC	2012	Hanan II	2016	2	18	No	Siderastreidae	Siderastrea radians	0.555556	0	0
Pre	Yes	APFFIC	2012	Hanan II	2016	2	18	Yes	Siderastreidae	Siderastrea siderea	7.77778	0	0
Pre	Yes	APFFIC	2012	Hanan II	2016	2	18	No	Scleractinia incertae sedis	Solenastrea bournoni	0	0	0
Pre	Yes	APFFIC	2012	Hanan II	2016	2	18	No	Astrocoeniidae	Stephanocoenia intersepta	0	0	0
Pre	Yes	PNIC	1998	Ixlache	2016	2	20	No	Acroporidae	Acropora cervicornis	0	0	0
Pre	Yes	PNIC	1998	Ixlache	2016	2	20	No	Acroporidae	Acropora palmata	0	0	0
Pre	Yes	PNIC	1998	Ixlache	2016	2	20	No	Acroporidae	Acropora cervicornis	0	0	0
Pre	Yes	PNIC	1998	Ixlache	2016	2	20	No	Agariciidae	Agaricia (encrusting)	2.5	0	0
Pre	Yes	PNIC	1998	Ixlache	2016	2	20	No	Agariciidae	Agaricia (encrusting)	0	0	0
Pre	Yes	PNIC	1998	Ixlache	2016	2	20	No	Agariciidae	Agaricia (encrusting)	0	0	0
Pre	Yes	PNIC	1998	Ixlache	2016	2	20	No	Agariciidae	Agaricia (encrusting)	0	0	0
Pre	Yes	PNIC	1998	Ixlache	2016	2	20	No	Agariciidae	Agaricia (encrusting)	0	0	0
Pre	Yes	PNIC	1998	Ixlache	2016	2	20	No	Agariciidae	Agaricia (encrusting)	0	0	0
Pre	Yes	PNIC	1998	Ixlache	2016	2	20	No	Agariciidae	Agaricia tenuifolia	0	0	0
Pre	Yes	PNIC	1998	Ixlache	2016	2	20	Yes	Faviinae	Colpophyllia natans	1	0	0
Pre	Yes	PNIC	1998	Ixlache	2016	2	20	Yes	Meandrinidae	Dendrogyra cylindrus	0	0	0
Pre	Yes	PNIC	1998	Ixlache	2016	2	20	Yes	Meandrinidae	Dichocoenia stokesi	0	0	0
Pre	Yes	PNIC	1998	Ixlache	2016	2	20	Yes	Faviinae	Diploria labyrinthiformis	0	0	0
Pre	Yes	PNIC	1998	Ixlache	2016	2	20	Yes	Meandrinidae	Eusmilia fastigiata	0	0	0
Pre	Yes	PNIC	1998	Ixlache	2016	2	20	No	Faviinae	Favia fragum	0	0	0
Pre	Yes	PNIC	1998	Ixlache	2016	2	20	No	Agariciidae	Helioseris cucullata	0	0	0
Pre	Yes	PNIC	1998	Ixlache	2016	2	20	Yes	Mussinae	Isophyllia spp.	0	0	0
Pre	Yes	PNIC	1998	Ixlache	2016	2	20	Yes	Mussinae	Isophyllia spp.	0	0	0
Pre	Yes	PNIC	1998	Ixlache	2016	2	20	Yes	Mussinae	Isophyllia spp.	0	0	0
Pre	Yes	PNIC	1998	Ixlache	2016	2	20	No	Pocilloporidae	Madracis spp.	0	0	0
Pre	Yes	PNIC	1998	Ixlache	2016	2	20	No	Pocilloporidae	Madracis spp.	0	0	0
Pre	Yes	PNIC	1998	Ixlache	2016	2	20	Yes	Meandrinidae	Meandrina spp.	0	0	0
Pre	Yes	PNIC	1998	Ixlache	2016	2	20	Yes	Meandrinidae	Meandrina spp.	0	0	0
Pre	Yes	PNIC	1998	Ixlache	2016	2	20	Yes	Meandrinidae	Meandrina spp.	0	0	0
Pre	Yes	PNIC	1998	Ixlache	2016	2	20	Yes	Montastraeidae	Montastraea cavernosa	0	0	0
Pre	Yes	PNIC	1998	Ixlache	2016	2	20	No	Mussinae	Mussa angulosa	0	0	0
Pre	Yes	PNIC	1998	Ixlache	2016	2	20	Yes	Mussinae	Mycetophyllia spp.	0	0	0
Pre	Yes	PNIC	1998	Ixlache	2016	2	20	Yes	Mussinae	Mycetophyllia spp.	0	0	0
Pre	Yes	PNIC	1998	Ixlache	2016	2	20	Yes	Mussinae	Mycetophyllia spp.	0	0	0
Pre	Yes	PNIC	1998	Ixlache	2016	2	20	Yes	Mussinae	Mycetophyllia spp.	0	0	0
Pre	Yes	PNIC	1998	Ixlache	2016	2	20	Yes	Mussinae	Mycetophyllia spp.	0	0	0
Pre	Yes	PNIC	1998	Ixlache	2016	2	20	Yes	Merulinidae	Orbicella annularis	0	0	0
Pre	Yes	PNIC	1998	Ixlache	2016	2	20	Yes	Merulinidae	Orbicella faveolata	0	0	0
Pre	Yes	PNIC	1998	Ixlache	2016	2	20	Yes	Merulinidae	Orbicella franksi	0	0	0
Pre	Yes	PNIC	1998	Ixlache	2016	2	20	No	Poritidae	Porites astreoides	26	0	0
Pre	Yes	PNIC	1998	Ixlache	2016	2	20	No	Poritidae	Branching Porites	0	0	0
Pre	Yes	PNIC	1998	Ixlache	2016	2	20	No	Poritidae	Branching Porites	3.5	0	0
Pre	Yes	PNIC	1998	Ixlache	2016	2	20	No	Poritidae	Branching Porites	2	0	0
Pre	Yes	PNIC	1998	Ixlache	2016	2	20	No	Poritidae	Branching Porites	0	0	0
Pre	Yes	PNIC	1998	Ixlache	2016	2	20	Yes	Faviinae	Pseudodiploria clivosa	0	0	0
Pre	Yes	PNIC	1998	Ixlache	2016	2	20	Yes	Faviinae	Pseudodiploria strigosa	1.5	0	0
Pre	Yes	PNIC	1998	Ixlache	2016	2	20	No	Mussinae	Scolymia spp.	0	0	0
Pre	Yes	PNIC	1998	Ixlache	2016	2	20	No	Mussinae	Scolymia spp.	0	0	0
Pre	Yes	PNIC	1998	Ixlache	2016	2	20	No	Siderastreidae	Siderastrea radians	2	0	0
Pre	Yes	PNIC	1998	Ixlache	2016	2	20	Yes	Siderastreidae	Siderastrea siderea	1	0	0
Pre	Yes	PNIC	1998	Ixlache	2016	2	20	No	Scleractinia incertae sedis	Solenastrea bournoni	0	0	0
Pre	Yes	PNIC	1998	Ixlache	2016	2	20	No	Astrocoeniidae	Stephanocoenia intersepta	0	0	0
Pre	Yes	PNAPM	1998	Jardines	2016	4	47	No	Acroporidae	Acropora cervicornis	0	0	0
Pre	Yes	PNAPM	1998	Jardines	2016	4	47	No	Acroporidae	Acropora palmata	0.212766	0	0
Pre	Yes	PNAPM	1998	Jardines	2016	4	47	No	Acroporidae	Acropora cervicornis	0	0	0
Pre	Yes	PNAPM	1998	Jardines	2016	4	47	No	Agariciidae	Agaricia (encrusting)	3.40426	0	0
Pre	Yes	PNAPM	1998	Jardines	2016	4	47	No	Agariciidae	Agaricia (encrusting)	0	0	0
Pre	Yes	PNAPM	1998	Jardines	2016	4	47	No	Agariciidae	Agaricia (encrusting)	0	0	0
Pre	Yes	PNAPM	1998	Jardines	2016	4	47	No	Agariciidae	Agaricia (encrusting)	0	0	0
Pre	Yes	PNAPM	1998	Jardines	2016	4	47	No	Agariciidae	Agaricia (encrusting)	0	0	0
Pre	Yes	PNAPM	1998	Jardines	2016	4	47	No	Agariciidae	Agaricia (encrusting)	0	0	0
Pre	Yes	PNAPM	1998	Jardines	2016	4	47	No	Agariciidae	Agaricia tenuifolia	2.34043	0	0
Pre	Yes	PNAPM	1998	Jardines	2016	4	47	Yes	Faviinae	Colpophyllia natans	0	0	0
Pre	Yes	PNAPM	1998	Jardines	2016	4	47	Yes	Meandrinidae	Dendrogyra cylindrus	0	0	0
Pre	Yes	PNAPM	1998	Jardines	2016	4	47	Yes	Meandrinidae	Dichocoenia stokesi	0.212766	0	0
Pre	Yes	PNAPM	1998	Jardines	2016	4	47	Yes	Faviinae	Diploria labyrinthiformis	0	0	0
Pre	Yes	PNAPM	1998	Jardines	2016	4	47	Yes	Meandrinidae	Eusmilia fastigiata	0	0	0
Pre	Yes	PNAPM	1998	Jardines	2016	4	47	No	Faviinae	Favia fragum	0	0	0
Pre	Yes	PNAPM	1998	Jardines	2016	4	47	No	Agariciidae	Helioseris cucullata	0	0	0
Pre	Yes	PNAPM	1998	Jardines	2016	4	47	Yes	Mussinae	Isophyllia spp.	0	0	0
Pre	Yes	PNAPM	1998	Jardines	2016	4	47	Yes	Mussinae	Isophyllia spp.	0	0	0
Pre	Yes	PNAPM	1998	Jardines	2016	4	47	Yes	Mussinae	Isophyllia spp.	0	0	0
Pre	Yes	PNAPM	1998	Jardines	2016	4	47	No	Pocilloporidae	Madracis spp.	0	0	0
Pre	Yes	PNAPM	1998	Jardines	2016	4	47	No	Pocilloporidae	Madracis spp.	0	0	0
Pre	Yes	PNAPM	1998	Jardines	2016	4	47	Yes	Meandrinidae	Meandrina spp.	0	0	0
Pre	Yes	PNAPM	1998	Jardines	2016	4	47	Yes	Meandrinidae	Meandrina spp.	0	0	0
Pre	Yes	PNAPM	1998	Jardines	2016	4	47	Yes	Meandrinidae	Meandrina spp.	0	0	0
Pre	Yes	PNAPM	1998	Jardines	2016	4	47	Yes	Montastraeidae	Montastraea cavernosa	0	0	0
Pre	Yes	PNAPM	1998	Jardines	2016	4	47	No	Mussinae	Mussa angulosa	0	0	0
Pre	Yes	PNAPM	1998	Jardines	2016	4	47	Yes	Mussinae	Mycetophyllia spp.	0	0	0
Pre	Yes	PNAPM	1998	Jardines	2016	4	47	Yes	Mussinae	Mycetophyllia spp.	0	0	0
Pre	Yes	PNAPM	1998	Jardines	2016	4	47	Yes	Mussinae	Mycetophyllia spp.	0	0	0
Pre	Yes	PNAPM	1998	Jardines	2016	4	47	Yes	Mussinae	Mycetophyllia spp.	0	0	0
Pre	Yes	PNAPM	1998	Jardines	2016	4	47	Yes	Mussinae	Mycetophyllia spp.	0	0	0
Pre	Yes	PNAPM	1998	Jardines	2016	4	47	Yes	Merulinidae	Orbicella annularis	1.70213	0	0
Pre	Yes	PNAPM	1998	Jardines	2016	4	47	Yes	Merulinidae	Orbicella faveolata	0	0	0
Pre	Yes	PNAPM	1998	Jardines	2016	4	47	Yes	Merulinidae	Orbicella franksi	0	0	0
Pre	Yes	PNAPM	1998	Jardines	2016	4	47	No	Poritidae	Porites astreoides	6.38298	0	0
Pre	Yes	PNAPM	1998	Jardines	2016	4	47	No	Poritidae	Branching Porites	0	0	0
Pre	Yes	PNAPM	1998	Jardines	2016	4	47	No	Poritidae	Branching Porites	0	0	0
Pre	Yes	PNAPM	1998	Jardines	2016	4	47	No	Poritidae	Branching Porites	1.70213	0	0
Pre	Yes	PNAPM	1998	Jardines	2016	4	47	No	Poritidae	Branching Porites	0	0	0
Pre	Yes	PNAPM	1998	Jardines	2016	4	47	Yes	Faviinae	Pseudodiploria clivosa	0	0	0
Pre	Yes	PNAPM	1998	Jardines	2016	4	47	Yes	Faviinae	Pseudodiploria strigosa	0.638298	0	0
Pre	Yes	PNAPM	1998	Jardines	2016	4	47	No	Mussinae	Scolymia spp.	0	0	0
Pre	Yes	PNAPM	1998	Jardines	2016	4	47	No	Mussinae	Scolymia spp.	0	0	0
Pre	Yes	PNAPM	1998	Jardines	2016	4	47	No	Siderastreidae	Siderastrea radians	0	0	0
Pre	Yes	PNAPM	1998	Jardines	2016	4	47	Yes	Siderastreidae	Siderastrea siderea	2.34043	0	0
Pre	Yes	PNAPM	1998	Jardines	2016	4	47	No	Scleractinia incertae sedis	Solenastrea bournoni	0	0	0
Pre	Yes	PNAPM	1998	Jardines	2016	4	47	No	Astrocoeniidae	Stephanocoenia intersepta	0	0	0
Pre	Yes	PNAPM	1998	LA BOCANA	2016	4	40	No	Acroporidae	Acropora cervicornis	0	0	0
Pre	Yes	PNAPM	1998	LA BOCANA	2016	4	40	No	Acroporidae	Acropora palmata	0	0	0
Pre	Yes	PNAPM	1998	LA BOCANA	2016	4	40	No	Acroporidae	Acropora cervicornis	0	0	0
Pre	Yes	PNAPM	1998	LA BOCANA	2016	4	40	No	Agariciidae	Agaricia (encrusting)	6	0	0
Pre	Yes	PNAPM	1998	LA BOCANA	2016	4	40	No	Agariciidae	Agaricia (encrusting)	0	0	0
Pre	Yes	PNAPM	1998	LA BOCANA	2016	4	40	No	Agariciidae	Agaricia (encrusting)	0	0	0
Pre	Yes	PNAPM	1998	LA BOCANA	2016	4	40	No	Agariciidae	Agaricia (encrusting)	0	0	0
Pre	Yes	PNAPM	1998	LA BOCANA	2016	4	40	No	Agariciidae	Agaricia (encrusting)	0	0	0
Pre	Yes	PNAPM	1998	LA BOCANA	2016	4	40	No	Agariciidae	Agaricia (encrusting)	1	0	0
Pre	Yes	PNAPM	1998	LA BOCANA	2016	4	40	No	Agariciidae	Agaricia tenuifolia	0.25	0	0
Pre	Yes	PNAPM	1998	LA BOCANA	2016	4	40	Yes	Faviinae	Colpophyllia natans	0	0	0
Pre	Yes	PNAPM	1998	LA BOCANA	2016	4	40	Yes	Meandrinidae	Dendrogyra cylindrus	0	0	0
Pre	Yes	PNAPM	1998	LA BOCANA	2016	4	40	Yes	Meandrinidae	Dichocoenia stokesi	0	0	0
Pre	Yes	PNAPM	1998	LA BOCANA	2016	4	40	Yes	Faviinae	Diploria labyrinthiformis	0	0	0
Pre	Yes	PNAPM	1998	LA BOCANA	2016	4	40	Yes	Meandrinidae	Eusmilia fastigiata	0	0	0
Pre	Yes	PNAPM	1998	LA BOCANA	2016	4	40	No	Faviinae	Favia fragum	0	0	0
Pre	Yes	PNAPM	1998	LA BOCANA	2016	4	40	No	Agariciidae	Helioseris cucullata	0	0	0
Pre	Yes	PNAPM	1998	LA BOCANA	2016	4	40	Yes	Mussinae	Isophyllia spp.	0	0	0
Pre	Yes	PNAPM	1998	LA BOCANA	2016	4	40	Yes	Mussinae	Isophyllia spp.	0	0	0
Pre	Yes	PNAPM	1998	LA BOCANA	2016	4	40	Yes	Mussinae	Isophyllia spp.	0	0	0
Pre	Yes	PNAPM	1998	LA BOCANA	2016	4	40	No	Pocilloporidae	Madracis spp.	0	0	0
Pre	Yes	PNAPM	1998	LA BOCANA	2016	4	40	No	Pocilloporidae	Madracis spp.	0	0	0
Pre	Yes	PNAPM	1998	LA BOCANA	2016	4	40	Yes	Meandrinidae	Meandrina spp.	0	0	0
Pre	Yes	PNAPM	1998	LA BOCANA	2016	4	40	Yes	Meandrinidae	Meandrina spp.	0	0	0
Pre	Yes	PNAPM	1998	LA BOCANA	2016	4	40	Yes	Meandrinidae	Meandrina spp.	0	0	0
Pre	Yes	PNAPM	1998	LA BOCANA	2016	4	40	Yes	Montastraeidae	Montastraea cavernosa	1.5	0	0
Pre	Yes	PNAPM	1998	LA BOCANA	2016	4	40	No	Mussinae	Mussa angulosa	0	0	0
Pre	Yes	PNAPM	1998	LA BOCANA	2016	4	40	Yes	Mussinae	Mycetophyllia spp.	0	0	0
Pre	Yes	PNAPM	1998	LA BOCANA	2016	4	40	Yes	Mussinae	Mycetophyllia spp.	0	0	0
Pre	Yes	PNAPM	1998	LA BOCANA	2016	4	40	Yes	Mussinae	Mycetophyllia spp.	0	0	0
Pre	Yes	PNAPM	1998	LA BOCANA	2016	4	40	Yes	Mussinae	Mycetophyllia spp.	0	0	0
Pre	Yes	PNAPM	1998	LA BOCANA	2016	4	40	Yes	Mussinae	Mycetophyllia spp.	0	0	0
Pre	Yes	PNAPM	1998	LA BOCANA	2016	4	40	Yes	Merulinidae	Orbicella annularis	2.25	0	0
Pre	Yes	PNAPM	1998	LA BOCANA	2016	4	40	Yes	Merulinidae	Orbicella faveolata	1.75	0	0
Pre	Yes	PNAPM	1998	LA BOCANA	2016	4	40	Yes	Merulinidae	Orbicella franksi	0	0	0
Pre	Yes	PNAPM	1998	LA BOCANA	2016	4	40	No	Poritidae	Porites astreoides	0.5	0	0
Pre	Yes	PNAPM	1998	LA BOCANA	2016	4	40	No	Poritidae	Branching Porites	0	0	0
Pre	Yes	PNAPM	1998	LA BOCANA	2016	4	40	No	Poritidae	Branching Porites	0	0	0
Pre	Yes	PNAPM	1998	LA BOCANA	2016	4	40	No	Poritidae	Branching Porites	0.25	0	0
Pre	Yes	PNAPM	1998	LA BOCANA	2016	4	40	No	Poritidae	Branching Porites	0	0	0
Pre	Yes	PNAPM	1998	LA BOCANA	2016	4	40	Yes	Faviinae	Pseudodiploria clivosa	0	0	0
Pre	Yes	PNAPM	1998	LA BOCANA	2016	4	40	Yes	Faviinae	Pseudodiploria strigosa	1	0	0
Pre	Yes	PNAPM	1998	LA BOCANA	2016	4	40	No	Mussinae	Scolymia spp.	0	0	0
Pre	Yes	PNAPM	1998	LA BOCANA	2016	4	40	No	Mussinae	Scolymia spp.	0	0	0
Pre	Yes	PNAPM	1998	LA BOCANA	2016	4	40	No	Siderastreidae	Siderastrea radians	0	0	0
Pre	Yes	PNAPM	1998	LA BOCANA	2016	4	40	Yes	Siderastreidae	Siderastrea siderea	3.25	0	0
Pre	Yes	PNAPM	1998	LA BOCANA	2016	4	40	No	Scleractinia incertae sedis	Solenastrea bournoni	0	0	0
Pre	Yes	PNAPM	1998	LA BOCANA	2016	4	40	No	Astrocoeniidae	Stephanocoenia intersepta	0.5	0	0
Pre	Yes	PNAPM	1998	La Pared	2016	4	40	No	Acroporidae	Acropora cervicornis	0	0	0
Pre	Yes	PNAPM	1998	La Pared	2016	4	40	No	Acroporidae	Acropora palmata	0.25	0	0
Pre	Yes	PNAPM	1998	La Pared	2016	4	40	No	Acroporidae	Acropora cervicornis	0	0	0
Pre	Yes	PNAPM	1998	La Pared	2016	4	40	No	Agariciidae	Agaricia (encrusting)	2	0	0
Pre	Yes	PNAPM	1998	La Pared	2016	4	40	No	Agariciidae	Agaricia (encrusting)	0	0	0
Pre	Yes	PNAPM	1998	La Pared	2016	4	40	No	Agariciidae	Agaricia (encrusting)	0	0	0
Pre	Yes	PNAPM	1998	La Pared	2016	4	40	No	Agariciidae	Agaricia (encrusting)	0	0	0
Pre	Yes	PNAPM	1998	La Pared	2016	4	40	No	Agariciidae	Agaricia (encrusting)	0	0	0
Pre	Yes	PNAPM	1998	La Pared	2016	4	40	No	Agariciidae	Agaricia (encrusting)	0	0	0
Pre	Yes	PNAPM	1998	La Pared	2016	4	40	No	Agariciidae	Agaricia tenuifolia	0.5	0	0
Pre	Yes	PNAPM	1998	La Pared	2016	4	40	Yes	Faviinae	Colpophyllia natans	0	0	0
Pre	Yes	PNAPM	1998	La Pared	2016	4	40	Yes	Meandrinidae	Dendrogyra cylindrus	0	0	0
Pre	Yes	PNAPM	1998	La Pared	2016	4	40	Yes	Meandrinidae	Dichocoenia stokesi	0	0	0
Pre	Yes	PNAPM	1998	La Pared	2016	4	40	Yes	Faviinae	Diploria labyrinthiformis	0.25	0	0
Pre	Yes	PNAPM	1998	La Pared	2016	4	40	Yes	Meandrinidae	Eusmilia fastigiata	0	0	0
Pre	Yes	PNAPM	1998	La Pared	2016	4	40	No	Faviinae	Favia fragum	0	0	0
Pre	Yes	PNAPM	1998	La Pared	2016	4	40	No	Agariciidae	Helioseris cucullata	0	0	0
Pre	Yes	PNAPM	1998	La Pared	2016	4	40	Yes	Mussinae	Isophyllia spp.	0	0	0
Pre	Yes	PNAPM	1998	La Pared	2016	4	40	Yes	Mussinae	Isophyllia spp.	0	0	0
Pre	Yes	PNAPM	1998	La Pared	2016	4	40	Yes	Mussinae	Isophyllia spp.	0	0	0
Pre	Yes	PNAPM	1998	La Pared	2016	4	40	No	Pocilloporidae	Madracis spp.	0	0	0
Pre	Yes	PNAPM	1998	La Pared	2016	4	40	No	Pocilloporidae	Madracis spp.	0	0	0
Pre	Yes	PNAPM	1998	La Pared	2016	4	40	Yes	Meandrinidae	Meandrina spp.	0	0	0
Pre	Yes	PNAPM	1998	La Pared	2016	4	40	Yes	Meandrinidae	Meandrina spp.	0	0	0
Pre	Yes	PNAPM	1998	La Pared	2016	4	40	Yes	Meandrinidae	Meandrina spp.	0	0	0
Pre	Yes	PNAPM	1998	La Pared	2016	4	40	Yes	Montastraeidae	Montastraea cavernosa	0.5	0	0
Pre	Yes	PNAPM	1998	La Pared	2016	4	40	No	Mussinae	Mussa angulosa	0	0	0
Pre	Yes	PNAPM	1998	La Pared	2016	4	40	Yes	Mussinae	Mycetophyllia spp.	0	0	0
Pre	Yes	PNAPM	1998	La Pared	2016	4	40	Yes	Mussinae	Mycetophyllia spp.	0	0	0
Pre	Yes	PNAPM	1998	La Pared	2016	4	40	Yes	Mussinae	Mycetophyllia spp.	0	0	0
Pre	Yes	PNAPM	1998	La Pared	2016	4	40	Yes	Mussinae	Mycetophyllia spp.	0	0	0
Pre	Yes	PNAPM	1998	La Pared	2016	4	40	Yes	Mussinae	Mycetophyllia spp.	0	0	0
Pre	Yes	PNAPM	1998	La Pared	2016	4	40	Yes	Merulinidae	Orbicella annularis	0.5	0	0
Pre	Yes	PNAPM	1998	La Pared	2016	4	40	Yes	Merulinidae	Orbicella faveolata	1	0	0
Pre	Yes	PNAPM	1998	La Pared	2016	4	40	Yes	Merulinidae	Orbicella franksi	0	0	0
Pre	Yes	PNAPM	1998	La Pared	2016	4	40	No	Poritidae	Porites astreoides	16.75	0	0
Pre	Yes	PNAPM	1998	La Pared	2016	4	40	No	Poritidae	Branching Porites	0	0	0
Pre	Yes	PNAPM	1998	La Pared	2016	4	40	No	Poritidae	Branching Porites	0	0	0
Pre	Yes	PNAPM	1998	La Pared	2016	4	40	No	Poritidae	Branching Porites	0.25	0	0
Pre	Yes	PNAPM	1998	La Pared	2016	4	40	No	Poritidae	Branching Porites	0	0	0
Pre	Yes	PNAPM	1998	La Pared	2016	4	40	Yes	Faviinae	Pseudodiploria clivosa	0	0	0
Pre	Yes	PNAPM	1998	La Pared	2016	4	40	Yes	Faviinae	Pseudodiploria strigosa	2.75	0	0
Pre	Yes	PNAPM	1998	La Pared	2016	4	40	No	Mussinae	Scolymia spp.	0	0	0
Pre	Yes	PNAPM	1998	La Pared	2016	4	40	No	Mussinae	Scolymia spp.	0	0	0
Pre	Yes	PNAPM	1998	La Pared	2016	4	40	No	Siderastreidae	Siderastrea radians	0.25	0	0
Pre	Yes	PNAPM	1998	La Pared	2016	4	40	Yes	Siderastreidae	Siderastrea siderea	1.25	0	0
Pre	Yes	PNAPM	1998	La Pared	2016	4	40	No	Scleractinia incertae sedis	Solenastrea bournoni	0	0	0
Pre	Yes	PNAPM	1998	La Pared	2016	4	40	No	Astrocoeniidae	Stephanocoenia intersepta	0	0	0
Pre	Yes	PNAX	2000	La Poza	2016	2	30	No	Acroporidae	Acropora cervicornis	0	0	0
Pre	Yes	PNAX	2000	La Poza	2016	2	30	No	Acroporidae	Acropora palmata	0	0	0
Pre	Yes	PNAX	2000	La Poza	2016	2	30	No	Acroporidae	Acropora cervicornis	0	0	0
Pre	Yes	PNAX	2000	La Poza	2016	2	30	No	Agariciidae	Agaricia (encrusting)	7.33333	0	0
Pre	Yes	PNAX	2000	La Poza	2016	2	30	No	Agariciidae	Agaricia (encrusting)	6.33333	0	0
Pre	Yes	PNAX	2000	La Poza	2016	2	30	No	Agariciidae	Agaricia (encrusting)	0	0	0
Pre	Yes	PNAX	2000	La Poza	2016	2	30	No	Agariciidae	Agaricia (encrusting)	0	0	0
Pre	Yes	PNAX	2000	La Poza	2016	2	30	No	Agariciidae	Agaricia (encrusting)	0	0	0
Pre	Yes	PNAX	2000	La Poza	2016	2	30	No	Agariciidae	Agaricia (encrusting)	0	0	0
Pre	Yes	PNAX	2000	La Poza	2016	2	30	No	Agariciidae	Agaricia tenuifolia	0.333333	0	0
Pre	Yes	PNAX	2000	La Poza	2016	2	30	Yes	Faviinae	Colpophyllia natans	0	0	0
Pre	Yes	PNAX	2000	La Poza	2016	2	30	Yes	Meandrinidae	Dendrogyra cylindrus	0	0	0
Pre	Yes	PNAX	2000	La Poza	2016	2	30	Yes	Meandrinidae	Dichocoenia stokesi	0	0	0
Pre	Yes	PNAX	2000	La Poza	2016	2	30	Yes	Faviinae	Diploria labyrinthiformis	0	0	0
Pre	Yes	PNAX	2000	La Poza	2016	2	30	Yes	Meandrinidae	Eusmilia fastigiata	0.666667	0	0
Pre	Yes	PNAX	2000	La Poza	2016	2	30	No	Faviinae	Favia fragum	0	0	0
Pre	Yes	PNAX	2000	La Poza	2016	2	30	No	Agariciidae	Helioseris cucullata	0	0	0
Pre	Yes	PNAX	2000	La Poza	2016	2	30	Yes	Mussinae	Isophyllia spp.	0	0	0
Pre	Yes	PNAX	2000	La Poza	2016	2	30	Yes	Mussinae	Isophyllia spp.	0	0	0
Pre	Yes	PNAX	2000	La Poza	2016	2	30	Yes	Mussinae	Isophyllia spp.	0	0	0
Pre	Yes	PNAX	2000	La Poza	2016	2	30	No	Pocilloporidae	Madracis spp.	0.666667	0	0
Pre	Yes	PNAX	2000	La Poza	2016	2	30	No	Pocilloporidae	Madracis spp.	0	0	0
Pre	Yes	PNAX	2000	La Poza	2016	2	30	Yes	Meandrinidae	Meandrina spp.	0	0	0
Pre	Yes	PNAX	2000	La Poza	2016	2	30	Yes	Meandrinidae	Meandrina spp.	0	0	0
Pre	Yes	PNAX	2000	La Poza	2016	2	30	Yes	Meandrinidae	Meandrina spp.	0	0	0
Pre	Yes	PNAX	2000	La Poza	2016	2	30	Yes	Montastraeidae	Montastraea cavernosa	3.66667	0	0
Pre	Yes	PNAX	2000	La Poza	2016	2	30	No	Mussinae	Mussa angulosa	0	0	0
Pre	Yes	PNAX	2000	La Poza	2016	2	30	Yes	Mussinae	Mycetophyllia spp.	0	0	0
Pre	Yes	PNAX	2000	La Poza	2016	2	30	Yes	Mussinae	Mycetophyllia spp.	0	0	0
Pre	Yes	PNAX	2000	La Poza	2016	2	30	Yes	Mussinae	Mycetophyllia spp.	0.333333	0	0
Pre	Yes	PNAX	2000	La Poza	2016	2	30	Yes	Mussinae	Mycetophyllia spp.	0	0	0
Pre	Yes	PNAX	2000	La Poza	2016	2	30	Yes	Mussinae	Mycetophyllia spp.	0	0	0
Pre	Yes	PNAX	2000	La Poza	2016	2	30	Yes	Merulinidae	Orbicella annularis	0	0	0
Pre	Yes	PNAX	2000	La Poza	2016	2	30	Yes	Merulinidae	Orbicella faveolata	2.33333	0	0
Pre	Yes	PNAX	2000	La Poza	2016	2	30	Yes	Merulinidae	Orbicella franksi	0	0	0
Pre	Yes	PNAX	2000	La Poza	2016	2	30	No	Poritidae	Porites astreoides	2	0	0
Pre	Yes	PNAX	2000	La Poza	2016	2	30	No	Poritidae	Branching Porites	0	0	0
Pre	Yes	PNAX	2000	La Poza	2016	2	30	No	Poritidae	Branching Porites	0.666667	0	0
Pre	Yes	PNAX	2000	La Poza	2016	2	30	No	Poritidae	Branching Porites	0.333333	0	0
Pre	Yes	PNAX	2000	La Poza	2016	2	30	No	Poritidae	Branching Porites	0	0	0
Pre	Yes	PNAX	2000	La Poza	2016	2	30	Yes	Faviinae	Pseudodiploria clivosa	0	0	0
Pre	Yes	PNAX	2000	La Poza	2016	2	30	Yes	Faviinae	Pseudodiploria strigosa	0.333333	0	0
Pre	Yes	PNAX	2000	La Poza	2016	2	30	No	Mussinae	Scolymia spp.	0	0	0
Pre	Yes	PNAX	2000	La Poza	2016	2	30	No	Mussinae	Scolymia spp.	0	0	0
Pre	Yes	PNAX	2000	La Poza	2016	2	30	No	Siderastreidae	Siderastrea radians	0.333333	0	0
Pre	Yes	PNAX	2000	La Poza	2016	2	30	Yes	Siderastreidae	Siderastrea siderea	6.33333	0	0
Pre	Yes	PNAX	2000	La Poza	2016	2	30	No	Scleractinia incertae sedis	Solenastrea bournoni	0	0	0
Pre	Yes	PNAX	2000	La Poza	2016	2	30	No	Astrocoeniidae	Stephanocoenia intersepta	1.66667	0	0
Pre	Yes	PNAPM	1998	Limones	2016	4	50	No	Acroporidae	Acropora cervicornis	0	0	0
Pre	Yes	PNAPM	1998	Limones	2016	4	50	No	Acroporidae	Acropora palmata	8.4	0	0
Pre	Yes	PNAPM	1998	Limones	2016	4	50	No	Acroporidae	Acropora cervicornis	0	0	0
Pre	Yes	PNAPM	1998	Limones	2016	4	50	No	Agariciidae	Agaricia (encrusting)	0.4	0	0
Pre	Yes	PNAPM	1998	Limones	2016	4	50	No	Agariciidae	Agaricia (encrusting)	0	0	0
Pre	Yes	PNAPM	1998	Limones	2016	4	50	No	Agariciidae	Agaricia (encrusting)	0	0	0
Pre	Yes	PNAPM	1998	Limones	2016	4	50	No	Agariciidae	Agaricia (encrusting)	0	0	0
Pre	Yes	PNAPM	1998	Limones	2016	4	50	No	Agariciidae	Agaricia (encrusting)	0	0	0
Pre	Yes	PNAPM	1998	Limones	2016	4	50	No	Agariciidae	Agaricia (encrusting)	0	0	0
Pre	Yes	PNAPM	1998	Limones	2016	4	50	No	Agariciidae	Agaricia tenuifolia	0	0	0
Pre	Yes	PNAPM	1998	Limones	2016	4	50	Yes	Faviinae	Colpophyllia natans	0	0	0
Pre	Yes	PNAPM	1998	Limones	2016	4	50	Yes	Meandrinidae	Dendrogyra cylindrus	0	0	0
Pre	Yes	PNAPM	1998	Limones	2016	4	50	Yes	Meandrinidae	Dichocoenia stokesi	0	0	0
Pre	Yes	PNAPM	1998	Limones	2016	4	50	Yes	Faviinae	Diploria labyrinthiformis	0	0	0
Pre	Yes	PNAPM	1998	Limones	2016	4	50	Yes	Meandrinidae	Eusmilia fastigiata	0	0	0
Pre	Yes	PNAPM	1998	Limones	2016	4	50	No	Faviinae	Favia fragum	0	0	0
Pre	Yes	PNAPM	1998	Limones	2016	4	50	No	Agariciidae	Helioseris cucullata	0	0	0
Pre	Yes	PNAPM	1998	Limones	2016	4	50	Yes	Mussinae	Isophyllia spp.	0	0	0
Pre	Yes	PNAPM	1998	Limones	2016	4	50	Yes	Mussinae	Isophyllia spp.	0	0	0
Pre	Yes	PNAPM	1998	Limones	2016	4	50	Yes	Mussinae	Isophyllia spp.	0	0	0
Pre	Yes	PNAPM	1998	Limones	2016	4	50	No	Pocilloporidae	Madracis spp.	0	0	0
Pre	Yes	PNAPM	1998	Limones	2016	4	50	No	Pocilloporidae	Madracis spp.	0	0	0
Pre	Yes	PNAPM	1998	Limones	2016	4	50	Yes	Meandrinidae	Meandrina spp.	0	0	0
Pre	Yes	PNAPM	1998	Limones	2016	4	50	Yes	Meandrinidae	Meandrina spp.	0	0	0
Pre	Yes	PNAPM	1998	Limones	2016	4	50	Yes	Meandrinidae	Meandrina spp.	0	0	0
Pre	Yes	PNAPM	1998	Limones	2016	4	50	Yes	Montastraeidae	Montastraea cavernosa	0	0	0
Pre	Yes	PNAPM	1998	Limones	2016	4	50	No	Mussinae	Mussa angulosa	0	0	0
Pre	Yes	PNAPM	1998	Limones	2016	4	50	Yes	Mussinae	Mycetophyllia spp.	0	0	0
Pre	Yes	PNAPM	1998	Limones	2016	4	50	Yes	Mussinae	Mycetophyllia spp.	0	0	0
Pre	Yes	PNAPM	1998	Limones	2016	4	50	Yes	Mussinae	Mycetophyllia spp.	0	0	0
Pre	Yes	PNAPM	1998	Limones	2016	4	50	Yes	Mussinae	Mycetophyllia spp.	0	0	0
Pre	Yes	PNAPM	1998	Limones	2016	4	50	Yes	Mussinae	Mycetophyllia spp.	0	0	0
Pre	Yes	PNAPM	1998	Limones	2016	4	50	Yes	Merulinidae	Orbicella annularis	0.6	0	0
Pre	Yes	PNAPM	1998	Limones	2016	4	50	Yes	Merulinidae	Orbicella faveolata	0	0	0
Pre	Yes	PNAPM	1998	Limones	2016	4	50	Yes	Merulinidae	Orbicella franksi	0	0	0
Pre	Yes	PNAPM	1998	Limones	2016	4	50	No	Poritidae	Porites astreoides	3.8	0	0
Pre	Yes	PNAPM	1998	Limones	2016	4	50	No	Poritidae	Branching Porites	0	0	0
Pre	Yes	PNAPM	1998	Limones	2016	4	50	No	Poritidae	Branching Porites	0.2	0	0
Pre	Yes	PNAPM	1998	Limones	2016	4	50	No	Poritidae	Branching Porites	0.6	0	0
Pre	Yes	PNAPM	1998	Limones	2016	4	50	No	Poritidae	Branching Porites	0	0	0
Pre	Yes	PNAPM	1998	Limones	2016	4	50	Yes	Faviinae	Pseudodiploria clivosa	0	0	0
Pre	Yes	PNAPM	1998	Limones	2016	4	50	Yes	Faviinae	Pseudodiploria strigosa	0.8	0	0
Pre	Yes	PNAPM	1998	Limones	2016	4	50	No	Mussinae	Scolymia spp.	0	0	0
Pre	Yes	PNAPM	1998	Limones	2016	4	50	No	Mussinae	Scolymia spp.	0	0	0
Pre	Yes	PNAPM	1998	Limones	2016	4	50	No	Siderastreidae	Siderastrea radians	0	0	0
Pre	Yes	PNAPM	1998	Limones	2016	4	50	Yes	Siderastreidae	Siderastrea siderea	0.8	0	0
Pre	Yes	PNAPM	1998	Limones	2016	4	50	No	Scleractinia incertae sedis	Solenastrea bournoni	0	0	0
Pre	Yes	PNAPM	1998	Limones	2016	4	50	No	Astrocoeniidae	Stephanocoenia intersepta	0	0	0
Pre	Yes	RBCM	2016	Mahahual	2016	2	29	No	Acroporidae	Acropora cervicornis	1.37931	0	0
Pre	Yes	RBCM	2016	Mahahual	2016	2	29	No	Acroporidae	Acropora palmata	0	0	0
Pre	Yes	RBCM	2016	Mahahual	2016	2	29	No	Acroporidae	Acropora cervicornis	0	0	0
Pre	Yes	RBCM	2016	Mahahual	2016	2	29	No	Agariciidae	Agaricia (encrusting)	15.5172	0	0
Pre	Yes	RBCM	2016	Mahahual	2016	2	29	No	Agariciidae	Agaricia (encrusting)	1.37931	0	0
Pre	Yes	RBCM	2016	Mahahual	2016	2	29	No	Agariciidae	Agaricia (encrusting)	0	0	0
Pre	Yes	RBCM	2016	Mahahual	2016	2	29	No	Agariciidae	Agaricia (encrusting)	0	0	0
Pre	Yes	RBCM	2016	Mahahual	2016	2	29	No	Agariciidae	Agaricia (encrusting)	0	0	0
Pre	Yes	RBCM	2016	Mahahual	2016	2	29	No	Agariciidae	Agaricia (encrusting)	0	0	0
Pre	Yes	RBCM	2016	Mahahual	2016	2	29	No	Agariciidae	Agaricia tenuifolia	0	0	0
Pre	Yes	RBCM	2016	Mahahual	2016	2	29	Yes	Faviinae	Colpophyllia natans	1.03448	0	0
Pre	Yes	RBCM	2016	Mahahual	2016	2	29	Yes	Meandrinidae	Dendrogyra cylindrus	0	0	0
Pre	Yes	RBCM	2016	Mahahual	2016	2	29	Yes	Meandrinidae	Dichocoenia stokesi	0.689655	0	0
Pre	Yes	RBCM	2016	Mahahual	2016	2	29	Yes	Faviinae	Diploria labyrinthiformis	0	0	0
Pre	Yes	RBCM	2016	Mahahual	2016	2	29	Yes	Meandrinidae	Eusmilia fastigiata	0	0	0
Pre	Yes	RBCM	2016	Mahahual	2016	2	29	No	Faviinae	Favia fragum	0	0	0
Pre	Yes	RBCM	2016	Mahahual	2016	2	29	No	Agariciidae	Helioseris cucullata	0.344828	0	0
Pre	Yes	RBCM	2016	Mahahual	2016	2	29	Yes	Mussinae	Isophyllia spp.	0	0	0
Pre	Yes	RBCM	2016	Mahahual	2016	2	29	Yes	Mussinae	Isophyllia spp.	0	0	0
Pre	Yes	RBCM	2016	Mahahual	2016	2	29	Yes	Mussinae	Isophyllia spp.	0	0	0
Pre	Yes	RBCM	2016	Mahahual	2016	2	29	No	Pocilloporidae	Madracis spp.	0	0	0
Pre	Yes	RBCM	2016	Mahahual	2016	2	29	No	Pocilloporidae	Madracis spp.	0	0	0
Pre	Yes	RBCM	2016	Mahahual	2016	2	29	Yes	Meandrinidae	Meandrina spp.	0	0	0
Pre	Yes	RBCM	2016	Mahahual	2016	2	29	Yes	Meandrinidae	Meandrina spp.	0	0	0
Pre	Yes	RBCM	2016	Mahahual	2016	2	29	Yes	Meandrinidae	Meandrina spp.	0	0	0
Pre	Yes	RBCM	2016	Mahahual	2016	2	29	Yes	Montastraeidae	Montastraea cavernosa	1.03448	0	0
Pre	Yes	RBCM	2016	Mahahual	2016	2	29	No	Mussinae	Mussa angulosa	0	0	0
Pre	Yes	RBCM	2016	Mahahual	2016	2	29	Yes	Mussinae	Mycetophyllia spp.	0	0	0
Pre	Yes	RBCM	2016	Mahahual	2016	2	29	Yes	Mussinae	Mycetophyllia spp.	0	0	0
Pre	Yes	RBCM	2016	Mahahual	2016	2	29	Yes	Mussinae	Mycetophyllia spp.	0.344828	0	0
Pre	Yes	RBCM	2016	Mahahual	2016	2	29	Yes	Mussinae	Mycetophyllia spp.	0	0	0
Pre	Yes	RBCM	2016	Mahahual	2016	2	29	Yes	Mussinae	Mycetophyllia spp.	0	0	0
Pre	Yes	RBCM	2016	Mahahual	2016	2	29	Yes	Merulinidae	Orbicella annularis	0	0	0
Pre	Yes	RBCM	2016	Mahahual	2016	2	29	Yes	Merulinidae	Orbicella faveolata	6.55172	0	0
Pre	Yes	RBCM	2016	Mahahual	2016	2	29	Yes	Merulinidae	Orbicella franksi	2.06897	0	0
Pre	Yes	RBCM	2016	Mahahual	2016	2	29	No	Poritidae	Porites astreoides	5.17241	0	0
Pre	Yes	RBCM	2016	Mahahual	2016	2	29	No	Poritidae	Branching Porites	0.344828	0	0
Pre	Yes	RBCM	2016	Mahahual	2016	2	29	No	Poritidae	Branching Porites	0	0	0
Pre	Yes	RBCM	2016	Mahahual	2016	2	29	No	Poritidae	Branching Porites	0.344828	0	0
Pre	Yes	RBCM	2016	Mahahual	2016	2	29	No	Poritidae	Branching Porites	0	0	0
Pre	Yes	RBCM	2016	Mahahual	2016	2	29	Yes	Faviinae	Pseudodiploria clivosa	0	0	0
Pre	Yes	RBCM	2016	Mahahual	2016	2	29	Yes	Faviinae	Pseudodiploria strigosa	0.689655	0	0
Pre	Yes	RBCM	2016	Mahahual	2016	2	29	No	Mussinae	Scolymia spp.	0	0	0
Pre	Yes	RBCM	2016	Mahahual	2016	2	29	No	Mussinae	Scolymia spp.	0	0	0
Pre	Yes	RBCM	2016	Mahahual	2016	2	29	No	Siderastreidae	Siderastrea radians	0	0	0
Pre	Yes	RBCM	2016	Mahahual	2016	2	29	Yes	Siderastreidae	Siderastrea siderea	1.03448	0	0
Pre	Yes	RBCM	2016	Mahahual	2016	2	29	No	Scleractinia incertae sedis	Solenastrea bournoni	0	0	0
Pre	Yes	RBCM	2016	Mahahual	2016	2	29	No	Astrocoeniidae	Stephanocoenia intersepta	0.344828	0	0
Pre	Yes	RBCM	2016	Mahahual Centro	2016	2	30	No	Acroporidae	Acropora cervicornis	0	0	0
Pre	Yes	RBCM	2016	Mahahual Centro	2016	2	30	No	Acroporidae	Acropora palmata	0	0	0
Pre	Yes	RBCM	2016	Mahahual Centro	2016	2	30	No	Acroporidae	Acropora cervicornis	0	0	0
Pre	Yes	RBCM	2016	Mahahual Centro	2016	2	30	No	Agariciidae	Agaricia (encrusting)	13.3333	0	0
Pre	Yes	RBCM	2016	Mahahual Centro	2016	2	30	No	Agariciidae	Agaricia (encrusting)	0	0	0
Pre	Yes	RBCM	2016	Mahahual Centro	2016	2	30	No	Agariciidae	Agaricia (encrusting)	0	0	0
Pre	Yes	RBCM	2016	Mahahual Centro	2016	2	30	No	Agariciidae	Agaricia (encrusting)	0	0	0
Pre	Yes	RBCM	2016	Mahahual Centro	2016	2	30	No	Agariciidae	Agaricia (encrusting)	0	0	0
Pre	Yes	RBCM	2016	Mahahual Centro	2016	2	30	No	Agariciidae	Agaricia (encrusting)	0	0	0
Pre	Yes	RBCM	2016	Mahahual Centro	2016	2	30	No	Agariciidae	Agaricia tenuifolia	2.33333	0	0
Pre	Yes	RBCM	2016	Mahahual Centro	2016	2	30	Yes	Faviinae	Colpophyllia natans	0	0	0
Pre	Yes	RBCM	2016	Mahahual Centro	2016	2	30	Yes	Meandrinidae	Dendrogyra cylindrus	0	0	0
Pre	Yes	RBCM	2016	Mahahual Centro	2016	2	30	Yes	Meandrinidae	Dichocoenia stokesi	0.666667	0	0
Pre	Yes	RBCM	2016	Mahahual Centro	2016	2	30	Yes	Faviinae	Diploria labyrinthiformis	0	0	0
Pre	Yes	RBCM	2016	Mahahual Centro	2016	2	30	Yes	Meandrinidae	Eusmilia fastigiata	0	0	0
Pre	Yes	RBCM	2016	Mahahual Centro	2016	2	30	No	Faviinae	Favia fragum	0	0	0
Pre	Yes	RBCM	2016	Mahahual Centro	2016	2	30	No	Agariciidae	Helioseris cucullata	0	0	0
Pre	Yes	RBCM	2016	Mahahual Centro	2016	2	30	Yes	Mussinae	Isophyllia spp.	0	0	0
Pre	Yes	RBCM	2016	Mahahual Centro	2016	2	30	Yes	Mussinae	Isophyllia spp.	0	0	0
Pre	Yes	RBCM	2016	Mahahual Centro	2016	2	30	Yes	Mussinae	Isophyllia spp.	0	0	0
Pre	Yes	RBCM	2016	Mahahual Centro	2016	2	30	No	Pocilloporidae	Madracis spp.	0	0	0
Pre	Yes	RBCM	2016	Mahahual Centro	2016	2	30	No	Pocilloporidae	Madracis spp.	0	0	0
Pre	Yes	RBCM	2016	Mahahual Centro	2016	2	30	Yes	Meandrinidae	Meandrina spp.	0	0	0
Pre	Yes	RBCM	2016	Mahahual Centro	2016	2	30	Yes	Meandrinidae	Meandrina spp.	0	0	0
Pre	Yes	RBCM	2016	Mahahual Centro	2016	2	30	Yes	Meandrinidae	Meandrina spp.	0	0	0
Pre	Yes	RBCM	2016	Mahahual Centro	2016	2	30	Yes	Montastraeidae	Montastraea cavernosa	0.666667	0	0
Pre	Yes	RBCM	2016	Mahahual Centro	2016	2	30	No	Mussinae	Mussa angulosa	0	0	0
Pre	Yes	RBCM	2016	Mahahual Centro	2016	2	30	Yes	Mussinae	Mycetophyllia spp.	0	0	0
Pre	Yes	RBCM	2016	Mahahual Centro	2016	2	30	Yes	Mussinae	Mycetophyllia spp.	0	0	0
Pre	Yes	RBCM	2016	Mahahual Centro	2016	2	30	Yes	Mussinae	Mycetophyllia spp.	0	0	0
Pre	Yes	RBCM	2016	Mahahual Centro	2016	2	30	Yes	Mussinae	Mycetophyllia spp.	0	0	0
Pre	Yes	RBCM	2016	Mahahual Centro	2016	2	30	Yes	Mussinae	Mycetophyllia spp.	0	0	0
Pre	Yes	RBCM	2016	Mahahual Centro	2016	2	30	Yes	Merulinidae	Orbicella annularis	1	0	0
Pre	Yes	RBCM	2016	Mahahual Centro	2016	2	30	Yes	Merulinidae	Orbicella faveolata	0.333333	0	0
Pre	Yes	RBCM	2016	Mahahual Centro	2016	2	30	Yes	Merulinidae	Orbicella franksi	0	0	0
Pre	Yes	RBCM	2016	Mahahual Centro	2016	2	30	No	Poritidae	Porites astreoides	2	0	0
Pre	Yes	RBCM	2016	Mahahual Centro	2016	2	30	No	Poritidae	Branching Porites	0.333333	0	0
Pre	Yes	RBCM	2016	Mahahual Centro	2016	2	30	No	Poritidae	Branching Porites	0.666667	0	0
Pre	Yes	RBCM	2016	Mahahual Centro	2016	2	30	No	Poritidae	Branching Porites	0.333333	0	0
Pre	Yes	RBCM	2016	Mahahual Centro	2016	2	30	No	Poritidae	Branching Porites	0	0	0
Pre	Yes	RBCM	2016	Mahahual Centro	2016	2	30	Yes	Faviinae	Pseudodiploria clivosa	0.333333	0	0
Pre	Yes	RBCM	2016	Mahahual Centro	2016	2	30	Yes	Faviinae	Pseudodiploria strigosa	3.33333	0	0
Pre	Yes	RBCM	2016	Mahahual Centro	2016	2	30	No	Mussinae	Scolymia spp.	0	0	0
Pre	Yes	RBCM	2016	Mahahual Centro	2016	2	30	No	Mussinae	Scolymia spp.	0	0	0
Pre	Yes	RBCM	2016	Mahahual Centro	2016	2	30	No	Siderastreidae	Siderastrea radians	0.666667	0	0
Pre	Yes	RBCM	2016	Mahahual Centro	2016	2	30	Yes	Siderastreidae	Siderastrea siderea	9.33333	0	0
Pre	Yes	RBCM	2016	Mahahual Centro	2016	2	30	No	Scleractinia incertae sedis	Solenastrea bournoni	0	0	0
Pre	Yes	RBCM	2016	Mahahual Centro	2016	2	30	No	Astrocoeniidae	Stephanocoenia intersepta	0.666667	0	0
Pre	Yes	PNAPM	1998	Manchones Norte	2016	2	18	No	Acroporidae	Acropora cervicornis	0.555556	0	0
Pre	Yes	PNAPM	1998	Manchones Norte	2016	2	18	No	Acroporidae	Acropora palmata	0	0	0
Pre	Yes	PNAPM	1998	Manchones Norte	2016	2	18	No	Acroporidae	Acropora cervicornis	0	0	0
Pre	Yes	PNAPM	1998	Manchones Norte	2016	2	18	No	Agariciidae	Agaricia (encrusting)	5	0	0
Pre	Yes	PNAPM	1998	Manchones Norte	2016	2	18	No	Agariciidae	Agaricia (encrusting)	0	0	0
Pre	Yes	PNAPM	1998	Manchones Norte	2016	2	18	No	Agariciidae	Agaricia (encrusting)	0	0	0
Pre	Yes	PNAPM	1998	Manchones Norte	2016	2	18	No	Agariciidae	Agaricia (encrusting)	0	0	0
Pre	Yes	PNAPM	1998	Manchones Norte	2016	2	18	No	Agariciidae	Agaricia (encrusting)	0	0	0
Pre	Yes	PNAPM	1998	Manchones Norte	2016	2	18	No	Agariciidae	Agaricia (encrusting)	0.555556	0	0
Pre	Yes	PNAPM	1998	Manchones Norte	2016	2	18	No	Agariciidae	Agaricia tenuifolia	0	0	0
Pre	Yes	PNAPM	1998	Manchones Norte	2016	2	18	Yes	Faviinae	Colpophyllia natans	1.66667	0	0
Pre	Yes	PNAPM	1998	Manchones Norte	2016	2	18	Yes	Meandrinidae	Dendrogyra cylindrus	0	0	0
Pre	Yes	PNAPM	1998	Manchones Norte	2016	2	18	Yes	Meandrinidae	Dichocoenia stokesi	0.555556	0	0
Pre	Yes	PNAPM	1998	Manchones Norte	2016	2	18	Yes	Faviinae	Diploria labyrinthiformis	0	0	0
Pre	Yes	PNAPM	1998	Manchones Norte	2016	2	18	Yes	Meandrinidae	Eusmilia fastigiata	0	0	0
Pre	Yes	PNAPM	1998	Manchones Norte	2016	2	18	No	Faviinae	Favia fragum	0	0	0
Pre	Yes	PNAPM	1998	Manchones Norte	2016	2	18	No	Agariciidae	Helioseris cucullata	0	0	0
Pre	Yes	PNAPM	1998	Manchones Norte	2016	2	18	Yes	Mussinae	Isophyllia spp.	0	0	0
Pre	Yes	PNAPM	1998	Manchones Norte	2016	2	18	Yes	Mussinae	Isophyllia spp.	0	0	0
Pre	Yes	PNAPM	1998	Manchones Norte	2016	2	18	Yes	Mussinae	Isophyllia spp.	0	0	0
Pre	Yes	PNAPM	1998	Manchones Norte	2016	2	18	No	Pocilloporidae	Madracis spp.	0	0	0
Pre	Yes	PNAPM	1998	Manchones Norte	2016	2	18	No	Pocilloporidae	Madracis spp.	0	0	0
Pre	Yes	PNAPM	1998	Manchones Norte	2016	2	18	Yes	Meandrinidae	Meandrina spp.	0	0	0
Pre	Yes	PNAPM	1998	Manchones Norte	2016	2	18	Yes	Meandrinidae	Meandrina spp.	0	0	0
Pre	Yes	PNAPM	1998	Manchones Norte	2016	2	18	Yes	Meandrinidae	Meandrina spp.	0.555556	0	0
Pre	Yes	PNAPM	1998	Manchones Norte	2016	2	18	Yes	Montastraeidae	Montastraea cavernosa	2.77778	0	0
Pre	Yes	PNAPM	1998	Manchones Norte	2016	2	18	No	Mussinae	Mussa angulosa	0	0	0
Pre	Yes	PNAPM	1998	Manchones Norte	2016	2	18	Yes	Mussinae	Mycetophyllia spp.	0	0	0
Pre	Yes	PNAPM	1998	Manchones Norte	2016	2	18	Yes	Mussinae	Mycetophyllia spp.	0	0	0
Pre	Yes	PNAPM	1998	Manchones Norte	2016	2	18	Yes	Mussinae	Mycetophyllia spp.	0	0	0
Pre	Yes	PNAPM	1998	Manchones Norte	2016	2	18	Yes	Mussinae	Mycetophyllia spp.	0	0	0
Pre	Yes	PNAPM	1998	Manchones Norte	2016	2	18	Yes	Mussinae	Mycetophyllia spp.	0	0	0
Pre	Yes	PNAPM	1998	Manchones Norte	2016	2	18	Yes	Merulinidae	Orbicella annularis	2.22222	0	0
Pre	Yes	PNAPM	1998	Manchones Norte	2016	2	18	Yes	Merulinidae	Orbicella faveolata	6.11111	0	0
Pre	Yes	PNAPM	1998	Manchones Norte	2016	2	18	Yes	Merulinidae	Orbicella franksi	0	0	0
Pre	Yes	PNAPM	1998	Manchones Norte	2016	2	18	No	Poritidae	Porites astreoides	4.44444	0	0
Pre	Yes	PNAPM	1998	Manchones Norte	2016	2	18	No	Poritidae	Branching Porites	0	0	0
Pre	Yes	PNAPM	1998	Manchones Norte	2016	2	18	No	Poritidae	Branching Porites	0	0	0
Pre	Yes	PNAPM	1998	Manchones Norte	2016	2	18	No	Poritidae	Branching Porites	0.555556	0	0
Pre	Yes	PNAPM	1998	Manchones Norte	2016	2	18	No	Poritidae	Branching Porites	0	0	0
Pre	Yes	PNAPM	1998	Manchones Norte	2016	2	18	Yes	Faviinae	Pseudodiploria clivosa	0	0	0
Pre	Yes	PNAPM	1998	Manchones Norte	2016	2	18	Yes	Faviinae	Pseudodiploria strigosa	1.11111	0	0
Pre	Yes	PNAPM	1998	Manchones Norte	2016	2	18	No	Mussinae	Scolymia spp.	0	0	0
Pre	Yes	PNAPM	1998	Manchones Norte	2016	2	18	No	Mussinae	Scolymia spp.	0	0	0
Pre	Yes	PNAPM	1998	Manchones Norte	2016	2	18	No	Siderastreidae	Siderastrea radians	0	0	0
Pre	Yes	PNAPM	1998	Manchones Norte	2016	2	18	Yes	Siderastreidae	Siderastrea siderea	1.66667	0	0
Pre	Yes	PNAPM	1998	Manchones Norte	2016	2	18	No	Scleractinia incertae sedis	Solenastrea bournoni	0	0	0
Pre	Yes	PNAPM	1998	Manchones Norte	2016	2	18	No	Astrocoeniidae	Stephanocoenia intersepta	0	0	0
Pre	Yes	RBCM	2016	MS	2016	1	7	No	Acroporidae	Acropora cervicornis	0	0	0
Pre	Yes	RBCM	2016	MS	2016	1	7	No	Acroporidae	Acropora palmata	0	0	0
Pre	Yes	RBCM	2016	MS	2016	1	7	No	Acroporidae	Acropora cervicornis	0	0	0
Pre	Yes	RBCM	2016	MS	2016	1	7	No	Agariciidae	Agaricia (encrusting)	21.4286	0	0
Pre	Yes	RBCM	2016	MS	2016	1	7	No	Agariciidae	Agaricia (encrusting)	0	0	0
Pre	Yes	RBCM	2016	MS	2016	1	7	No	Agariciidae	Agaricia (encrusting)	0	0	0
Pre	Yes	RBCM	2016	MS	2016	1	7	No	Agariciidae	Agaricia (encrusting)	0	0	0
Pre	Yes	RBCM	2016	MS	2016	1	7	No	Agariciidae	Agaricia (encrusting)	1.42857	0	0
Pre	Yes	RBCM	2016	MS	2016	1	7	No	Agariciidae	Agaricia (encrusting)	0	0	0
Pre	Yes	RBCM	2016	MS	2016	1	7	No	Agariciidae	Agaricia tenuifolia	0	0	0
Pre	Yes	RBCM	2016	MS	2016	1	7	Yes	Faviinae	Colpophyllia natans	0	0	0
Pre	Yes	RBCM	2016	MS	2016	1	7	Yes	Meandrinidae	Dendrogyra cylindrus	0	0	0
Pre	Yes	RBCM	2016	MS	2016	1	7	Yes	Meandrinidae	Dichocoenia stokesi	0	0	0
Pre	Yes	RBCM	2016	MS	2016	1	7	Yes	Faviinae	Diploria labyrinthiformis	0	0	0
Pre	Yes	RBCM	2016	MS	2016	1	7	Yes	Meandrinidae	Eusmilia fastigiata	0	0	0
Pre	Yes	RBCM	2016	MS	2016	1	7	No	Faviinae	Favia fragum	0	0	0
Pre	Yes	RBCM	2016	MS	2016	1	7	No	Agariciidae	Helioseris cucullata	1.42857	0	0
Pre	Yes	RBCM	2016	MS	2016	1	7	Yes	Mussinae	Isophyllia spp.	0	0	0
Pre	Yes	RBCM	2016	MS	2016	1	7	Yes	Mussinae	Isophyllia spp.	0	0	0
Pre	Yes	RBCM	2016	MS	2016	1	7	Yes	Mussinae	Isophyllia spp.	0	0	0
Pre	Yes	RBCM	2016	MS	2016	1	7	No	Pocilloporidae	Madracis spp.	0	0	0
Pre	Yes	RBCM	2016	MS	2016	1	7	No	Pocilloporidae	Madracis spp.	0	0	0
Pre	Yes	RBCM	2016	MS	2016	1	7	Yes	Meandrinidae	Meandrina spp.	0	0	0
Pre	Yes	RBCM	2016	MS	2016	1	7	Yes	Meandrinidae	Meandrina spp.	0	0	0
Pre	Yes	RBCM	2016	MS	2016	1	7	Yes	Meandrinidae	Meandrina spp.	0	0	0
Pre	Yes	RBCM	2016	MS	2016	1	7	Yes	Montastraeidae	Montastraea cavernosa	0	0	0
Pre	Yes	RBCM	2016	MS	2016	1	7	No	Mussinae	Mussa angulosa	0	0	0
Pre	Yes	RBCM	2016	MS	2016	1	7	Yes	Mussinae	Mycetophyllia spp.	0	0	0
Pre	Yes	RBCM	2016	MS	2016	1	7	Yes	Mussinae	Mycetophyllia spp.	0	0	0
Pre	Yes	RBCM	2016	MS	2016	1	7	Yes	Mussinae	Mycetophyllia spp.	0	0	0
Pre	Yes	RBCM	2016	MS	2016	1	7	Yes	Mussinae	Mycetophyllia spp.	0	0	0
Pre	Yes	RBCM	2016	MS	2016	1	7	Yes	Mussinae	Mycetophyllia spp.	0	0	0
Pre	Yes	RBCM	2016	MS	2016	1	7	Yes	Merulinidae	Orbicella annularis	0	0	0
Pre	Yes	RBCM	2016	MS	2016	1	7	Yes	Merulinidae	Orbicella faveolata	5.71429	0	0
Pre	Yes	RBCM	2016	MS	2016	1	7	Yes	Merulinidae	Orbicella franksi	4.28571	0	0
Pre	Yes	RBCM	2016	MS	2016	1	7	No	Poritidae	Porites astreoides	14.2857	0	0
Pre	Yes	RBCM	2016	MS	2016	1	7	No	Poritidae	Branching Porites	0	0	0
Pre	Yes	RBCM	2016	MS	2016	1	7	No	Poritidae	Branching Porites	1.42857	0	0
Pre	Yes	RBCM	2016	MS	2016	1	7	No	Poritidae	Branching Porites	1.42857	0	0
Pre	Yes	RBCM	2016	MS	2016	1	7	No	Poritidae	Branching Porites	0	0	0
Pre	Yes	RBCM	2016	MS	2016	1	7	Yes	Faviinae	Pseudodiploria clivosa	0	0	0
Pre	Yes	RBCM	2016	MS	2016	1	7	Yes	Faviinae	Pseudodiploria strigosa	0	0	0
Pre	Yes	RBCM	2016	MS	2016	1	7	No	Mussinae	Scolymia spp.	0	0	0
Pre	Yes	RBCM	2016	MS	2016	1	7	No	Mussinae	Scolymia spp.	0	0	0
Pre	Yes	RBCM	2016	MS	2016	1	7	No	Siderastreidae	Siderastrea radians	0	0	0
Pre	Yes	RBCM	2016	MS	2016	1	7	Yes	Siderastreidae	Siderastrea siderea	2.85714	0	0
Pre	Yes	RBCM	2016	MS	2016	1	7	No	Scleractinia incertae sedis	Solenastrea bournoni	0	0	0
Pre	Yes	RBCM	2016	MS	2016	1	7	No	Astrocoeniidae	Stephanocoenia intersepta	0	0	0
Pre	Yes	RBCM	2016	MX1014	2017	3	19	No	Acroporidae	Acropora cervicornis	0	0	0
Pre	Yes	RBCM	2016	MX1014	2017	3	19	No	Acroporidae	Acropora palmata	0	0	0
Pre	Yes	RBCM	2016	MX1014	2017	3	19	No	Acroporidae	Acropora cervicornis	0	0	0
Pre	Yes	RBCM	2016	MX1014	2017	3	19	No	Agariciidae	Agaricia (encrusting)	16.3158	0	0
Pre	Yes	RBCM	2016	MX1014	2017	3	19	No	Agariciidae	Agaricia (encrusting)	0	0	0
Pre	Yes	RBCM	2016	MX1014	2017	3	19	No	Agariciidae	Agaricia (encrusting)	0	0	0
Pre	Yes	RBCM	2016	MX1014	2017	3	19	No	Agariciidae	Agaricia (encrusting)	0	0	0
Pre	Yes	RBCM	2016	MX1014	2017	3	19	No	Agariciidae	Agaricia (encrusting)	0	0	0
Pre	Yes	RBCM	2016	MX1014	2017	3	19	No	Agariciidae	Agaricia (encrusting)	0	0	0
Pre	Yes	RBCM	2016	MX1014	2017	3	19	No	Agariciidae	Agaricia tenuifolia	0.526316	0	0
Pre	Yes	RBCM	2016	MX1014	2017	3	19	Yes	Faviinae	Colpophyllia natans	0	0	0
Pre	Yes	RBCM	2016	MX1014	2017	3	19	Yes	Meandrinidae	Dendrogyra cylindrus	0	0	0
Pre	Yes	RBCM	2016	MX1014	2017	3	19	Yes	Meandrinidae	Dichocoenia stokesi	0	0	0
Pre	Yes	RBCM	2016	MX1014	2017	3	19	Yes	Faviinae	Diploria labyrinthiformis	0	0	0
Pre	Yes	RBCM	2016	MX1014	2017	3	19	Yes	Meandrinidae	Eusmilia fastigiata	0	0	0
Pre	Yes	RBCM	2016	MX1014	2017	3	19	No	Faviinae	Favia fragum	0	0	0
Pre	Yes	RBCM	2016	MX1014	2017	3	19	No	Agariciidae	Helioseris cucullata	0.526316	0	0
Pre	Yes	RBCM	2016	MX1014	2017	3	19	Yes	Mussinae	Isophyllia spp.	0	0	0
Pre	Yes	RBCM	2016	MX1014	2017	3	19	Yes	Mussinae	Isophyllia spp.	0	0	0
Pre	Yes	RBCM	2016	MX1014	2017	3	19	Yes	Mussinae	Isophyllia spp.	0	0	0
Pre	Yes	RBCM	2016	MX1014	2017	3	19	No	Pocilloporidae	Madracis spp.	0	0	0
Pre	Yes	RBCM	2016	MX1014	2017	3	19	No	Pocilloporidae	Madracis spp.	1.05263	0	0
Pre	Yes	RBCM	2016	MX1014	2017	3	19	Yes	Meandrinidae	Meandrina spp.	0	0	0
Pre	Yes	RBCM	2016	MX1014	2017	3	19	Yes	Meandrinidae	Meandrina spp.	1.05263	0	0
Pre	Yes	RBCM	2016	MX1014	2017	3	19	Yes	Meandrinidae	Meandrina spp.	0	0	0
Pre	Yes	RBCM	2016	MX1014	2017	3	19	Yes	Montastraeidae	Montastraea cavernosa	2.10526	0	0
Pre	Yes	RBCM	2016	MX1014	2017	3	19	No	Mussinae	Mussa angulosa	0	0	0
Pre	Yes	RBCM	2016	MX1014	2017	3	19	Yes	Mussinae	Mycetophyllia spp.	0	0	0
Pre	Yes	RBCM	2016	MX1014	2017	3	19	Yes	Mussinae	Mycetophyllia spp.	0	0	0
Pre	Yes	RBCM	2016	MX1014	2017	3	19	Yes	Mussinae	Mycetophyllia spp.	0	0	0
Pre	Yes	RBCM	2016	MX1014	2017	3	19	Yes	Mussinae	Mycetophyllia spp.	0	0	0
Pre	Yes	RBCM	2016	MX1014	2017	3	19	Yes	Mussinae	Mycetophyllia spp.	0.526316	0	0
Pre	Yes	RBCM	2016	MX1014	2017	3	19	Yes	Merulinidae	Orbicella annularis	1.05263	0	0
Pre	Yes	RBCM	2016	MX1014	2017	3	19	Yes	Merulinidae	Orbicella faveolata	3.15789	0	0
Pre	Yes	RBCM	2016	MX1014	2017	3	19	Yes	Merulinidae	Orbicella franksi	11.0526	0	0
Pre	Yes	RBCM	2016	MX1014	2017	3	19	No	Poritidae	Porites astreoides	4.73684	0	0
Pre	Yes	RBCM	2016	MX1014	2017	3	19	No	Poritidae	Branching Porites	0	0	0
Pre	Yes	RBCM	2016	MX1014	2017	3	19	No	Poritidae	Branching Porites	2.63158	0	0
Pre	Yes	RBCM	2016	MX1014	2017	3	19	No	Poritidae	Branching Porites	1.05263	0	0
Pre	Yes	RBCM	2016	MX1014	2017	3	19	No	Poritidae	Branching Porites	0	0	0
Pre	Yes	RBCM	2016	MX1014	2017	3	19	Yes	Faviinae	Pseudodiploria clivosa	0	0	0
Pre	Yes	RBCM	2016	MX1014	2017	3	19	Yes	Faviinae	Pseudodiploria strigosa	0.526316	0	0
Pre	Yes	RBCM	2016	MX1014	2017	3	19	No	Mussinae	Scolymia spp.	0	0	0
Pre	Yes	RBCM	2016	MX1014	2017	3	19	No	Mussinae	Scolymia spp.	0	0	0
Pre	Yes	RBCM	2016	MX1014	2017	3	19	No	Siderastreidae	Siderastrea radians	0	0	0
Pre	Yes	RBCM	2016	MX1014	2017	3	19	Yes	Siderastreidae	Siderastrea siderea	1.57895	0	0
Pre	Yes	RBCM	2016	MX1014	2017	3	19	No	Scleractinia incertae sedis	Solenastrea bournoni	0	0	0
Pre	Yes	RBCM	2016	MX1014	2017	3	19	No	Astrocoeniidae	Stephanocoenia intersepta	1.57895	0	0
Pre	Yes	RBSK	1986	MX1026	2016	2	10	No	Acroporidae	Acropora cervicornis	2	0	0
Pre	Yes	RBSK	1986	MX1026	2016	2	10	No	Acroporidae	Acropora palmata	0	0	0
Pre	Yes	RBSK	1986	MX1026	2016	2	10	No	Acroporidae	Acropora cervicornis	0	0	0
Pre	Yes	RBSK	1986	MX1026	2016	2	10	No	Agariciidae	Agaricia (encrusting)	40	0	0
Pre	Yes	RBSK	1986	MX1026	2016	2	10	No	Agariciidae	Agaricia (encrusting)	0	0	0
Pre	Yes	RBSK	1986	MX1026	2016	2	10	No	Agariciidae	Agaricia (encrusting)	0	0	0
Pre	Yes	RBSK	1986	MX1026	2016	2	10	No	Agariciidae	Agaricia (encrusting)	0	0	0
Pre	Yes	RBSK	1986	MX1026	2016	2	10	No	Agariciidae	Agaricia (encrusting)	0	0	0
Pre	Yes	RBSK	1986	MX1026	2016	2	10	No	Agariciidae	Agaricia (encrusting)	0	0	0
Pre	Yes	RBSK	1986	MX1026	2016	2	10	No	Agariciidae	Agaricia tenuifolia	0	0	0
Pre	Yes	RBSK	1986	MX1026	2016	2	10	Yes	Faviinae	Colpophyllia natans	2	0	0
Pre	Yes	RBSK	1986	MX1026	2016	2	10	Yes	Meandrinidae	Dendrogyra cylindrus	0	0	0
Pre	Yes	RBSK	1986	MX1026	2016	2	10	Yes	Meandrinidae	Dichocoenia stokesi	1	0	0
Pre	Yes	RBSK	1986	MX1026	2016	2	10	Yes	Faviinae	Diploria labyrinthiformis	0	0	0
Pre	Yes	RBSK	1986	MX1026	2016	2	10	Yes	Meandrinidae	Eusmilia fastigiata	3	0	0
Pre	Yes	RBSK	1986	MX1026	2016	2	10	No	Faviinae	Favia fragum	0	0	0
Pre	Yes	RBSK	1986	MX1026	2016	2	10	No	Agariciidae	Helioseris cucullata	0	0	0
Pre	Yes	RBSK	1986	MX1026	2016	2	10	Yes	Mussinae	Isophyllia spp.	1	0	0
Pre	Yes	RBSK	1986	MX1026	2016	2	10	Yes	Mussinae	Isophyllia spp.	0	0	0
Pre	Yes	RBSK	1986	MX1026	2016	2	10	Yes	Mussinae	Isophyllia spp.	0	0	0
Pre	Yes	RBSK	1986	MX1026	2016	2	10	No	Pocilloporidae	Madracis spp.	0	0	0
Pre	Yes	RBSK	1986	MX1026	2016	2	10	No	Pocilloporidae	Madracis spp.	0	0	0
Pre	Yes	RBSK	1986	MX1026	2016	2	10	Yes	Meandrinidae	Meandrina spp.	0	0	0
Pre	Yes	RBSK	1986	MX1026	2016	2	10	Yes	Meandrinidae	Meandrina spp.	0	0	0
Pre	Yes	RBSK	1986	MX1026	2016	2	10	Yes	Meandrinidae	Meandrina spp.	0	0	0
Pre	Yes	RBSK	1986	MX1026	2016	2	10	Yes	Montastraeidae	Montastraea cavernosa	8	0	0
Pre	Yes	RBSK	1986	MX1026	2016	2	10	No	Mussinae	Mussa angulosa	0	0	0
Pre	Yes	RBSK	1986	MX1026	2016	2	10	Yes	Mussinae	Mycetophyllia spp.	0	0	0
Pre	Yes	RBSK	1986	MX1026	2016	2	10	Yes	Mussinae	Mycetophyllia spp.	0	0	0
Pre	Yes	RBSK	1986	MX1026	2016	2	10	Yes	Mussinae	Mycetophyllia spp.	0	0	0
Pre	Yes	RBSK	1986	MX1026	2016	2	10	Yes	Mussinae	Mycetophyllia spp.	0	0	0
Pre	Yes	RBSK	1986	MX1026	2016	2	10	Yes	Mussinae	Mycetophyllia spp.	0	0	0
Pre	Yes	RBSK	1986	MX1026	2016	2	10	Yes	Merulinidae	Orbicella annularis	0	0	0
Pre	Yes	RBSK	1986	MX1026	2016	2	10	Yes	Merulinidae	Orbicella faveolata	4	0	0
Pre	Yes	RBSK	1986	MX1026	2016	2	10	Yes	Merulinidae	Orbicella franksi	0	0	0
Pre	Yes	RBSK	1986	MX1026	2016	2	10	No	Poritidae	Porites astreoides	19	0	0
Pre	Yes	RBSK	1986	MX1026	2016	2	10	No	Poritidae	Branching Porites	0	0	0
Pre	Yes	RBSK	1986	MX1026	2016	2	10	No	Poritidae	Branching Porites	1	0	0
Pre	Yes	RBSK	1986	MX1026	2016	2	10	No	Poritidae	Branching Porites	0	0	0
Pre	Yes	RBSK	1986	MX1026	2016	2	10	No	Poritidae	Branching Porites	0	0	0
Pre	Yes	RBSK	1986	MX1026	2016	2	10	Yes	Faviinae	Pseudodiploria clivosa	0	0	0
Pre	Yes	RBSK	1986	MX1026	2016	2	10	Yes	Faviinae	Pseudodiploria strigosa	5	0	0
Pre	Yes	RBSK	1986	MX1026	2016	2	10	No	Mussinae	Scolymia spp.	0	0	0
Pre	Yes	RBSK	1986	MX1026	2016	2	10	No	Mussinae	Scolymia spp.	0	0	0
Pre	Yes	RBSK	1986	MX1026	2016	2	10	No	Siderastreidae	Siderastrea radians	1	0	0
Pre	Yes	RBSK	1986	MX1026	2016	2	10	Yes	Siderastreidae	Siderastrea siderea	11	0	0
Pre	Yes	RBSK	1986	MX1026	2016	2	10	No	Scleractinia incertae sedis	Solenastrea bournoni	0	0	0
Pre	Yes	RBSK	1986	MX1026	2016	2	10	No	Astrocoeniidae	Stephanocoenia intersepta	1	0	0
Pre	Yes	RBSK	1986	MX1028	2016	2	17	No	Acroporidae	Acropora cervicornis	0	0	0
Pre	Yes	RBSK	1986	MX1028	2016	2	17	No	Acroporidae	Acropora palmata	0	0	0
Pre	Yes	RBSK	1986	MX1028	2016	2	17	No	Acroporidae	Acropora cervicornis	0	0	0
Pre	Yes	RBSK	1986	MX1028	2016	2	17	No	Agariciidae	Agaricia (encrusting)	25.2941	0	0
Pre	Yes	RBSK	1986	MX1028	2016	2	17	No	Agariciidae	Agaricia (encrusting)	0	0	0
Pre	Yes	RBSK	1986	MX1028	2016	2	17	No	Agariciidae	Agaricia (encrusting)	0	0	0
Pre	Yes	RBSK	1986	MX1028	2016	2	17	No	Agariciidae	Agaricia (encrusting)	0	0	0
Pre	Yes	RBSK	1986	MX1028	2016	2	17	No	Agariciidae	Agaricia (encrusting)	0.588235	0	0
Pre	Yes	RBSK	1986	MX1028	2016	2	17	No	Agariciidae	Agaricia (encrusting)	0	0	0
Pre	Yes	RBSK	1986	MX1028	2016	2	17	No	Agariciidae	Agaricia tenuifolia	0.588235	0	0
Pre	Yes	RBSK	1986	MX1028	2016	2	17	Yes	Faviinae	Colpophyllia natans	0	0	0
Pre	Yes	RBSK	1986	MX1028	2016	2	17	Yes	Meandrinidae	Dendrogyra cylindrus	0	0	0
Pre	Yes	RBSK	1986	MX1028	2016	2	17	Yes	Meandrinidae	Dichocoenia stokesi	1.17647	0	0
Pre	Yes	RBSK	1986	MX1028	2016	2	17	Yes	Faviinae	Diploria labyrinthiformis	0.588235	0	0
Pre	Yes	RBSK	1986	MX1028	2016	2	17	Yes	Meandrinidae	Eusmilia fastigiata	0	0	0
Pre	Yes	RBSK	1986	MX1028	2016	2	17	No	Faviinae	Favia fragum	0	0	0
Pre	Yes	RBSK	1986	MX1028	2016	2	17	No	Agariciidae	Helioseris cucullata	0	0	0
Pre	Yes	RBSK	1986	MX1028	2016	2	17	Yes	Mussinae	Isophyllia spp.	0.588235	0	0
Pre	Yes	RBSK	1986	MX1028	2016	2	17	Yes	Mussinae	Isophyllia spp.	0	0	0
Pre	Yes	RBSK	1986	MX1028	2016	2	17	Yes	Mussinae	Isophyllia spp.	0	0	0
Pre	Yes	RBSK	1986	MX1028	2016	2	17	No	Pocilloporidae	Madracis spp.	0	0	0
Pre	Yes	RBSK	1986	MX1028	2016	2	17	No	Pocilloporidae	Madracis spp.	0.588235	0	0
Pre	Yes	RBSK	1986	MX1028	2016	2	17	Yes	Meandrinidae	Meandrina spp.	0	0	0
Pre	Yes	RBSK	1986	MX1028	2016	2	17	Yes	Meandrinidae	Meandrina spp.	1.17647	0	0
Pre	Yes	RBSK	1986	MX1028	2016	2	17	Yes	Meandrinidae	Meandrina spp.	0	0	0
Pre	Yes	RBSK	1986	MX1028	2016	2	17	Yes	Montastraeidae	Montastraea cavernosa	1.76471	0	0
Pre	Yes	RBSK	1986	MX1028	2016	2	17	No	Mussinae	Mussa angulosa	0	0	0
Pre	Yes	RBSK	1986	MX1028	2016	2	17	Yes	Mussinae	Mycetophyllia spp.	0	0	0
Pre	Yes	RBSK	1986	MX1028	2016	2	17	Yes	Mussinae	Mycetophyllia spp.	0	0	0
Pre	Yes	RBSK	1986	MX1028	2016	2	17	Yes	Mussinae	Mycetophyllia spp.	0	0	0
Pre	Yes	RBSK	1986	MX1028	2016	2	17	Yes	Mussinae	Mycetophyllia spp.	0	0	0
Pre	Yes	RBSK	1986	MX1028	2016	2	17	Yes	Mussinae	Mycetophyllia spp.	0.588235	0	0
Pre	Yes	RBSK	1986	MX1028	2016	2	17	Yes	Merulinidae	Orbicella annularis	0	0	0
Pre	Yes	RBSK	1986	MX1028	2016	2	17	Yes	Merulinidae	Orbicella faveolata	5.88235	0	0
Pre	Yes	RBSK	1986	MX1028	2016	2	17	Yes	Merulinidae	Orbicella franksi	0	0	0
Pre	Yes	RBSK	1986	MX1028	2016	2	17	No	Poritidae	Porites astreoides	5.29412	0	0
Pre	Yes	RBSK	1986	MX1028	2016	2	17	No	Poritidae	Branching Porites	1.17647	0	0
Pre	Yes	RBSK	1986	MX1028	2016	2	17	No	Poritidae	Branching Porites	0	0	0
Pre	Yes	RBSK	1986	MX1028	2016	2	17	No	Poritidae	Branching Porites	1.17647	0	0
Pre	Yes	RBSK	1986	MX1028	2016	2	17	No	Poritidae	Branching Porites	0	0	0
Pre	Yes	RBSK	1986	MX1028	2016	2	17	Yes	Faviinae	Pseudodiploria clivosa	0	0	0
Pre	Yes	RBSK	1986	MX1028	2016	2	17	Yes	Faviinae	Pseudodiploria strigosa	0.588235	0	0
Pre	Yes	RBSK	1986	MX1028	2016	2	17	No	Mussinae	Scolymia spp.	0	0	0
Pre	Yes	RBSK	1986	MX1028	2016	2	17	No	Mussinae	Scolymia spp.	0	0	0
Pre	Yes	RBSK	1986	MX1028	2016	2	17	No	Siderastreidae	Siderastrea radians	0.588235	0	0
Pre	Yes	RBSK	1986	MX1028	2016	2	17	Yes	Siderastreidae	Siderastrea siderea	2.35294	0	0
Pre	Yes	RBSK	1986	MX1028	2016	2	17	No	Scleractinia incertae sedis	Solenastrea bournoni	0	0	0
Pre	Yes	RBSK	1986	MX1028	2016	2	17	No	Astrocoeniidae	Stephanocoenia intersepta	0.588235	0	0
Pre	Yes	RBCM	2016	MX1047	2016	2	14	No	Acroporidae	Acropora cervicornis	0	0	0
Pre	Yes	RBCM	2016	MX1047	2016	2	14	No	Acroporidae	Acropora palmata	0	0	0
Pre	Yes	RBCM	2016	MX1047	2016	2	14	No	Acroporidae	Acropora cervicornis	0	0	0
Pre	Yes	RBCM	2016	MX1047	2016	2	14	No	Agariciidae	Agaricia (encrusting)	23.5714	0	0
Pre	Yes	RBCM	2016	MX1047	2016	2	14	No	Agariciidae	Agaricia (encrusting)	0	0	0
Pre	Yes	RBCM	2016	MX1047	2016	2	14	No	Agariciidae	Agaricia (encrusting)	0	0	0
Pre	Yes	RBCM	2016	MX1047	2016	2	14	No	Agariciidae	Agaricia (encrusting)	2.85714	0	0
Pre	Yes	RBCM	2016	MX1047	2016	2	14	No	Agariciidae	Agaricia (encrusting)	1.42857	0	0
Pre	Yes	RBCM	2016	MX1047	2016	2	14	No	Agariciidae	Agaricia (encrusting)	0	0	0
Pre	Yes	RBCM	2016	MX1047	2016	2	14	No	Agariciidae	Agaricia tenuifolia	0	0	0
Pre	Yes	RBCM	2016	MX1047	2016	2	14	Yes	Faviinae	Colpophyllia natans	0	0	0
Pre	Yes	RBCM	2016	MX1047	2016	2	14	Yes	Meandrinidae	Dendrogyra cylindrus	0	0	0
Pre	Yes	RBCM	2016	MX1047	2016	2	14	Yes	Meandrinidae	Dichocoenia stokesi	3.57143	0	0
Pre	Yes	RBCM	2016	MX1047	2016	2	14	Yes	Faviinae	Diploria labyrinthiformis	0.714286	0	0
Pre	Yes	RBCM	2016	MX1047	2016	2	14	Yes	Meandrinidae	Eusmilia fastigiata	0	0	0
Pre	Yes	RBCM	2016	MX1047	2016	2	14	No	Faviinae	Favia fragum	0	0	0
Pre	Yes	RBCM	2016	MX1047	2016	2	14	No	Agariciidae	Helioseris cucullata	0	0	0
Pre	Yes	RBCM	2016	MX1047	2016	2	14	Yes	Mussinae	Isophyllia spp.	0	0	0
Pre	Yes	RBCM	2016	MX1047	2016	2	14	Yes	Mussinae	Isophyllia spp.	0	0	0
Pre	Yes	RBCM	2016	MX1047	2016	2	14	Yes	Mussinae	Isophyllia spp.	0	0	0
Pre	Yes	RBCM	2016	MX1047	2016	2	14	No	Pocilloporidae	Madracis spp.	0	0	0
Pre	Yes	RBCM	2016	MX1047	2016	2	14	No	Pocilloporidae	Madracis spp.	0	0	0
Pre	Yes	RBCM	2016	MX1047	2016	2	14	Yes	Meandrinidae	Meandrina spp.	0	0	0
Pre	Yes	RBCM	2016	MX1047	2016	2	14	Yes	Meandrinidae	Meandrina spp.	0	0	0
Pre	Yes	RBCM	2016	MX1047	2016	2	14	Yes	Meandrinidae	Meandrina spp.	0	0	0
Pre	Yes	RBCM	2016	MX1047	2016	2	14	Yes	Montastraeidae	Montastraea cavernosa	1.42857	0	0
Pre	Yes	RBCM	2016	MX1047	2016	2	14	No	Mussinae	Mussa angulosa	0	0	0
Pre	Yes	RBCM	2016	MX1047	2016	2	14	Yes	Mussinae	Mycetophyllia spp.	0	0	0
Pre	Yes	RBCM	2016	MX1047	2016	2	14	Yes	Mussinae	Mycetophyllia spp.	0	0	0
Pre	Yes	RBCM	2016	MX1047	2016	2	14	Yes	Mussinae	Mycetophyllia spp.	0	0	0
Pre	Yes	RBCM	2016	MX1047	2016	2	14	Yes	Mussinae	Mycetophyllia spp.	0	0	0
Pre	Yes	RBCM	2016	MX1047	2016	2	14	Yes	Mussinae	Mycetophyllia spp.	0	0	0
Pre	Yes	RBCM	2016	MX1047	2016	2	14	Yes	Merulinidae	Orbicella annularis	0	0	0
Pre	Yes	RBCM	2016	MX1047	2016	2	14	Yes	Merulinidae	Orbicella faveolata	3.57143	0	0
Pre	Yes	RBCM	2016	MX1047	2016	2	14	Yes	Merulinidae	Orbicella franksi	0	0	0
Pre	Yes	RBCM	2016	MX1047	2016	2	14	No	Poritidae	Porites astreoides	10.7143	0	0
Pre	Yes	RBCM	2016	MX1047	2016	2	14	No	Poritidae	Branching Porites	0	0	0
Pre	Yes	RBCM	2016	MX1047	2016	2	14	No	Poritidae	Branching Porites	1.42857	0	0
Pre	Yes	RBCM	2016	MX1047	2016	2	14	No	Poritidae	Branching Porites	0.714286	0	0
Pre	Yes	RBCM	2016	MX1047	2016	2	14	No	Poritidae	Branching Porites	0	0	0
Pre	Yes	RBCM	2016	MX1047	2016	2	14	Yes	Faviinae	Pseudodiploria clivosa	0	0	0
Pre	Yes	RBCM	2016	MX1047	2016	2	14	Yes	Faviinae	Pseudodiploria strigosa	4.28571	0	0
Pre	Yes	RBCM	2016	MX1047	2016	2	14	No	Mussinae	Scolymia spp.	0	0	0
Pre	Yes	RBCM	2016	MX1047	2016	2	14	No	Mussinae	Scolymia spp.	0.714286	0	0
Pre	Yes	RBCM	2016	MX1047	2016	2	14	No	Siderastreidae	Siderastrea radians	2.14286	0	0
Pre	Yes	RBCM	2016	MX1047	2016	2	14	Yes	Siderastreidae	Siderastrea siderea	12.1429	0	0
Pre	Yes	RBCM	2016	MX1047	2016	2	14	No	Scleractinia incertae sedis	Solenastrea bournoni	0	0	0
Pre	Yes	RBCM	2016	MX1047	2016	2	14	No	Astrocoeniidae	Stephanocoenia intersepta	2.85714	0	0
Pre	Yes	PNCOIMPCPN	1996	MX1134	2016	2	10	No	Acroporidae	Acropora cervicornis	0	0	0
Pre	Yes	PNCOIMPCPN	1996	MX1134	2016	2	10	No	Acroporidae	Acropora palmata	3	0	0
Pre	Yes	PNCOIMPCPN	1996	MX1134	2016	2	10	No	Acroporidae	Acropora cervicornis	0	0	0
Pre	Yes	PNCOIMPCPN	1996	MX1134	2016	2	10	No	Agariciidae	Agaricia (encrusting)	10	0	0
Pre	Yes	PNCOIMPCPN	1996	MX1134	2016	2	10	No	Agariciidae	Agaricia (encrusting)	0	0	0
Pre	Yes	PNCOIMPCPN	1996	MX1134	2016	2	10	No	Agariciidae	Agaricia (encrusting)	0	0	0
Pre	Yes	PNCOIMPCPN	1996	MX1134	2016	2	10	No	Agariciidae	Agaricia (encrusting)	0	0	0
Pre	Yes	PNCOIMPCPN	1996	MX1134	2016	2	10	No	Agariciidae	Agaricia (encrusting)	0	0	0
Pre	Yes	PNCOIMPCPN	1996	MX1134	2016	2	10	No	Agariciidae	Agaricia (encrusting)	0	0	0
Pre	Yes	PNCOIMPCPN	1996	MX1134	2016	2	10	No	Agariciidae	Agaricia tenuifolia	0	0	0
Pre	Yes	PNCOIMPCPN	1996	MX1134	2016	2	10	Yes	Faviinae	Colpophyllia natans	0	0	0
Pre	Yes	PNCOIMPCPN	1996	MX1134	2016	2	10	Yes	Meandrinidae	Dendrogyra cylindrus	0	0	0
Pre	Yes	PNCOIMPCPN	1996	MX1134	2016	2	10	Yes	Meandrinidae	Dichocoenia stokesi	0	0	0
Pre	Yes	PNCOIMPCPN	1996	MX1134	2016	2	10	Yes	Faviinae	Diploria labyrinthiformis	1	0	0
Pre	Yes	PNCOIMPCPN	1996	MX1134	2016	2	10	Yes	Meandrinidae	Eusmilia fastigiata	0	0	0
Pre	Yes	PNCOIMPCPN	1996	MX1134	2016	2	10	No	Faviinae	Favia fragum	0	0	0
Pre	Yes	PNCOIMPCPN	1996	MX1134	2016	2	10	No	Agariciidae	Helioseris cucullata	0	0	0
Pre	Yes	PNCOIMPCPN	1996	MX1134	2016	2	10	Yes	Mussinae	Isophyllia spp.	0	0	0
Pre	Yes	PNCOIMPCPN	1996	MX1134	2016	2	10	Yes	Mussinae	Isophyllia spp.	0	0	0
Pre	Yes	PNCOIMPCPN	1996	MX1134	2016	2	10	Yes	Mussinae	Isophyllia spp.	0	0	0
Pre	Yes	PNCOIMPCPN	1996	MX1134	2016	2	10	No	Pocilloporidae	Madracis spp.	0	0	0
Pre	Yes	PNCOIMPCPN	1996	MX1134	2016	2	10	No	Pocilloporidae	Madracis spp.	0	0	0
Pre	Yes	PNCOIMPCPN	1996	MX1134	2016	2	10	Yes	Meandrinidae	Meandrina spp.	0	0	0
Pre	Yes	PNCOIMPCPN	1996	MX1134	2016	2	10	Yes	Meandrinidae	Meandrina spp.	0	0	0
Pre	Yes	PNCOIMPCPN	1996	MX1134	2016	2	10	Yes	Meandrinidae	Meandrina spp.	0	0	0
Pre	Yes	PNCOIMPCPN	1996	MX1134	2016	2	10	Yes	Montastraeidae	Montastraea cavernosa	0	0	0
Pre	Yes	PNCOIMPCPN	1996	MX1134	2016	2	10	No	Mussinae	Mussa angulosa	0	0	0
Pre	Yes	PNCOIMPCPN	1996	MX1134	2016	2	10	Yes	Mussinae	Mycetophyllia spp.	0	0	0
Pre	Yes	PNCOIMPCPN	1996	MX1134	2016	2	10	Yes	Mussinae	Mycetophyllia spp.	0	0	0
Pre	Yes	PNCOIMPCPN	1996	MX1134	2016	2	10	Yes	Mussinae	Mycetophyllia spp.	0	0	0
Pre	Yes	PNCOIMPCPN	1996	MX1134	2016	2	10	Yes	Mussinae	Mycetophyllia spp.	0	0	0
Pre	Yes	PNCOIMPCPN	1996	MX1134	2016	2	10	Yes	Mussinae	Mycetophyllia spp.	0	0	0
Pre	Yes	PNCOIMPCPN	1996	MX1134	2016	2	10	Yes	Merulinidae	Orbicella annularis	0	0	0
Pre	Yes	PNCOIMPCPN	1996	MX1134	2016	2	10	Yes	Merulinidae	Orbicella faveolata	0	0	0
Pre	Yes	PNCOIMPCPN	1996	MX1134	2016	2	10	Yes	Merulinidae	Orbicella franksi	0	0	0
Pre	Yes	PNCOIMPCPN	1996	MX1134	2016	2	10	No	Poritidae	Porites astreoides	29	0	0
Pre	Yes	PNCOIMPCPN	1996	MX1134	2016	2	10	No	Poritidae	Branching Porites	0	0	0
Pre	Yes	PNCOIMPCPN	1996	MX1134	2016	2	10	No	Poritidae	Branching Porites	0	0	0
Pre	Yes	PNCOIMPCPN	1996	MX1134	2016	2	10	No	Poritidae	Branching Porites	2	0	0
Pre	Yes	PNCOIMPCPN	1996	MX1134	2016	2	10	No	Poritidae	Branching Porites	0	0	0
Pre	Yes	PNCOIMPCPN	1996	MX1134	2016	2	10	Yes	Faviinae	Pseudodiploria clivosa	0	0	0
Pre	Yes	PNCOIMPCPN	1996	MX1134	2016	2	10	Yes	Faviinae	Pseudodiploria strigosa	0	0	0
Pre	Yes	PNCOIMPCPN	1996	MX1134	2016	2	10	No	Mussinae	Scolymia spp.	0	0	0
Pre	Yes	PNCOIMPCPN	1996	MX1134	2016	2	10	No	Mussinae	Scolymia spp.	0	0	0
Pre	Yes	PNCOIMPCPN	1996	MX1134	2016	2	10	No	Siderastreidae	Siderastrea radians	0	0	0
Pre	Yes	PNCOIMPCPN	1996	MX1134	2016	2	10	Yes	Siderastreidae	Siderastrea siderea	2	0	0
Pre	Yes	PNCOIMPCPN	1996	MX1134	2016	2	10	No	Scleractinia incertae sedis	Solenastrea bournoni	0	0	0
Pre	Yes	PNCOIMPCPN	1996	MX1134	2016	2	10	No	Astrocoeniidae	Stephanocoenia intersepta	0	0	0
Pre	Yes	RBCM	2016	MX2052	2017	3	28	No	Acroporidae	Acropora cervicornis	0	0	0
Pre	Yes	RBCM	2016	MX2052	2017	3	28	No	Acroporidae	Acropora palmata	0	0	0
Pre	Yes	RBCM	2016	MX2052	2017	3	28	No	Acroporidae	Acropora cervicornis	0	0	0
Pre	Yes	RBCM	2016	MX2052	2017	3	28	No	Agariciidae	Agaricia (encrusting)	23.2143	0	0
Pre	Yes	RBCM	2016	MX2052	2017	3	28	No	Agariciidae	Agaricia (encrusting)	0	0	0
Pre	Yes	RBCM	2016	MX2052	2017	3	28	No	Agariciidae	Agaricia (encrusting)	0	0	0
Pre	Yes	RBCM	2016	MX2052	2017	3	28	No	Agariciidae	Agaricia (encrusting)	0.357143	0	0
Pre	Yes	RBCM	2016	MX2052	2017	3	28	No	Agariciidae	Agaricia (encrusting)	1.42857	0	0
Pre	Yes	RBCM	2016	MX2052	2017	3	28	No	Agariciidae	Agaricia (encrusting)	0	0	0
Pre	Yes	RBCM	2016	MX2052	2017	3	28	No	Agariciidae	Agaricia tenuifolia	0	0	0
Pre	Yes	RBCM	2016	MX2052	2017	3	28	Yes	Faviinae	Colpophyllia natans	0	0	0
Pre	Yes	RBCM	2016	MX2052	2017	3	28	Yes	Meandrinidae	Dendrogyra cylindrus	0	0	0
Pre	Yes	RBCM	2016	MX2052	2017	3	28	Yes	Meandrinidae	Dichocoenia stokesi	0	0	0
Pre	Yes	RBCM	2016	MX2052	2017	3	28	Yes	Faviinae	Diploria labyrinthiformis	0.357143	0	0
Pre	Yes	RBCM	2016	MX2052	2017	3	28	Yes	Meandrinidae	Eusmilia fastigiata	0	0	0
Pre	Yes	RBCM	2016	MX2052	2017	3	28	No	Faviinae	Favia fragum	0	0	0
Pre	Yes	RBCM	2016	MX2052	2017	3	28	No	Agariciidae	Helioseris cucullata	0.714286	0	0
Pre	Yes	RBCM	2016	MX2052	2017	3	28	Yes	Mussinae	Isophyllia spp.	0	0	0
Pre	Yes	RBCM	2016	MX2052	2017	3	28	Yes	Mussinae	Isophyllia spp.	0	0	0
Pre	Yes	RBCM	2016	MX2052	2017	3	28	Yes	Mussinae	Isophyllia spp.	0	0	0
Pre	Yes	RBCM	2016	MX2052	2017	3	28	No	Pocilloporidae	Madracis spp.	0	0	0
Pre	Yes	RBCM	2016	MX2052	2017	3	28	No	Pocilloporidae	Madracis spp.	0.357143	0	0
Pre	Yes	RBCM	2016	MX2052	2017	3	28	Yes	Meandrinidae	Meandrina spp.	0	0	0
Pre	Yes	RBCM	2016	MX2052	2017	3	28	Yes	Meandrinidae	Meandrina spp.	0.714286	0	0
Pre	Yes	RBCM	2016	MX2052	2017	3	28	Yes	Meandrinidae	Meandrina spp.	0	0	0
Pre	Yes	RBCM	2016	MX2052	2017	3	28	Yes	Montastraeidae	Montastraea cavernosa	1.07143	0	0
Pre	Yes	RBCM	2016	MX2052	2017	3	28	No	Mussinae	Mussa angulosa	0	0	0
Pre	Yes	RBCM	2016	MX2052	2017	3	28	Yes	Mussinae	Mycetophyllia spp.	0	0	0
Pre	Yes	RBCM	2016	MX2052	2017	3	28	Yes	Mussinae	Mycetophyllia spp.	0	0	0
Pre	Yes	RBCM	2016	MX2052	2017	3	28	Yes	Mussinae	Mycetophyllia spp.	0	0	0
Pre	Yes	RBCM	2016	MX2052	2017	3	28	Yes	Mussinae	Mycetophyllia spp.	0	0	0
Pre	Yes	RBCM	2016	MX2052	2017	3	28	Yes	Mussinae	Mycetophyllia spp.	2.14286	0	0
Pre	Yes	RBCM	2016	MX2052	2017	3	28	Yes	Merulinidae	Orbicella annularis	5.35714	0	0
Pre	Yes	RBCM	2016	MX2052	2017	3	28	Yes	Merulinidae	Orbicella faveolata	7.85714	0	0
Pre	Yes	RBCM	2016	MX2052	2017	3	28	Yes	Merulinidae	Orbicella franksi	1.07143	0	0
Pre	Yes	RBCM	2016	MX2052	2017	3	28	No	Poritidae	Porites astreoides	3.57143	0	0
Pre	Yes	RBCM	2016	MX2052	2017	3	28	No	Poritidae	Branching Porites	0	0	0
Pre	Yes	RBCM	2016	MX2052	2017	3	28	No	Poritidae	Branching Porites	0	0	0
Pre	Yes	RBCM	2016	MX2052	2017	3	28	No	Poritidae	Branching Porites	3.57143	0	0
Pre	Yes	RBCM	2016	MX2052	2017	3	28	No	Poritidae	Branching Porites	0	0	0
Pre	Yes	RBCM	2016	MX2052	2017	3	28	Yes	Faviinae	Pseudodiploria clivosa	0	0	0
Pre	Yes	RBCM	2016	MX2052	2017	3	28	Yes	Faviinae	Pseudodiploria strigosa	0.357143	0	0
Pre	Yes	RBCM	2016	MX2052	2017	3	28	No	Mussinae	Scolymia spp.	0	0	0
Pre	Yes	RBCM	2016	MX2052	2017	3	28	No	Mussinae	Scolymia spp.	0	0	0
Pre	Yes	RBCM	2016	MX2052	2017	3	28	No	Siderastreidae	Siderastrea radians	0.357143	0	0
Pre	Yes	RBCM	2016	MX2052	2017	3	28	Yes	Siderastreidae	Siderastrea siderea	0.714286	0	0
Pre	Yes	RBCM	2016	MX2052	2017	3	28	No	Scleractinia incertae sedis	Solenastrea bournoni	0	0	0
Pre	Yes	RBCM	2016	MX2052	2017	3	28	No	Astrocoeniidae	Stephanocoenia intersepta	1.42857	0	0
Pre	Yes	APFFIC	2012	MX3054	2016	2	12	No	Acroporidae	Acropora cervicornis	0	0	0
Pre	Yes	APFFIC	2012	MX3054	2016	2	12	No	Acroporidae	Acropora palmata	0	0	0
Pre	Yes	APFFIC	2012	MX3054	2016	2	12	No	Acroporidae	Acropora cervicornis	0	0	0
Pre	Yes	APFFIC	2012	MX3054	2016	2	12	No	Agariciidae	Agaricia (encrusting)	53.3333	0	0
Pre	Yes	APFFIC	2012	MX3054	2016	2	12	No	Agariciidae	Agaricia (encrusting)	0	0	0
Pre	Yes	APFFIC	2012	MX3054	2016	2	12	No	Agariciidae	Agaricia (encrusting)	0	0	0
Pre	Yes	APFFIC	2012	MX3054	2016	2	12	No	Agariciidae	Agaricia (encrusting)	0.833333	0	0
Pre	Yes	APFFIC	2012	MX3054	2016	2	12	No	Agariciidae	Agaricia (encrusting)	0	0	0
Pre	Yes	APFFIC	2012	MX3054	2016	2	12	No	Agariciidae	Agaricia (encrusting)	1.66667	0	0
Pre	Yes	APFFIC	2012	MX3054	2016	2	12	No	Agariciidae	Agaricia tenuifolia	4.16667	0	0
Pre	Yes	APFFIC	2012	MX3054	2016	2	12	Yes	Faviinae	Colpophyllia natans	0	0	0
Pre	Yes	APFFIC	2012	MX3054	2016	2	12	Yes	Meandrinidae	Dendrogyra cylindrus	0	0	0
Pre	Yes	APFFIC	2012	MX3054	2016	2	12	Yes	Meandrinidae	Dichocoenia stokesi	0.833333	0	0
Pre	Yes	APFFIC	2012	MX3054	2016	2	12	Yes	Faviinae	Diploria labyrinthiformis	0	0	0
Pre	Yes	APFFIC	2012	MX3054	2016	2	12	Yes	Meandrinidae	Eusmilia fastigiata	0.833333	0	0
Pre	Yes	APFFIC	2012	MX3054	2016	2	12	No	Faviinae	Favia fragum	0	0	0
Pre	Yes	APFFIC	2012	MX3054	2016	2	12	No	Agariciidae	Helioseris cucullata	0	0	0
Pre	Yes	APFFIC	2012	MX3054	2016	2	12	Yes	Mussinae	Isophyllia spp.	0	0	0
Pre	Yes	APFFIC	2012	MX3054	2016	2	12	Yes	Mussinae	Isophyllia spp.	0	0	0
Pre	Yes	APFFIC	2012	MX3054	2016	2	12	Yes	Mussinae	Isophyllia spp.	0	0	0
Pre	Yes	APFFIC	2012	MX3054	2016	2	12	No	Pocilloporidae	Madracis spp.	0	0	0
Pre	Yes	APFFIC	2012	MX3054	2016	2	12	No	Pocilloporidae	Madracis spp.	0	0	0
Pre	Yes	APFFIC	2012	MX3054	2016	2	12	Yes	Meandrinidae	Meandrina spp.	0	0	0
Pre	Yes	APFFIC	2012	MX3054	2016	2	12	Yes	Meandrinidae	Meandrina spp.	1.66667	0	0
Pre	Yes	APFFIC	2012	MX3054	2016	2	12	Yes	Meandrinidae	Meandrina spp.	0	0	0
Pre	Yes	APFFIC	2012	MX3054	2016	2	12	Yes	Montastraeidae	Montastraea cavernosa	4.16667	0	0
Pre	Yes	APFFIC	2012	MX3054	2016	2	12	No	Mussinae	Mussa angulosa	0	0	0
Pre	Yes	APFFIC	2012	MX3054	2016	2	12	Yes	Mussinae	Mycetophyllia spp.	0	0	0
Pre	Yes	APFFIC	2012	MX3054	2016	2	12	Yes	Mussinae	Mycetophyllia spp.	0	0	0
Pre	Yes	APFFIC	2012	MX3054	2016	2	12	Yes	Mussinae	Mycetophyllia spp.	0	0	0
Pre	Yes	APFFIC	2012	MX3054	2016	2	12	Yes	Mussinae	Mycetophyllia spp.	0	0	0
Pre	Yes	APFFIC	2012	MX3054	2016	2	12	Yes	Mussinae	Mycetophyllia spp.	0	0	0
Pre	Yes	APFFIC	2012	MX3054	2016	2	12	Yes	Merulinidae	Orbicella annularis	0	0	0
Pre	Yes	APFFIC	2012	MX3054	2016	2	12	Yes	Merulinidae	Orbicella faveolata	0	0	0
Pre	Yes	APFFIC	2012	MX3054	2016	2	12	Yes	Merulinidae	Orbicella franksi	0	0	0
Pre	Yes	APFFIC	2012	MX3054	2016	2	12	No	Poritidae	Porites astreoides	8.33333	0	0
Pre	Yes	APFFIC	2012	MX3054	2016	2	12	No	Poritidae	Branching Porites	0.833333	0	0
Pre	Yes	APFFIC	2012	MX3054	2016	2	12	No	Poritidae	Branching Porites	0	0	0
Pre	Yes	APFFIC	2012	MX3054	2016	2	12	No	Poritidae	Branching Porites	0	0	0
Pre	Yes	APFFIC	2012	MX3054	2016	2	12	No	Poritidae	Branching Porites	0.833333	0	0
Pre	Yes	APFFIC	2012	MX3054	2016	2	12	Yes	Faviinae	Pseudodiploria clivosa	0	0	0
Pre	Yes	APFFIC	2012	MX3054	2016	2	12	Yes	Faviinae	Pseudodiploria strigosa	0	0	0
Pre	Yes	APFFIC	2012	MX3054	2016	2	12	No	Mussinae	Scolymia spp.	0	0	0
Pre	Yes	APFFIC	2012	MX3054	2016	2	12	No	Mussinae	Scolymia spp.	0	0	0
Pre	Yes	APFFIC	2012	MX3054	2016	2	12	No	Siderastreidae	Siderastrea radians	0	0	0
Pre	Yes	APFFIC	2012	MX3054	2016	2	12	Yes	Siderastreidae	Siderastrea siderea	3.33333	0	0
Pre	Yes	APFFIC	2012	MX3054	2016	2	12	No	Scleractinia incertae sedis	Solenastrea bournoni	0	0	0
Pre	Yes	APFFIC	2012	MX3054	2016	2	12	No	Astrocoeniidae	Stephanocoenia intersepta	1.66667	0	0
Pre	Yes	PNAC	1996	Paraiso	2016/2017	4	19	No	Acroporidae	Acropora cervicornis	0	0	0
Pre	Yes	PNAC	1996	Paraiso	2016/2017	4	19	No	Acroporidae	Acropora palmata	0	0	0
Pre	Yes	PNAC	1996	Paraiso	2016/2017	4	19	No	Acroporidae	Acropora cervicornis	0	0	0
Pre	Yes	PNAC	1996	Paraiso	2016/2017	4	19	No	Agariciidae	Agaricia (encrusting)	14.7368	0	0
Pre	Yes	PNAC	1996	Paraiso	2016/2017	4	19	No	Agariciidae	Agaricia (encrusting)	0	0	0
Pre	Yes	PNAC	1996	Paraiso	2016/2017	4	19	No	Agariciidae	Agaricia (encrusting)	0	0	0
Pre	Yes	PNAC	1996	Paraiso	2016/2017	4	19	No	Agariciidae	Agaricia (encrusting)	0.526316	0	0
Pre	Yes	PNAC	1996	Paraiso	2016/2017	4	19	No	Agariciidae	Agaricia (encrusting)	0	0	0
Pre	Yes	PNAC	1996	Paraiso	2016/2017	4	19	No	Agariciidae	Agaricia (encrusting)	0	0	0
Pre	Yes	PNAC	1996	Paraiso	2016/2017	4	19	No	Agariciidae	Agaricia tenuifolia	3.15789	0	0
Pre	Yes	PNAC	1996	Paraiso	2016/2017	4	19	Yes	Faviinae	Colpophyllia natans	0	0	0
Pre	Yes	PNAC	1996	Paraiso	2016/2017	4	19	Yes	Meandrinidae	Dendrogyra cylindrus	0	0	0
Pre	Yes	PNAC	1996	Paraiso	2016/2017	4	19	Yes	Meandrinidae	Dichocoenia stokesi	0.526316	0	0
Pre	Yes	PNAC	1996	Paraiso	2016/2017	4	19	Yes	Faviinae	Diploria labyrinthiformis	0.526316	0	0
Pre	Yes	PNAC	1996	Paraiso	2016/2017	4	19	Yes	Meandrinidae	Eusmilia fastigiata	2.10526	0	0
Pre	Yes	PNAC	1996	Paraiso	2016/2017	4	19	No	Faviinae	Favia fragum	0	0	0
Pre	Yes	PNAC	1996	Paraiso	2016/2017	4	19	No	Agariciidae	Helioseris cucullata	0	0	0
Pre	Yes	PNAC	1996	Paraiso	2016/2017	4	19	Yes	Mussinae	Isophyllia spp.	0	0	0
Pre	Yes	PNAC	1996	Paraiso	2016/2017	4	19	Yes	Mussinae	Isophyllia spp.	0	0	0
Pre	Yes	PNAC	1996	Paraiso	2016/2017	4	19	Yes	Mussinae	Isophyllia spp.	0	0	0
Pre	Yes	PNAC	1996	Paraiso	2016/2017	4	19	No	Pocilloporidae	Madracis spp.	0.526316	0	0
Pre	Yes	PNAC	1996	Paraiso	2016/2017	4	19	No	Pocilloporidae	Madracis spp.	1.05263	0	0
Pre	Yes	PNAC	1996	Paraiso	2016/2017	4	19	Yes	Meandrinidae	Meandrina spp.	0	0	0
Pre	Yes	PNAC	1996	Paraiso	2016/2017	4	19	Yes	Meandrinidae	Meandrina spp.	1.05263	0	0
Pre	Yes	PNAC	1996	Paraiso	2016/2017	4	19	Yes	Meandrinidae	Meandrina spp.	0	0	0
Pre	Yes	PNAC	1996	Paraiso	2016/2017	4	19	Yes	Montastraeidae	Montastraea cavernosa	3.15789	0	0
Pre	Yes	PNAC	1996	Paraiso	2016/2017	4	19	No	Mussinae	Mussa angulosa	0	0	0
Pre	Yes	PNAC	1996	Paraiso	2016/2017	4	19	Yes	Mussinae	Mycetophyllia spp.	0	0	0
Pre	Yes	PNAC	1996	Paraiso	2016/2017	4	19	Yes	Mussinae	Mycetophyllia spp.	0	0	0
Pre	Yes	PNAC	1996	Paraiso	2016/2017	4	19	Yes	Mussinae	Mycetophyllia spp.	0	0	0
Pre	Yes	PNAC	1996	Paraiso	2016/2017	4	19	Yes	Mussinae	Mycetophyllia spp.	0	0	0
Pre	Yes	PNAC	1996	Paraiso	2016/2017	4	19	Yes	Mussinae	Mycetophyllia spp.	0	0	0
Pre	Yes	PNAC	1996	Paraiso	2016/2017	4	19	Yes	Merulinidae	Orbicella annularis	0.526316	0	0
Pre	Yes	PNAC	1996	Paraiso	2016/2017	4	19	Yes	Merulinidae	Orbicella faveolata	5.26316	0	0
Pre	Yes	PNAC	1996	Paraiso	2016/2017	4	19	Yes	Merulinidae	Orbicella franksi	0.526316	0	0
Pre	Yes	PNAC	1996	Paraiso	2016/2017	4	19	No	Poritidae	Porites astreoides	16.3158	0	0
Pre	Yes	PNAC	1996	Paraiso	2016/2017	4	19	No	Poritidae	Branching Porites	0	0	0
Pre	Yes	PNAC	1996	Paraiso	2016/2017	4	19	No	Poritidae	Branching Porites	0	0	0
Pre	Yes	PNAC	1996	Paraiso	2016/2017	4	19	No	Poritidae	Branching Porites	0	0	0
Pre	Yes	PNAC	1996	Paraiso	2016/2017	4	19	No	Poritidae	Branching Porites	0	0	0
Pre	Yes	PNAC	1996	Paraiso	2016/2017	4	19	Yes	Faviinae	Pseudodiploria clivosa	0	0	0
Pre	Yes	PNAC	1996	Paraiso	2016/2017	4	19	Yes	Faviinae	Pseudodiploria strigosa	1.57895	0	0
Pre	Yes	PNAC	1996	Paraiso	2016/2017	4	19	No	Mussinae	Scolymia spp.	0	0	0
Pre	Yes	PNAC	1996	Paraiso	2016/2017	4	19	No	Mussinae	Scolymia spp.	0	0	0
Pre	Yes	PNAC	1996	Paraiso	2016/2017	4	19	No	Siderastreidae	Siderastrea radians	2.10526	0	0
Pre	Yes	PNAC	1996	Paraiso	2016/2017	4	19	Yes	Siderastreidae	Siderastrea siderea	10.5263	0	0
Pre	Yes	PNAC	1996	Paraiso	2016/2017	4	19	No	Scleractinia incertae sedis	Solenastrea bournoni	0	0	0
Pre	Yes	PNAC	1996	Paraiso	2016/2017	4	19	No	Astrocoeniidae	Stephanocoenia intersepta	1.05263	0	0
Pre	Yes	RBCM	2016	Paraiso Puerto Aventuras	2017	3	23	No	Acroporidae	Acropora cervicornis	0	0	0
Pre	Yes	RBCM	2016	Paraiso Puerto Aventuras	2017	3	23	No	Acroporidae	Acropora palmata	0	0	0
Pre	Yes	RBCM	2016	Paraiso Puerto Aventuras	2017	3	23	No	Acroporidae	Acropora cervicornis	0	0	0
Pre	Yes	RBCM	2016	Paraiso Puerto Aventuras	2017	3	23	No	Agariciidae	Agaricia (encrusting)	19.1304	0	0
Pre	Yes	RBCM	2016	Paraiso Puerto Aventuras	2017	3	23	No	Agariciidae	Agaricia (encrusting)	0	0	0
Pre	Yes	RBCM	2016	Paraiso Puerto Aventuras	2017	3	23	No	Agariciidae	Agaricia (encrusting)	0	0	0
Pre	Yes	RBCM	2016	Paraiso Puerto Aventuras	2017	3	23	No	Agariciidae	Agaricia (encrusting)	0.434783	0	0
Pre	Yes	RBCM	2016	Paraiso Puerto Aventuras	2017	3	23	No	Agariciidae	Agaricia (encrusting)	1.30435	0	0
Pre	Yes	RBCM	2016	Paraiso Puerto Aventuras	2017	3	23	No	Agariciidae	Agaricia (encrusting)	0	0	0
Pre	Yes	RBCM	2016	Paraiso Puerto Aventuras	2017	3	23	No	Agariciidae	Agaricia tenuifolia	0.434783	0	0
Pre	Yes	RBCM	2016	Paraiso Puerto Aventuras	2017	3	23	Yes	Faviinae	Colpophyllia natans	0	0	0
Pre	Yes	RBCM	2016	Paraiso Puerto Aventuras	2017	3	23	Yes	Meandrinidae	Dendrogyra cylindrus	0	0	0
Pre	Yes	RBCM	2016	Paraiso Puerto Aventuras	2017	3	23	Yes	Meandrinidae	Dichocoenia stokesi	0	0	0
Pre	Yes	RBCM	2016	Paraiso Puerto Aventuras	2017	3	23	Yes	Faviinae	Diploria labyrinthiformis	0.434783	0	0
Pre	Yes	RBCM	2016	Paraiso Puerto Aventuras	2017	3	23	Yes	Meandrinidae	Eusmilia fastigiata	0.434783	0	0
Pre	Yes	RBCM	2016	Paraiso Puerto Aventuras	2017	3	23	No	Faviinae	Favia fragum	0	0	0
Pre	Yes	RBCM	2016	Paraiso Puerto Aventuras	2017	3	23	No	Agariciidae	Helioseris cucullata	0	0	0
Pre	Yes	RBCM	2016	Paraiso Puerto Aventuras	2017	3	23	Yes	Mussinae	Isophyllia spp.	0	0	0
Pre	Yes	RBCM	2016	Paraiso Puerto Aventuras	2017	3	23	Yes	Mussinae	Isophyllia spp.	0	0	0
Pre	Yes	RBCM	2016	Paraiso Puerto Aventuras	2017	3	23	Yes	Mussinae	Isophyllia spp.	0	0	0
Pre	Yes	RBCM	2016	Paraiso Puerto Aventuras	2017	3	23	No	Pocilloporidae	Madracis spp.	0	0	0
Pre	Yes	RBCM	2016	Paraiso Puerto Aventuras	2017	3	23	No	Pocilloporidae	Madracis spp.	0.869565	0	0
Pre	Yes	RBCM	2016	Paraiso Puerto Aventuras	2017	3	23	Yes	Meandrinidae	Meandrina spp.	0	0	0
Pre	Yes	RBCM	2016	Paraiso Puerto Aventuras	2017	3	23	Yes	Meandrinidae	Meandrina spp.	0.869565	0	0
Pre	Yes	RBCM	2016	Paraiso Puerto Aventuras	2017	3	23	Yes	Meandrinidae	Meandrina spp.	0	0	0
Pre	Yes	RBCM	2016	Paraiso Puerto Aventuras	2017	3	23	Yes	Montastraeidae	Montastraea cavernosa	1.30435	0	0
Pre	Yes	RBCM	2016	Paraiso Puerto Aventuras	2017	3	23	No	Mussinae	Mussa angulosa	0	0	0
Pre	Yes	RBCM	2016	Paraiso Puerto Aventuras	2017	3	23	Yes	Mussinae	Mycetophyllia spp.	0	0	0
Pre	Yes	RBCM	2016	Paraiso Puerto Aventuras	2017	3	23	Yes	Mussinae	Mycetophyllia spp.	0	0	0
Pre	Yes	RBCM	2016	Paraiso Puerto Aventuras	2017	3	23	Yes	Mussinae	Mycetophyllia spp.	0	0	0
Pre	Yes	RBCM	2016	Paraiso Puerto Aventuras	2017	3	23	Yes	Mussinae	Mycetophyllia spp.	0	0	0
Pre	Yes	RBCM	2016	Paraiso Puerto Aventuras	2017	3	23	Yes	Mussinae	Mycetophyllia spp.	1.30435	0	0
Pre	Yes	RBCM	2016	Paraiso Puerto Aventuras	2017	3	23	Yes	Merulinidae	Orbicella annularis	2.17391	0	0
Pre	Yes	RBCM	2016	Paraiso Puerto Aventuras	2017	3	23	Yes	Merulinidae	Orbicella faveolata	2.6087	0	0
Pre	Yes	RBCM	2016	Paraiso Puerto Aventuras	2017	3	23	Yes	Merulinidae	Orbicella franksi	13.4783	0	0
Pre	Yes	RBCM	2016	Paraiso Puerto Aventuras	2017	3	23	No	Poritidae	Porites astreoides	6.08696	0	0
Pre	Yes	RBCM	2016	Paraiso Puerto Aventuras	2017	3	23	No	Poritidae	Branching Porites	0	0	0
Pre	Yes	RBCM	2016	Paraiso Puerto Aventuras	2017	3	23	No	Poritidae	Branching Porites	0	0	0
Pre	Yes	RBCM	2016	Paraiso Puerto Aventuras	2017	3	23	No	Poritidae	Branching Porites	0.434783	0	0
Pre	Yes	RBCM	2016	Paraiso Puerto Aventuras	2017	3	23	No	Poritidae	Branching Porites	0	0	0
Pre	Yes	RBCM	2016	Paraiso Puerto Aventuras	2017	3	23	Yes	Faviinae	Pseudodiploria clivosa	0	0	0
Pre	Yes	RBCM	2016	Paraiso Puerto Aventuras	2017	3	23	Yes	Faviinae	Pseudodiploria strigosa	0	0	0
Pre	Yes	RBCM	2016	Paraiso Puerto Aventuras	2017	3	23	No	Mussinae	Scolymia spp.	0	0	0
Pre	Yes	RBCM	2016	Paraiso Puerto Aventuras	2017	3	23	No	Mussinae	Scolymia spp.	0	0	0
Pre	Yes	RBCM	2016	Paraiso Puerto Aventuras	2017	3	23	No	Siderastreidae	Siderastrea radians	0.434783	0	0
Pre	Yes	RBCM	2016	Paraiso Puerto Aventuras	2017	3	23	Yes	Siderastreidae	Siderastrea siderea	3.04348	0	0
Pre	Yes	RBCM	2016	Paraiso Puerto Aventuras	2017	3	23	No	Scleractinia incertae sedis	Solenastrea bournoni	0	0	0
Pre	Yes	RBCM	2016	Paraiso Puerto Aventuras	2017	3	23	No	Astrocoeniidae	Stephanocoenia intersepta	0	0	0
Pre	Yes	PNAC	1996	Paso del Cedral	2016/2017	6	41.5	No	Acroporidae	Acropora cervicornis	0	0	0
Pre	Yes	PNAC	1996	Paso del Cedral	2016/2017	6	41.5	No	Acroporidae	Acropora palmata	0	0	0
Pre	Yes	PNAC	1996	Paso del Cedral	2016/2017	6	41.5	No	Acroporidae	Acropora cervicornis	0	0	0
Pre	Yes	PNAC	1996	Paso del Cedral	2016/2017	6	41.5	No	Agariciidae	Agaricia (encrusting)	8.91566	0	0
Pre	Yes	PNAC	1996	Paso del Cedral	2016/2017	6	41.5	No	Agariciidae	Agaricia (encrusting)	0	0	0
Pre	Yes	PNAC	1996	Paso del Cedral	2016/2017	6	41.5	No	Agariciidae	Agaricia (encrusting)	0	0	0
Pre	Yes	PNAC	1996	Paso del Cedral	2016/2017	6	41.5	No	Agariciidae	Agaricia (encrusting)	1.20482	0	0
Pre	Yes	PNAC	1996	Paso del Cedral	2016/2017	6	41.5	No	Agariciidae	Agaricia (encrusting)	0.722892	0	0
Pre	Yes	PNAC	1996	Paso del Cedral	2016/2017	6	41.5	No	Agariciidae	Agaricia (encrusting)	0	0	0
Pre	Yes	PNAC	1996	Paso del Cedral	2016/2017	6	41.5	No	Agariciidae	Agaricia tenuifolia	1.92771	0	0
Pre	Yes	PNAC	1996	Paso del Cedral	2016/2017	6	41.5	Yes	Faviinae	Colpophyllia natans	0.240964	0	0
Pre	Yes	PNAC	1996	Paso del Cedral	2016/2017	6	41.5	Yes	Meandrinidae	Dendrogyra cylindrus	0	0	0
Pre	Yes	PNAC	1996	Paso del Cedral	2016/2017	6	41.5	Yes	Meandrinidae	Dichocoenia stokesi	0.481928	0	0
Pre	Yes	PNAC	1996	Paso del Cedral	2016/2017	6	41.5	Yes	Faviinae	Diploria labyrinthiformis	0	0	0
Pre	Yes	PNAC	1996	Paso del Cedral	2016/2017	6	41.5	Yes	Meandrinidae	Eusmilia fastigiata	0.481928	0	0
Pre	Yes	PNAC	1996	Paso del Cedral	2016/2017	6	41.5	No	Faviinae	Favia fragum	0	0	0
Pre	Yes	PNAC	1996	Paso del Cedral	2016/2017	6	41.5	No	Agariciidae	Helioseris cucullata	0.963855	0	0
Pre	Yes	PNAC	1996	Paso del Cedral	2016/2017	6	41.5	Yes	Mussinae	Isophyllia spp.	0.240964	0	0
Pre	Yes	PNAC	1996	Paso del Cedral	2016/2017	6	41.5	Yes	Mussinae	Isophyllia spp.	0	0	0
Pre	Yes	PNAC	1996	Paso del Cedral	2016/2017	6	41.5	Yes	Mussinae	Isophyllia spp.	0	0	0
Pre	Yes	PNAC	1996	Paso del Cedral	2016/2017	6	41.5	No	Pocilloporidae	Madracis spp.	0	0	0
Pre	Yes	PNAC	1996	Paso del Cedral	2016/2017	6	41.5	No	Pocilloporidae	Madracis spp.	0	0	0
Pre	Yes	PNAC	1996	Paso del Cedral	2016/2017	6	41.5	Yes	Meandrinidae	Meandrina spp.	0.240964	0	0
Pre	Yes	PNAC	1996	Paso del Cedral	2016/2017	6	41.5	Yes	Meandrinidae	Meandrina spp.	0.481928	0	0
Pre	Yes	PNAC	1996	Paso del Cedral	2016/2017	6	41.5	Yes	Meandrinidae	Meandrina spp.	0	0	0
Pre	Yes	PNAC	1996	Paso del Cedral	2016/2017	6	41.5	Yes	Montastraeidae	Montastraea cavernosa	0.963855	0	0
Pre	Yes	PNAC	1996	Paso del Cedral	2016/2017	6	41.5	No	Mussinae	Mussa angulosa	0	0	0
Pre	Yes	PNAC	1996	Paso del Cedral	2016/2017	6	41.5	Yes	Mussinae	Mycetophyllia spp.	0	0	0
Pre	Yes	PNAC	1996	Paso del Cedral	2016/2017	6	41.5	Yes	Mussinae	Mycetophyllia spp.	0	0	0
Pre	Yes	PNAC	1996	Paso del Cedral	2016/2017	6	41.5	Yes	Mussinae	Mycetophyllia spp.	0	0	0
Pre	Yes	PNAC	1996	Paso del Cedral	2016/2017	6	41.5	Yes	Mussinae	Mycetophyllia spp.	0	0	0
Pre	Yes	PNAC	1996	Paso del Cedral	2016/2017	6	41.5	Yes	Mussinae	Mycetophyllia spp.	0	0	0
Pre	Yes	PNAC	1996	Paso del Cedral	2016/2017	6	41.5	Yes	Merulinidae	Orbicella annularis	0	0	0
Pre	Yes	PNAC	1996	Paso del Cedral	2016/2017	6	41.5	Yes	Merulinidae	Orbicella faveolata	0.240964	0	0
Pre	Yes	PNAC	1996	Paso del Cedral	2016/2017	6	41.5	Yes	Merulinidae	Orbicella franksi	0	0	0
Pre	Yes	PNAC	1996	Paso del Cedral	2016/2017	6	41.5	No	Poritidae	Porites astreoides	5.06024	0	0
Pre	Yes	PNAC	1996	Paso del Cedral	2016/2017	6	41.5	No	Poritidae	Branching Porites	0	0	0
Pre	Yes	PNAC	1996	Paso del Cedral	2016/2017	6	41.5	No	Poritidae	Branching Porites	0	0	0
Pre	Yes	PNAC	1996	Paso del Cedral	2016/2017	6	41.5	No	Poritidae	Branching Porites	4.33735	0	0
Pre	Yes	PNAC	1996	Paso del Cedral	2016/2017	6	41.5	No	Poritidae	Branching Porites	0	0	0
Pre	Yes	PNAC	1996	Paso del Cedral	2016/2017	6	41.5	Yes	Faviinae	Pseudodiploria clivosa	0	0	0
Pre	Yes	PNAC	1996	Paso del Cedral	2016/2017	6	41.5	Yes	Faviinae	Pseudodiploria strigosa	0	0	0
Pre	Yes	PNAC	1996	Paso del Cedral	2016/2017	6	41.5	No	Mussinae	Scolymia spp.	0	0	0
Pre	Yes	PNAC	1996	Paso del Cedral	2016/2017	6	41.5	No	Mussinae	Scolymia spp.	0	0	0
Pre	Yes	PNAC	1996	Paso del Cedral	2016/2017	6	41.5	No	Siderastreidae	Siderastrea radians	0	0	0
Pre	Yes	PNAC	1996	Paso del Cedral	2016/2017	6	41.5	Yes	Siderastreidae	Siderastrea siderea	4.81928	0	0
Pre	Yes	PNAC	1996	Paso del Cedral	2016/2017	6	41.5	No	Scleractinia incertae sedis	Solenastrea bournoni	0	0	0
Pre	Yes	PNAC	1996	Paso del Cedral	2016/2017	6	41.5	No	Astrocoeniidae	Stephanocoenia intersepta	0.240964	0	0
Pre	Yes	RBCM	2016	Punta Maroma Norte	2016	2	30	No	Acroporidae	Acropora cervicornis	0	0	0
Pre	Yes	RBCM	2016	Punta Maroma Norte	2016	2	30	No	Acroporidae	Acropora palmata	0.333333	0	0
Pre	Yes	RBCM	2016	Punta Maroma Norte	2016	2	30	No	Acroporidae	Acropora cervicornis	0	0	0
Pre	Yes	RBCM	2016	Punta Maroma Norte	2016	2	30	No	Agariciidae	Agaricia (encrusting)	6.33333	0	0
Pre	Yes	RBCM	2016	Punta Maroma Norte	2016	2	30	No	Agariciidae	Agaricia (encrusting)	0	0	0
Pre	Yes	RBCM	2016	Punta Maroma Norte	2016	2	30	No	Agariciidae	Agaricia (encrusting)	0	0	0
Pre	Yes	RBCM	2016	Punta Maroma Norte	2016	2	30	No	Agariciidae	Agaricia (encrusting)	0	0	0
Pre	Yes	RBCM	2016	Punta Maroma Norte	2016	2	30	No	Agariciidae	Agaricia (encrusting)	0.333333	0	0
Pre	Yes	RBCM	2016	Punta Maroma Norte	2016	2	30	No	Agariciidae	Agaricia (encrusting)	0	0	0
Pre	Yes	RBCM	2016	Punta Maroma Norte	2016	2	30	No	Agariciidae	Agaricia tenuifolia	0	0	0
Pre	Yes	RBCM	2016	Punta Maroma Norte	2016	2	30	Yes	Faviinae	Colpophyllia natans	0	0	0
Pre	Yes	RBCM	2016	Punta Maroma Norte	2016	2	30	Yes	Meandrinidae	Dendrogyra cylindrus	0	0	0
Pre	Yes	RBCM	2016	Punta Maroma Norte	2016	2	30	Yes	Meandrinidae	Dichocoenia stokesi	0.666667	0	0
Pre	Yes	RBCM	2016	Punta Maroma Norte	2016	2	30	Yes	Faviinae	Diploria labyrinthiformis	0.666667	0	0
Pre	Yes	RBCM	2016	Punta Maroma Norte	2016	2	30	Yes	Meandrinidae	Eusmilia fastigiata	0.666667	0	0
Pre	Yes	RBCM	2016	Punta Maroma Norte	2016	2	30	No	Faviinae	Favia fragum	0	0	0
Pre	Yes	RBCM	2016	Punta Maroma Norte	2016	2	30	No	Agariciidae	Helioseris cucullata	1	0	0
Pre	Yes	RBCM	2016	Punta Maroma Norte	2016	2	30	Yes	Mussinae	Isophyllia spp.	0.333333	0	0
Pre	Yes	RBCM	2016	Punta Maroma Norte	2016	2	30	Yes	Mussinae	Isophyllia spp.	0	0	0
Pre	Yes	RBCM	2016	Punta Maroma Norte	2016	2	30	Yes	Mussinae	Isophyllia spp.	0	0	0
Pre	Yes	RBCM	2016	Punta Maroma Norte	2016	2	30	No	Pocilloporidae	Madracis spp.	0	0	0
Pre	Yes	RBCM	2016	Punta Maroma Norte	2016	2	30	No	Pocilloporidae	Madracis spp.	0	0	0
Pre	Yes	RBCM	2016	Punta Maroma Norte	2016	2	30	Yes	Meandrinidae	Meandrina spp.	0	0	0
Pre	Yes	RBCM	2016	Punta Maroma Norte	2016	2	30	Yes	Meandrinidae	Meandrina spp.	0	0	0
Pre	Yes	RBCM	2016	Punta Maroma Norte	2016	2	30	Yes	Meandrinidae	Meandrina spp.	0	0	0
Pre	Yes	RBCM	2016	Punta Maroma Norte	2016	2	30	Yes	Montastraeidae	Montastraea cavernosa	4	0	0
Pre	Yes	RBCM	2016	Punta Maroma Norte	2016	2	30	No	Mussinae	Mussa angulosa	0	0	0
Pre	Yes	RBCM	2016	Punta Maroma Norte	2016	2	30	Yes	Mussinae	Mycetophyllia spp.	0	0	0
Pre	Yes	RBCM	2016	Punta Maroma Norte	2016	2	30	Yes	Mussinae	Mycetophyllia spp.	0	0	0
Pre	Yes	RBCM	2016	Punta Maroma Norte	2016	2	30	Yes	Mussinae	Mycetophyllia spp.	0	0	0
Pre	Yes	RBCM	2016	Punta Maroma Norte	2016	2	30	Yes	Mussinae	Mycetophyllia spp.	0	0	0
Pre	Yes	RBCM	2016	Punta Maroma Norte	2016	2	30	Yes	Mussinae	Mycetophyllia spp.	1.33333	0	0
Pre	Yes	RBCM	2016	Punta Maroma Norte	2016	2	30	Yes	Merulinidae	Orbicella annularis	0.666667	0	0
Pre	Yes	RBCM	2016	Punta Maroma Norte	2016	2	30	Yes	Merulinidae	Orbicella faveolata	1.66667	0	0
Pre	Yes	RBCM	2016	Punta Maroma Norte	2016	2	30	Yes	Merulinidae	Orbicella franksi	0.333333	0	0
Pre	Yes	RBCM	2016	Punta Maroma Norte	2016	2	30	No	Poritidae	Porites astreoides	2	0	0
Pre	Yes	RBCM	2016	Punta Maroma Norte	2016	2	30	No	Poritidae	Branching Porites	0	0	0
Pre	Yes	RBCM	2016	Punta Maroma Norte	2016	2	30	No	Poritidae	Branching Porites	0	0	0
Pre	Yes	RBCM	2016	Punta Maroma Norte	2016	2	30	No	Poritidae	Branching Porites	0	0	0
Pre	Yes	RBCM	2016	Punta Maroma Norte	2016	2	30	No	Poritidae	Branching Porites	0	0	0
Pre	Yes	RBCM	2016	Punta Maroma Norte	2016	2	30	Yes	Faviinae	Pseudodiploria clivosa	0	0	0
Pre	Yes	RBCM	2016	Punta Maroma Norte	2016	2	30	Yes	Faviinae	Pseudodiploria strigosa	1.66667	0	0
Pre	Yes	RBCM	2016	Punta Maroma Norte	2016	2	30	No	Mussinae	Scolymia spp.	0	0	0
Pre	Yes	RBCM	2016	Punta Maroma Norte	2016	2	30	No	Mussinae	Scolymia spp.	0	0	0
Pre	Yes	RBCM	2016	Punta Maroma Norte	2016	2	30	No	Siderastreidae	Siderastrea radians	0.333333	0	0
Pre	Yes	RBCM	2016	Punta Maroma Norte	2016	2	30	Yes	Siderastreidae	Siderastrea siderea	4.33333	0	0
Pre	Yes	RBCM	2016	Punta Maroma Norte	2016	2	30	No	Scleractinia incertae sedis	Solenastrea bournoni	0	0	0
Pre	Yes	RBCM	2016	Punta Maroma Norte	2016	2	30	No	Astrocoeniidae	Stephanocoenia intersepta	1	0	0
Pre	Yes	RBCM	2016	Punta Maroma Sur	2016	2	20	No	Acroporidae	Acropora cervicornis	0	0	0
Pre	Yes	RBCM	2016	Punta Maroma Sur	2016	2	20	No	Acroporidae	Acropora palmata	0	0	0
Pre	Yes	RBCM	2016	Punta Maroma Sur	2016	2	20	No	Acroporidae	Acropora cervicornis	0	0	0
Pre	Yes	RBCM	2016	Punta Maroma Sur	2016	2	20	No	Agariciidae	Agaricia (encrusting)	6	0	0
Pre	Yes	RBCM	2016	Punta Maroma Sur	2016	2	20	No	Agariciidae	Agaricia (encrusting)	0	0	0
Pre	Yes	RBCM	2016	Punta Maroma Sur	2016	2	20	No	Agariciidae	Agaricia (encrusting)	0	0	0
Pre	Yes	RBCM	2016	Punta Maroma Sur	2016	2	20	No	Agariciidae	Agaricia (encrusting)	0	0	0
Pre	Yes	RBCM	2016	Punta Maroma Sur	2016	2	20	No	Agariciidae	Agaricia (encrusting)	0	0	0
Pre	Yes	RBCM	2016	Punta Maroma Sur	2016	2	20	No	Agariciidae	Agaricia (encrusting)	0	0	0
Pre	Yes	RBCM	2016	Punta Maroma Sur	2016	2	20	No	Agariciidae	Agaricia tenuifolia	3.5	0	0
Pre	Yes	RBCM	2016	Punta Maroma Sur	2016	2	20	Yes	Faviinae	Colpophyllia natans	0	0	0
Pre	Yes	RBCM	2016	Punta Maroma Sur	2016	2	20	Yes	Meandrinidae	Dendrogyra cylindrus	0.5	0	0
Pre	Yes	RBCM	2016	Punta Maroma Sur	2016	2	20	Yes	Meandrinidae	Dichocoenia stokesi	0.5	0	0
Pre	Yes	RBCM	2016	Punta Maroma Sur	2016	2	20	Yes	Faviinae	Diploria labyrinthiformis	1	0	0
Pre	Yes	RBCM	2016	Punta Maroma Sur	2016	2	20	Yes	Meandrinidae	Eusmilia fastigiata	0	0	0
Pre	Yes	RBCM	2016	Punta Maroma Sur	2016	2	20	No	Faviinae	Favia fragum	0	0	0
Pre	Yes	RBCM	2016	Punta Maroma Sur	2016	2	20	No	Agariciidae	Helioseris cucullata	0	0	0
Pre	Yes	RBCM	2016	Punta Maroma Sur	2016	2	20	Yes	Mussinae	Isophyllia spp.	0.5	0	0
Pre	Yes	RBCM	2016	Punta Maroma Sur	2016	2	20	Yes	Mussinae	Isophyllia spp.	0	0	0
Pre	Yes	RBCM	2016	Punta Maroma Sur	2016	2	20	Yes	Mussinae	Isophyllia spp.	0	0	0
Pre	Yes	RBCM	2016	Punta Maroma Sur	2016	2	20	No	Pocilloporidae	Madracis spp.	0	0	0
Pre	Yes	RBCM	2016	Punta Maroma Sur	2016	2	20	No	Pocilloporidae	Madracis spp.	0.5	0	0
Pre	Yes	RBCM	2016	Punta Maroma Sur	2016	2	20	Yes	Meandrinidae	Meandrina spp.	0	0	0
Pre	Yes	RBCM	2016	Punta Maroma Sur	2016	2	20	Yes	Meandrinidae	Meandrina spp.	0	0	0
Pre	Yes	RBCM	2016	Punta Maroma Sur	2016	2	20	Yes	Meandrinidae	Meandrina spp.	0	0	0
Pre	Yes	RBCM	2016	Punta Maroma Sur	2016	2	20	Yes	Montastraeidae	Montastraea cavernosa	3.5	0	0
Pre	Yes	RBCM	2016	Punta Maroma Sur	2016	2	20	No	Mussinae	Mussa angulosa	0	0	0
Pre	Yes	RBCM	2016	Punta Maroma Sur	2016	2	20	Yes	Mussinae	Mycetophyllia spp.	0	0	0
Pre	Yes	RBCM	2016	Punta Maroma Sur	2016	2	20	Yes	Mussinae	Mycetophyllia spp.	0	0	0
Pre	Yes	RBCM	2016	Punta Maroma Sur	2016	2	20	Yes	Mussinae	Mycetophyllia spp.	0	0	0
Pre	Yes	RBCM	2016	Punta Maroma Sur	2016	2	20	Yes	Mussinae	Mycetophyllia spp.	0	0	0
Pre	Yes	RBCM	2016	Punta Maroma Sur	2016	2	20	Yes	Mussinae	Mycetophyllia spp.	0	0	0
Pre	Yes	RBCM	2016	Punta Maroma Sur	2016	2	20	Yes	Merulinidae	Orbicella annularis	0	0	0
Pre	Yes	RBCM	2016	Punta Maroma Sur	2016	2	20	Yes	Merulinidae	Orbicella faveolata	0.5	0	0
Pre	Yes	RBCM	2016	Punta Maroma Sur	2016	2	20	Yes	Merulinidae	Orbicella franksi	0	0	0
Pre	Yes	RBCM	2016	Punta Maroma Sur	2016	2	20	No	Poritidae	Porites astreoides	7.5	0	0
Pre	Yes	RBCM	2016	Punta Maroma Sur	2016	2	20	No	Poritidae	Branching Porites	0	0	0
Pre	Yes	RBCM	2016	Punta Maroma Sur	2016	2	20	No	Poritidae	Branching Porites	0	0	0
Pre	Yes	RBCM	2016	Punta Maroma Sur	2016	2	20	No	Poritidae	Branching Porites	0.5	0	0
Pre	Yes	RBCM	2016	Punta Maroma Sur	2016	2	20	No	Poritidae	Branching Porites	0	0	0
Pre	Yes	RBCM	2016	Punta Maroma Sur	2016	2	20	Yes	Faviinae	Pseudodiploria clivosa	0	0	0
Pre	Yes	RBCM	2016	Punta Maroma Sur	2016	2	20	Yes	Faviinae	Pseudodiploria strigosa	2.5	0	0
Pre	Yes	RBCM	2016	Punta Maroma Sur	2016	2	20	No	Mussinae	Scolymia spp.	0	0	0
Pre	Yes	RBCM	2016	Punta Maroma Sur	2016	2	20	No	Mussinae	Scolymia spp.	0	0	0
Pre	Yes	RBCM	2016	Punta Maroma Sur	2016	2	20	No	Siderastreidae	Siderastrea radians	0.5	0	0
Pre	Yes	RBCM	2016	Punta Maroma Sur	2016	2	20	Yes	Siderastreidae	Siderastrea siderea	7.5	0	0
Pre	Yes	RBCM	2016	Punta Maroma Sur	2016	2	20	No	Scleractinia incertae sedis	Solenastrea bournoni	0	0	0
Pre	Yes	RBCM	2016	Punta Maroma Sur	2016	2	20	No	Astrocoeniidae	Stephanocoenia intersepta	1	0	0
Pre	Yes	PNAPM	1998	Tanchacte	2016	2	28	No	Acroporidae	Acropora cervicornis	0.357143	0	0
Pre	Yes	PNAPM	1998	Tanchacte	2016	2	28	No	Acroporidae	Acropora palmata	2.85714	0	0
Pre	Yes	PNAPM	1998	Tanchacte	2016	2	28	No	Acroporidae	Acropora cervicornis	0	0	0
Pre	Yes	PNAPM	1998	Tanchacte	2016	2	28	No	Agariciidae	Agaricia (encrusting)	0.357143	0	0
Pre	Yes	PNAPM	1998	Tanchacte	2016	2	28	No	Agariciidae	Agaricia (encrusting)	0	0	0
Pre	Yes	PNAPM	1998	Tanchacte	2016	2	28	No	Agariciidae	Agaricia (encrusting)	0	0	0
Pre	Yes	PNAPM	1998	Tanchacte	2016	2	28	No	Agariciidae	Agaricia (encrusting)	0	0	0
Pre	Yes	PNAPM	1998	Tanchacte	2016	2	28	No	Agariciidae	Agaricia (encrusting)	0	0	0
Pre	Yes	PNAPM	1998	Tanchacte	2016	2	28	No	Agariciidae	Agaricia (encrusting)	1.42857	0	0
Pre	Yes	PNAPM	1998	Tanchacte	2016	2	28	No	Agariciidae	Agaricia tenuifolia	2.14286	0	0
Pre	Yes	PNAPM	1998	Tanchacte	2016	2	28	Yes	Faviinae	Colpophyllia natans	0.714286	0	0
Pre	Yes	PNAPM	1998	Tanchacte	2016	2	28	Yes	Meandrinidae	Dendrogyra cylindrus	0	0	0
Pre	Yes	PNAPM	1998	Tanchacte	2016	2	28	Yes	Meandrinidae	Dichocoenia stokesi	0	0	0
Pre	Yes	PNAPM	1998	Tanchacte	2016	2	28	Yes	Faviinae	Diploria labyrinthiformis	0	0	0
Pre	Yes	PNAPM	1998	Tanchacte	2016	2	28	Yes	Meandrinidae	Eusmilia fastigiata	0	0	0
Pre	Yes	PNAPM	1998	Tanchacte	2016	2	28	No	Faviinae	Favia fragum	0	0	0
Pre	Yes	PNAPM	1998	Tanchacte	2016	2	28	No	Agariciidae	Helioseris cucullata	0	0	0
Pre	Yes	PNAPM	1998	Tanchacte	2016	2	28	Yes	Mussinae	Isophyllia spp.	0	0	0
Pre	Yes	PNAPM	1998	Tanchacte	2016	2	28	Yes	Mussinae	Isophyllia spp.	0	0	0
Pre	Yes	PNAPM	1998	Tanchacte	2016	2	28	Yes	Mussinae	Isophyllia spp.	0	0	0
Pre	Yes	PNAPM	1998	Tanchacte	2016	2	28	No	Pocilloporidae	Madracis spp.	0	0	0
Pre	Yes	PNAPM	1998	Tanchacte	2016	2	28	No	Pocilloporidae	Madracis spp.	0	0	0
Pre	Yes	PNAPM	1998	Tanchacte	2016	2	28	Yes	Meandrinidae	Meandrina spp.	0	0	0
Pre	Yes	PNAPM	1998	Tanchacte	2016	2	28	Yes	Meandrinidae	Meandrina spp.	0	0	0
Pre	Yes	PNAPM	1998	Tanchacte	2016	2	28	Yes	Meandrinidae	Meandrina spp.	0	0	0
Pre	Yes	PNAPM	1998	Tanchacte	2016	2	28	Yes	Montastraeidae	Montastraea cavernosa	0.714286	0	0
Pre	Yes	PNAPM	1998	Tanchacte	2016	2	28	No	Mussinae	Mussa angulosa	0	0	0
Pre	Yes	PNAPM	1998	Tanchacte	2016	2	28	Yes	Mussinae	Mycetophyllia spp.	0	0	0
Pre	Yes	PNAPM	1998	Tanchacte	2016	2	28	Yes	Mussinae	Mycetophyllia spp.	0	0	0
Pre	Yes	PNAPM	1998	Tanchacte	2016	2	28	Yes	Mussinae	Mycetophyllia spp.	0	0	0
Pre	Yes	PNAPM	1998	Tanchacte	2016	2	28	Yes	Mussinae	Mycetophyllia spp.	0	0	0
Pre	Yes	PNAPM	1998	Tanchacte	2016	2	28	Yes	Mussinae	Mycetophyllia spp.	0	0	0
Pre	Yes	PNAPM	1998	Tanchacte	2016	2	28	Yes	Merulinidae	Orbicella annularis	0	0	0
Pre	Yes	PNAPM	1998	Tanchacte	2016	2	28	Yes	Merulinidae	Orbicella faveolata	1.07143	0	0
Pre	Yes	PNAPM	1998	Tanchacte	2016	2	28	Yes	Merulinidae	Orbicella franksi	0	0	0
Pre	Yes	PNAPM	1998	Tanchacte	2016	2	28	No	Poritidae	Porites astreoides	3.57143	0	0
Pre	Yes	PNAPM	1998	Tanchacte	2016	2	28	No	Poritidae	Branching Porites	0	0	0
Pre	Yes	PNAPM	1998	Tanchacte	2016	2	28	No	Poritidae	Branching Porites	0	0	0
Pre	Yes	PNAPM	1998	Tanchacte	2016	2	28	No	Poritidae	Branching Porites	0.357143	0	0
Pre	Yes	PNAPM	1998	Tanchacte	2016	2	28	No	Poritidae	Branching Porites	0	0	0
Pre	Yes	PNAPM	1998	Tanchacte	2016	2	28	Yes	Faviinae	Pseudodiploria clivosa	0	0	0
Pre	Yes	PNAPM	1998	Tanchacte	2016	2	28	Yes	Faviinae	Pseudodiploria strigosa	6.07143	0	0
Pre	Yes	PNAPM	1998	Tanchacte	2016	2	28	No	Mussinae	Scolymia spp.	0	0	0
Pre	Yes	PNAPM	1998	Tanchacte	2016	2	28	No	Mussinae	Scolymia spp.	0	0	0
Pre	Yes	PNAPM	1998	Tanchacte	2016	2	28	No	Siderastreidae	Siderastrea radians	0	0	0
Pre	Yes	PNAPM	1998	Tanchacte	2016	2	28	Yes	Siderastreidae	Siderastrea siderea	5	0	0
Pre	Yes	PNAPM	1998	Tanchacte	2016	2	28	No	Scleractinia incertae sedis	Solenastrea bournoni	0	0	0
Pre	Yes	PNAPM	1998	Tanchacte	2016	2	28	No	Astrocoeniidae	Stephanocoenia intersepta	0.357143	0	0
Pre	Yes	PNAPM	1998	TANCHACTE SUR	2016	4	50	No	Acroporidae	Acropora cervicornis	0	0	0
Pre	Yes	PNAPM	1998	TANCHACTE SUR	2016	4	50	No	Acroporidae	Acropora palmata	0	0	0
Pre	Yes	PNAPM	1998	TANCHACTE SUR	2016	4	50	No	Acroporidae	Acropora cervicornis	0	0	0
Pre	Yes	PNAPM	1998	TANCHACTE SUR	2016	4	50	No	Agariciidae	Agaricia (encrusting)	1	0	0
Pre	Yes	PNAPM	1998	TANCHACTE SUR	2016	4	50	No	Agariciidae	Agaricia (encrusting)	0	0	0
Pre	Yes	PNAPM	1998	TANCHACTE SUR	2016	4	50	No	Agariciidae	Agaricia (encrusting)	0	0	0
Pre	Yes	PNAPM	1998	TANCHACTE SUR	2016	4	50	No	Agariciidae	Agaricia (encrusting)	0	0	0
Pre	Yes	PNAPM	1998	TANCHACTE SUR	2016	4	50	No	Agariciidae	Agaricia (encrusting)	0	0	0
Pre	Yes	PNAPM	1998	TANCHACTE SUR	2016	4	50	No	Agariciidae	Agaricia (encrusting)	0	0	0
Pre	Yes	PNAPM	1998	TANCHACTE SUR	2016	4	50	No	Agariciidae	Agaricia tenuifolia	1.2	0	0
Pre	Yes	PNAPM	1998	TANCHACTE SUR	2016	4	50	Yes	Faviinae	Colpophyllia natans	0	0	0
Pre	Yes	PNAPM	1998	TANCHACTE SUR	2016	4	50	Yes	Meandrinidae	Dendrogyra cylindrus	0	0	0
Pre	Yes	PNAPM	1998	TANCHACTE SUR	2016	4	50	Yes	Meandrinidae	Dichocoenia stokesi	0.4	0	0
Pre	Yes	PNAPM	1998	TANCHACTE SUR	2016	4	50	Yes	Faviinae	Diploria labyrinthiformis	0	0	0
Pre	Yes	PNAPM	1998	TANCHACTE SUR	2016	4	50	Yes	Meandrinidae	Eusmilia fastigiata	0	0	0
Pre	Yes	PNAPM	1998	TANCHACTE SUR	2016	4	50	No	Faviinae	Favia fragum	0	0	0
Pre	Yes	PNAPM	1998	TANCHACTE SUR	2016	4	50	No	Agariciidae	Helioseris cucullata	0	0	0
Pre	Yes	PNAPM	1998	TANCHACTE SUR	2016	4	50	Yes	Mussinae	Isophyllia spp.	0	0	0
Pre	Yes	PNAPM	1998	TANCHACTE SUR	2016	4	50	Yes	Mussinae	Isophyllia spp.	0	0	0
Pre	Yes	PNAPM	1998	TANCHACTE SUR	2016	4	50	Yes	Mussinae	Isophyllia spp.	0	0	0
Pre	Yes	PNAPM	1998	TANCHACTE SUR	2016	4	50	No	Pocilloporidae	Madracis spp.	0	0	0
Pre	Yes	PNAPM	1998	TANCHACTE SUR	2016	4	50	No	Pocilloporidae	Madracis spp.	0	0	0
Pre	Yes	PNAPM	1998	TANCHACTE SUR	2016	4	50	Yes	Meandrinidae	Meandrina spp.	0	0	0
Pre	Yes	PNAPM	1998	TANCHACTE SUR	2016	4	50	Yes	Meandrinidae	Meandrina spp.	0	0	0
Pre	Yes	PNAPM	1998	TANCHACTE SUR	2016	4	50	Yes	Meandrinidae	Meandrina spp.	0	0	0
Pre	Yes	PNAPM	1998	TANCHACTE SUR	2016	4	50	Yes	Montastraeidae	Montastraea cavernosa	0.2	0	0
Pre	Yes	PNAPM	1998	TANCHACTE SUR	2016	4	50	No	Mussinae	Mussa angulosa	0	0	0
Pre	Yes	PNAPM	1998	TANCHACTE SUR	2016	4	50	Yes	Mussinae	Mycetophyllia spp.	0	0	0
Pre	Yes	PNAPM	1998	TANCHACTE SUR	2016	4	50	Yes	Mussinae	Mycetophyllia spp.	0	0	0
Pre	Yes	PNAPM	1998	TANCHACTE SUR	2016	4	50	Yes	Mussinae	Mycetophyllia spp.	0	0	0
Pre	Yes	PNAPM	1998	TANCHACTE SUR	2016	4	50	Yes	Mussinae	Mycetophyllia spp.	0	0	0
Pre	Yes	PNAPM	1998	TANCHACTE SUR	2016	4	50	Yes	Mussinae	Mycetophyllia spp.	0	0	0
Pre	Yes	PNAPM	1998	TANCHACTE SUR	2016	4	50	Yes	Merulinidae	Orbicella annularis	1	0	0
Pre	Yes	PNAPM	1998	TANCHACTE SUR	2016	4	50	Yes	Merulinidae	Orbicella faveolata	3.6	0	0
Pre	Yes	PNAPM	1998	TANCHACTE SUR	2016	4	50	Yes	Merulinidae	Orbicella franksi	0	0	0
Pre	Yes	PNAPM	1998	TANCHACTE SUR	2016	4	50	No	Poritidae	Porites astreoides	9.8	0	0
Pre	Yes	PNAPM	1998	TANCHACTE SUR	2016	4	50	No	Poritidae	Branching Porites	0	0	0
Pre	Yes	PNAPM	1998	TANCHACTE SUR	2016	4	50	No	Poritidae	Branching Porites	0	0	0
Pre	Yes	PNAPM	1998	TANCHACTE SUR	2016	4	50	No	Poritidae	Branching Porites	0.2	0	0
Pre	Yes	PNAPM	1998	TANCHACTE SUR	2016	4	50	No	Poritidae	Branching Porites	0	0	0
Pre	Yes	PNAPM	1998	TANCHACTE SUR	2016	4	50	Yes	Faviinae	Pseudodiploria clivosa	0	0	0
Pre	Yes	PNAPM	1998	TANCHACTE SUR	2016	4	50	Yes	Faviinae	Pseudodiploria strigosa	0.2	0	0
Pre	Yes	PNAPM	1998	TANCHACTE SUR	2016	4	50	No	Mussinae	Scolymia spp.	0	0	0
Pre	Yes	PNAPM	1998	TANCHACTE SUR	2016	4	50	No	Mussinae	Scolymia spp.	0	0	0
Pre	Yes	PNAPM	1998	TANCHACTE SUR	2016	4	50	No	Siderastreidae	Siderastrea radians	0	0	0
Pre	Yes	PNAPM	1998	TANCHACTE SUR	2016	4	50	Yes	Siderastreidae	Siderastrea siderea	0.8	0	0
Pre	Yes	PNAPM	1998	TANCHACTE SUR	2016	4	50	No	Scleractinia incertae sedis	Solenastrea bournoni	0	0	0
Pre	Yes	PNAPM	1998	TANCHACTE SUR	2016	4	50	No	Astrocoeniidae	Stephanocoenia intersepta	0	0	0
Pre	Yes	PNAC	1996	Yucab	2016/2017	5	38	No	Acroporidae	Acropora cervicornis	0	0	0
Pre	Yes	PNAC	1996	Yucab	2016/2017	5	38	No	Acroporidae	Acropora palmata	0	0	0
Pre	Yes	PNAC	1996	Yucab	2016/2017	5	38	No	Acroporidae	Acropora cervicornis	0	0	0
Pre	Yes	PNAC	1996	Yucab	2016/2017	5	38	No	Agariciidae	Agaricia (encrusting)	6.05263	0	0
Pre	Yes	PNAC	1996	Yucab	2016/2017	5	38	No	Agariciidae	Agaricia (encrusting)	0	0	0
Pre	Yes	PNAC	1996	Yucab	2016/2017	5	38	No	Agariciidae	Agaricia (encrusting)	0	0	0
Pre	Yes	PNAC	1996	Yucab	2016/2017	5	38	No	Agariciidae	Agaricia (encrusting)	0.789474	0	0
Pre	Yes	PNAC	1996	Yucab	2016/2017	5	38	No	Agariciidae	Agaricia (encrusting)	0.526316	0	0
Pre	Yes	PNAC	1996	Yucab	2016/2017	5	38	No	Agariciidae	Agaricia (encrusting)	0.263158	0	0
Pre	Yes	PNAC	1996	Yucab	2016/2017	5	38	No	Agariciidae	Agaricia tenuifolia	0	0	0
Pre	Yes	PNAC	1996	Yucab	2016/2017	5	38	Yes	Faviinae	Colpophyllia natans	0	0	0
Pre	Yes	PNAC	1996	Yucab	2016/2017	5	38	Yes	Meandrinidae	Dendrogyra cylindrus	0	0	0
Pre	Yes	PNAC	1996	Yucab	2016/2017	5	38	Yes	Meandrinidae	Dichocoenia stokesi	0	0	0
Pre	Yes	PNAC	1996	Yucab	2016/2017	5	38	Yes	Faviinae	Diploria labyrinthiformis	0	0	0
Pre	Yes	PNAC	1996	Yucab	2016/2017	5	38	Yes	Meandrinidae	Eusmilia fastigiata	2.10526	0	0
Pre	Yes	PNAC	1996	Yucab	2016/2017	5	38	No	Faviinae	Favia fragum	0	0	0
Pre	Yes	PNAC	1996	Yucab	2016/2017	5	38	No	Agariciidae	Helioseris cucullata	0.263158	0	0
Pre	Yes	PNAC	1996	Yucab	2016/2017	5	38	Yes	Mussinae	Isophyllia spp.	0.263158	0	0
Pre	Yes	PNAC	1996	Yucab	2016/2017	5	38	Yes	Mussinae	Isophyllia spp.	0	0	0
Pre	Yes	PNAC	1996	Yucab	2016/2017	5	38	Yes	Mussinae	Isophyllia spp.	0	0	0
Pre	Yes	PNAC	1996	Yucab	2016/2017	5	38	No	Pocilloporidae	Madracis spp.	0.526316	0	0
Pre	Yes	PNAC	1996	Yucab	2016/2017	5	38	No	Pocilloporidae	Madracis spp.	1.31579	0	0
Pre	Yes	PNAC	1996	Yucab	2016/2017	5	38	Yes	Meandrinidae	Meandrina spp.	0	0	0
Pre	Yes	PNAC	1996	Yucab	2016/2017	5	38	Yes	Meandrinidae	Meandrina spp.	0	0	0
Pre	Yes	PNAC	1996	Yucab	2016/2017	5	38	Yes	Meandrinidae	Meandrina spp.	0.263158	0	0
Pre	Yes	PNAC	1996	Yucab	2016/2017	5	38	Yes	Montastraeidae	Montastraea cavernosa	1.84211	0	0
Pre	Yes	PNAC	1996	Yucab	2016/2017	5	38	No	Mussinae	Mussa angulosa	0	0	0
Pre	Yes	PNAC	1996	Yucab	2016/2017	5	38	Yes	Mussinae	Mycetophyllia spp.	0	0	0
Pre	Yes	PNAC	1996	Yucab	2016/2017	5	38	Yes	Mussinae	Mycetophyllia spp.	0	0	0
Pre	Yes	PNAC	1996	Yucab	2016/2017	5	38	Yes	Mussinae	Mycetophyllia spp.	0	0	0
Pre	Yes	PNAC	1996	Yucab	2016/2017	5	38	Yes	Mussinae	Mycetophyllia spp.	0	0	0
Pre	Yes	PNAC	1996	Yucab	2016/2017	5	38	Yes	Mussinae	Mycetophyllia spp.	0	0	0
Pre	Yes	PNAC	1996	Yucab	2016/2017	5	38	Yes	Merulinidae	Orbicella annularis	0	0	0
Pre	Yes	PNAC	1996	Yucab	2016/2017	5	38	Yes	Merulinidae	Orbicella faveolata	0.263158	0	0
Pre	Yes	PNAC	1996	Yucab	2016/2017	5	38	Yes	Merulinidae	Orbicella franksi	0	0	0
Pre	Yes	PNAC	1996	Yucab	2016/2017	5	38	No	Poritidae	Porites astreoides	8.15789	0	0
Pre	Yes	PNAC	1996	Yucab	2016/2017	5	38	No	Poritidae	Branching Porites	0	0	0
Pre	Yes	PNAC	1996	Yucab	2016/2017	5	38	No	Poritidae	Branching Porites	0	0	0
Pre	Yes	PNAC	1996	Yucab	2016/2017	5	38	No	Poritidae	Branching Porites	6.57895	0	0
Pre	Yes	PNAC	1996	Yucab	2016/2017	5	38	No	Poritidae	Branching Porites	0	0	0
Pre	Yes	PNAC	1996	Yucab	2016/2017	5	38	Yes	Faviinae	Pseudodiploria clivosa	0	0	0
Pre	Yes	PNAC	1996	Yucab	2016/2017	5	38	Yes	Faviinae	Pseudodiploria strigosa	0.263158	0	0
Pre	Yes	PNAC	1996	Yucab	2016/2017	5	38	No	Mussinae	Scolymia spp.	0	0	0
Pre	Yes	PNAC	1996	Yucab	2016/2017	5	38	No	Mussinae	Scolymia spp.	0	0	0
Pre	Yes	PNAC	1996	Yucab	2016/2017	5	38	No	Siderastreidae	Siderastrea radians	0	0	0
Pre	Yes	PNAC	1996	Yucab	2016/2017	5	38	Yes	Siderastreidae	Siderastrea siderea	8.15789	0	0
Pre	Yes	PNAC	1996	Yucab	2016/2017	5	38	No	Scleractinia incertae sedis	Solenastrea bournoni	0	0	0
Pre	Yes	PNAC	1996	Yucab	2016/2017	5	38	No	Astrocoeniidae	Stephanocoenia intersepta	0.526316	0	0
Post	Yes	RBCM	2016	Akumal Langosta	2019	8	80	No	Acroporidae	Acropora cervicornis	0.125	0	0
Post	Yes	RBCM	2016	Akumal Langosta	2019	8	80	No	Acroporidae	Acropora palmata	0.125	0	0
Post	Yes	RBCM	2016	Akumal Langosta	2019	8	80	No	Acroporidae	Acropora cervicornis	0	0	0
Post	Yes	RBCM	2016	Akumal Langosta	2019	8	80	No	Agariciidae	Agaricia (encrusting)	9.875	1.625	0.25
Post	Yes	RBCM	2016	Akumal Langosta	2019	8	80	No	Agariciidae	Agaricia (encrusting)	0	0	0
Post	Yes	RBCM	2016	Akumal Langosta	2019	8	80	No	Agariciidae	Agaricia (encrusting)	0	0	0
Post	Yes	RBCM	2016	Akumal Langosta	2019	8	80	No	Agariciidae	Agaricia (encrusting)	0.25	0	0
Post	Yes	RBCM	2016	Akumal Langosta	2019	8	80	No	Agariciidae	Agaricia (encrusting)	0	0.125	0
Post	Yes	RBCM	2016	Akumal Langosta	2019	8	80	No	Agariciidae	Agaricia (encrusting)	0	0	0
Post	Yes	RBCM	2016	Akumal Langosta	2019	8	80	No	Agariciidae	Agaricia tenuifolia	2.375	0.375	0.375
Post	Yes	RBCM	2016	Akumal Langosta	2019	8	80	Yes	Faviinae	Colpophyllia natans	0	0	0
Post	Yes	RBCM	2016	Akumal Langosta	2019	8	80	Yes	Meandrinidae	Dendrogyra cylindrus	0	0	0
Post	Yes	RBCM	2016	Akumal Langosta	2019	8	80	Yes	Meandrinidae	Dichocoenia stokesi	0.5	0.125	0
Post	Yes	RBCM	2016	Akumal Langosta	2019	8	80	Yes	Faviinae	Diploria labyrinthiformis	0.5	0	0
Post	Yes	RBCM	2016	Akumal Langosta	2019	8	80	Yes	Meandrinidae	Eusmilia fastigiata	0	0	0
Post	Yes	RBCM	2016	Akumal Langosta	2019	8	80	No	Faviinae	Favia fragum	0	0	0
Post	Yes	RBCM	2016	Akumal Langosta	2019	8	80	No	Agariciidae	Helioseris cucullata	0.25	0	0
Post	Yes	RBCM	2016	Akumal Langosta	2019	8	80	Yes	Mussinae	Isophyllia spp.	0.25	0	0
Post	Yes	RBCM	2016	Akumal Langosta	2019	8	80	Yes	Mussinae	Isophyllia spp.	0	0	0
Post	Yes	RBCM	2016	Akumal Langosta	2019	8	80	Yes	Mussinae	Isophyllia spp.	0	0	0
Post	Yes	RBCM	2016	Akumal Langosta	2019	8	80	No	Pocilloporidae	Madracis spp.	0	0	0
Post	Yes	RBCM	2016	Akumal Langosta	2019	8	80	No	Pocilloporidae	Madracis spp.	0	0	0
Post	Yes	RBCM	2016	Akumal Langosta	2019	8	80	Yes	Meandrinidae	Meandrina spp.	0	0	0
Post	Yes	RBCM	2016	Akumal Langosta	2019	8	80	Yes	Meandrinidae	Meandrina spp.	0	0	0.125
Post	Yes	RBCM	2016	Akumal Langosta	2019	8	80	Yes	Meandrinidae	Meandrina spp.	0	0	0
Post	Yes	RBCM	2016	Akumal Langosta	2019	8	80	Yes	Montastraeidae	Montastraea cavernosa	0.5	0	0.25
Post	Yes	RBCM	2016	Akumal Langosta	2019	8	80	No	Mussinae	Mussa angulosa	0	0	0
Post	Yes	RBCM	2016	Akumal Langosta	2019	8	80	Yes	Mussinae	Mycetophyllia spp.	0	0	0
Post	Yes	RBCM	2016	Akumal Langosta	2019	8	80	Yes	Mussinae	Mycetophyllia spp.	0	0	0
Post	Yes	RBCM	2016	Akumal Langosta	2019	8	80	Yes	Mussinae	Mycetophyllia spp.	0	0	0
Post	Yes	RBCM	2016	Akumal Langosta	2019	8	80	Yes	Mussinae	Mycetophyllia spp.	0	0	0
Post	Yes	RBCM	2016	Akumal Langosta	2019	8	80	Yes	Mussinae	Mycetophyllia spp.	0.125	0	0
Post	Yes	RBCM	2016	Akumal Langosta	2019	8	80	Yes	Merulinidae	Orbicella annularis	0.25	0.125	0
Post	Yes	RBCM	2016	Akumal Langosta	2019	8	80	Yes	Merulinidae	Orbicella faveolata	2.5	0.75	0
Post	Yes	RBCM	2016	Akumal Langosta	2019	8	80	Yes	Merulinidae	Orbicella franksi	0.125	0	0
Post	Yes	RBCM	2016	Akumal Langosta	2019	8	80	No	Poritidae	Porites astreoides	6	0.125	0
Post	Yes	RBCM	2016	Akumal Langosta	2019	8	80	No	Poritidae	Branching Porites	0	0	0
Post	Yes	RBCM	2016	Akumal Langosta	2019	8	80	No	Poritidae	Branching Porites	0	0	0
Post	Yes	RBCM	2016	Akumal Langosta	2019	8	80	No	Poritidae	Branching Porites	1.5	0.125	0
Post	Yes	RBCM	2016	Akumal Langosta	2019	8	80	No	Poritidae	Branching Porites	0	0	0
Post	Yes	RBCM	2016	Akumal Langosta	2019	8	80	Yes	Faviinae	Pseudodiploria clivosa	0	0	0
Post	Yes	RBCM	2016	Akumal Langosta	2019	8	80	Yes	Faviinae	Pseudodiploria strigosa	0.25	0	0.375
Post	Yes	RBCM	2016	Akumal Langosta	2019	8	80	No	Mussinae	Scolymia spp.	0	0	0
Post	Yes	RBCM	2016	Akumal Langosta	2019	8	80	No	Mussinae	Scolymia spp.	0	0	0
Post	Yes	RBCM	2016	Akumal Langosta	2019	8	80	No	Siderastreidae	Siderastrea radians	0.25	0	0
Post	Yes	RBCM	2016	Akumal Langosta	2019	8	80	Yes	Siderastreidae	Siderastrea siderea	2	0.5	0.625
Post	Yes	RBCM	2016	Akumal Langosta	2019	8	80	No	Scleractinia incertae sedis	Solenastrea bournoni	0	0	0
Post	Yes	RBCM	2016	Akumal Langosta	2019	8	80	No	Astrocoeniidae	Stephanocoenia intersepta	1.625	0	0
Post	Yes	PNAX	2000	Bacalar Chico	2019	8	76	No	Acroporidae	Acropora cervicornis	0	0	0
Post	Yes	PNAX	2000	Bacalar Chico	2019	8	76	No	Acroporidae	Acropora palmata	0.131579	0	0
Post	Yes	PNAX	2000	Bacalar Chico	2019	8	76	No	Acroporidae	Acropora cervicornis	0	0	0
Post	Yes	PNAX	2000	Bacalar Chico	2019	8	76	No	Agariciidae	Agaricia (encrusting)	29.6053	2.23684	0.657895
Post	Yes	PNAX	2000	Bacalar Chico	2019	8	76	No	Agariciidae	Agaricia (encrusting)	0	0	0
Post	Yes	PNAX	2000	Bacalar Chico	2019	8	76	No	Agariciidae	Agaricia (encrusting)	0	0	0
Post	Yes	PNAX	2000	Bacalar Chico	2019	8	76	No	Agariciidae	Agaricia (encrusting)	0.131579	0.131579	0
Post	Yes	PNAX	2000	Bacalar Chico	2019	8	76	No	Agariciidae	Agaricia (encrusting)	0.263158	0	0
Post	Yes	PNAX	2000	Bacalar Chico	2019	8	76	No	Agariciidae	Agaricia (encrusting)	0	0	0
Post	Yes	PNAX	2000	Bacalar Chico	2019	8	76	No	Agariciidae	Agaricia tenuifolia	1.57895	0	0
Post	Yes	PNAX	2000	Bacalar Chico	2019	8	76	Yes	Faviinae	Colpophyllia natans	0.131579	0	0
Post	Yes	PNAX	2000	Bacalar Chico	2019	8	76	Yes	Meandrinidae	Dendrogyra cylindrus	0	0	0
Post	Yes	PNAX	2000	Bacalar Chico	2019	8	76	Yes	Meandrinidae	Dichocoenia stokesi	0.131579	0	0
Post	Yes	PNAX	2000	Bacalar Chico	2019	8	76	Yes	Faviinae	Diploria labyrinthiformis	0.394737	0.526316	0.131579
Post	Yes	PNAX	2000	Bacalar Chico	2019	8	76	Yes	Meandrinidae	Eusmilia fastigiata	0	0	0
Post	Yes	PNAX	2000	Bacalar Chico	2019	8	76	No	Faviinae	Favia fragum	0	0	0
Post	Yes	PNAX	2000	Bacalar Chico	2019	8	76	No	Agariciidae	Helioseris cucullata	0.131579	0	0
Post	Yes	PNAX	2000	Bacalar Chico	2019	8	76	Yes	Mussinae	Isophyllia spp.	0.394737	0	0
Post	Yes	PNAX	2000	Bacalar Chico	2019	8	76	Yes	Mussinae	Isophyllia spp.	0	0	0
Post	Yes	PNAX	2000	Bacalar Chico	2019	8	76	Yes	Mussinae	Isophyllia spp.	0	0	0
Post	Yes	PNAX	2000	Bacalar Chico	2019	8	76	No	Pocilloporidae	Madracis spp.	0	0	0
Post	Yes	PNAX	2000	Bacalar Chico	2019	8	76	No	Pocilloporidae	Madracis spp.	0.131579	0	0
Post	Yes	PNAX	2000	Bacalar Chico	2019	8	76	Yes	Meandrinidae	Meandrina spp.	0	0	0
Post	Yes	PNAX	2000	Bacalar Chico	2019	8	76	Yes	Meandrinidae	Meandrina spp.	0.131579	0	0
Post	Yes	PNAX	2000	Bacalar Chico	2019	8	76	Yes	Meandrinidae	Meandrina spp.	0	0	0
Post	Yes	PNAX	2000	Bacalar Chico	2019	8	76	Yes	Montastraeidae	Montastraea cavernosa	2.5	0.657895	0.394737
Post	Yes	PNAX	2000	Bacalar Chico	2019	8	76	No	Mussinae	Mussa angulosa	0	0	0
Post	Yes	PNAX	2000	Bacalar Chico	2019	8	76	Yes	Mussinae	Mycetophyllia spp.	0	0	0
Post	Yes	PNAX	2000	Bacalar Chico	2019	8	76	Yes	Mussinae	Mycetophyllia spp.	0	0	0
Post	Yes	PNAX	2000	Bacalar Chico	2019	8	76	Yes	Mussinae	Mycetophyllia spp.	0	0	0
Post	Yes	PNAX	2000	Bacalar Chico	2019	8	76	Yes	Mussinae	Mycetophyllia spp.	0	0	0
Post	Yes	PNAX	2000	Bacalar Chico	2019	8	76	Yes	Mussinae	Mycetophyllia spp.	0	0	0
Post	Yes	PNAX	2000	Bacalar Chico	2019	8	76	Yes	Merulinidae	Orbicella annularis	0.526316	0.131579	0
Post	Yes	PNAX	2000	Bacalar Chico	2019	8	76	Yes	Merulinidae	Orbicella faveolata	1.05263	0.789474	0
Post	Yes	PNAX	2000	Bacalar Chico	2019	8	76	Yes	Merulinidae	Orbicella franksi	0	0	0
Post	Yes	PNAX	2000	Bacalar Chico	2019	8	76	No	Poritidae	Porites astreoides	13.4211	0.263158	0.131579
Post	Yes	PNAX	2000	Bacalar Chico	2019	8	76	No	Poritidae	Branching Porites	0.131579	0	0
Post	Yes	PNAX	2000	Bacalar Chico	2019	8	76	No	Poritidae	Branching Porites	0	0	0
Post	Yes	PNAX	2000	Bacalar Chico	2019	8	76	No	Poritidae	Branching Porites	0.263158	0	0
Post	Yes	PNAX	2000	Bacalar Chico	2019	8	76	No	Poritidae	Branching Porites	0	0	0
Post	Yes	PNAX	2000	Bacalar Chico	2019	8	76	Yes	Faviinae	Pseudodiploria clivosa	0	0	0
Post	Yes	PNAX	2000	Bacalar Chico	2019	8	76	Yes	Faviinae	Pseudodiploria strigosa	2.10526	0.394737	1.31579
Post	Yes	PNAX	2000	Bacalar Chico	2019	8	76	No	Mussinae	Scolymia spp.	0	0	0
Post	Yes	PNAX	2000	Bacalar Chico	2019	8	76	No	Mussinae	Scolymia spp.	0	0	0
Post	Yes	PNAX	2000	Bacalar Chico	2019	8	76	No	Siderastreidae	Siderastrea radians	0	0	0
Post	Yes	PNAX	2000	Bacalar Chico	2019	8	76	Yes	Siderastreidae	Siderastrea siderea	4.60526	4.47368	1.71053
Post	Yes	PNAX	2000	Bacalar Chico	2019	8	76	No	Scleractinia incertae sedis	Solenastrea bournoni	0	0	0
Post	Yes	PNAX	2000	Bacalar Chico	2019	8	76	No	Astrocoeniidae	Stephanocoenia intersepta	1.84211	0	0
Post	Yes	PNAPM	1998	Bonanza Profundo	2019	7	70	No	Acroporidae	Acropora cervicornis	0.142857	0	0
Post	Yes	PNAPM	1998	Bonanza Profundo	2019	7	70	No	Acroporidae	Acropora palmata	0	0	0
Post	Yes	PNAPM	1998	Bonanza Profundo	2019	7	70	No	Acroporidae	Acropora cervicornis	0	0	0
Post	Yes	PNAPM	1998	Bonanza Profundo	2019	7	70	No	Agariciidae	Agaricia (encrusting)	14.4286	0.428571	0.428571
Post	Yes	PNAPM	1998	Bonanza Profundo	2019	7	70	No	Agariciidae	Agaricia (encrusting)	0	0	0
Post	Yes	PNAPM	1998	Bonanza Profundo	2019	7	70	No	Agariciidae	Agaricia (encrusting)	0	0	0
Post	Yes	PNAPM	1998	Bonanza Profundo	2019	7	70	No	Agariciidae	Agaricia (encrusting)	0.285714	0	0
Post	Yes	PNAPM	1998	Bonanza Profundo	2019	7	70	No	Agariciidae	Agaricia (encrusting)	0	0	0
Post	Yes	PNAPM	1998	Bonanza Profundo	2019	7	70	No	Agariciidae	Agaricia (encrusting)	0	0	0
Post	Yes	PNAPM	1998	Bonanza Profundo	2019	7	70	No	Agariciidae	Agaricia tenuifolia	0	0	0
Post	Yes	PNAPM	1998	Bonanza Profundo	2019	7	70	Yes	Faviinae	Colpophyllia natans	0	0.285714	0.142857
Post	Yes	PNAPM	1998	Bonanza Profundo	2019	7	70	Yes	Meandrinidae	Dendrogyra cylindrus	0	0	0
Post	Yes	PNAPM	1998	Bonanza Profundo	2019	7	70	Yes	Meandrinidae	Dichocoenia stokesi	0	0	0
Post	Yes	PNAPM	1998	Bonanza Profundo	2019	7	70	Yes	Faviinae	Diploria labyrinthiformis	0	0	0.285714
Post	Yes	PNAPM	1998	Bonanza Profundo	2019	7	70	Yes	Meandrinidae	Eusmilia fastigiata	0	0	0
Post	Yes	PNAPM	1998	Bonanza Profundo	2019	7	70	No	Faviinae	Favia fragum	0	0	0
Post	Yes	PNAPM	1998	Bonanza Profundo	2019	7	70	No	Agariciidae	Helioseris cucullata	0.142857	0	0
Post	Yes	PNAPM	1998	Bonanza Profundo	2019	7	70	Yes	Mussinae	Isophyllia spp.	0	0	0
Post	Yes	PNAPM	1998	Bonanza Profundo	2019	7	70	Yes	Mussinae	Isophyllia spp.	0	0	0
Post	Yes	PNAPM	1998	Bonanza Profundo	2019	7	70	Yes	Mussinae	Isophyllia spp.	0	0	0
Post	Yes	PNAPM	1998	Bonanza Profundo	2019	7	70	No	Pocilloporidae	Madracis spp.	0	0	0
Post	Yes	PNAPM	1998	Bonanza Profundo	2019	7	70	No	Pocilloporidae	Madracis spp.	0	0	0
Post	Yes	PNAPM	1998	Bonanza Profundo	2019	7	70	Yes	Meandrinidae	Meandrina spp.	0	0	0
Post	Yes	PNAPM	1998	Bonanza Profundo	2019	7	70	Yes	Meandrinidae	Meandrina spp.	0	0	0.571429
Post	Yes	PNAPM	1998	Bonanza Profundo	2019	7	70	Yes	Meandrinidae	Meandrina spp.	0	0	0
Post	Yes	PNAPM	1998	Bonanza Profundo	2019	7	70	Yes	Montastraeidae	Montastraea cavernosa	2.14286	0	1.14286
Post	Yes	PNAPM	1998	Bonanza Profundo	2019	7	70	No	Mussinae	Mussa angulosa	0	0	0
Post	Yes	PNAPM	1998	Bonanza Profundo	2019	7	70	Yes	Mussinae	Mycetophyllia spp.	0	0	0
Post	Yes	PNAPM	1998	Bonanza Profundo	2019	7	70	Yes	Mussinae	Mycetophyllia spp.	0	0	0
Post	Yes	PNAPM	1998	Bonanza Profundo	2019	7	70	Yes	Mussinae	Mycetophyllia spp.	0	0	0
Post	Yes	PNAPM	1998	Bonanza Profundo	2019	7	70	Yes	Mussinae	Mycetophyllia spp.	0	0	0
Post	Yes	PNAPM	1998	Bonanza Profundo	2019	7	70	Yes	Mussinae	Mycetophyllia spp.	0	0	0
Post	Yes	PNAPM	1998	Bonanza Profundo	2019	7	70	Yes	Merulinidae	Orbicella annularis	0.428571	0	0.142857
Post	Yes	PNAPM	1998	Bonanza Profundo	2019	7	70	Yes	Merulinidae	Orbicella faveolata	0.428571	0.142857	0
Post	Yes	PNAPM	1998	Bonanza Profundo	2019	7	70	Yes	Merulinidae	Orbicella franksi	0.142857	0	0
Post	Yes	PNAPM	1998	Bonanza Profundo	2019	7	70	No	Poritidae	Porites astreoides	4	0	0.142857
Post	Yes	PNAPM	1998	Bonanza Profundo	2019	7	70	No	Poritidae	Branching Porites	0.142857	0	0
Post	Yes	PNAPM	1998	Bonanza Profundo	2019	7	70	No	Poritidae	Branching Porites	0	0	0
Post	Yes	PNAPM	1998	Bonanza Profundo	2019	7	70	No	Poritidae	Branching Porites	0.428571	0	0
Post	Yes	PNAPM	1998	Bonanza Profundo	2019	7	70	No	Poritidae	Branching Porites	0	0	0
Post	Yes	PNAPM	1998	Bonanza Profundo	2019	7	70	Yes	Faviinae	Pseudodiploria clivosa	0	0	0
Post	Yes	PNAPM	1998	Bonanza Profundo	2019	7	70	Yes	Faviinae	Pseudodiploria strigosa	0.428571	0.142857	2.71429
Post	Yes	PNAPM	1998	Bonanza Profundo	2019	7	70	No	Mussinae	Scolymia spp.	0	0	0
Post	Yes	PNAPM	1998	Bonanza Profundo	2019	7	70	No	Mussinae	Scolymia spp.	0	0	0
Post	Yes	PNAPM	1998	Bonanza Profundo	2019	7	70	No	Siderastreidae	Siderastrea radians	0.142857	0	0
Post	Yes	PNAPM	1998	Bonanza Profundo	2019	7	70	Yes	Siderastreidae	Siderastrea siderea	1.42857	0.428571	0.428571
Post	Yes	PNAPM	1998	Bonanza Profundo	2019	7	70	No	Scleractinia incertae sedis	Solenastrea bournoni	0	0	0
Post	Yes	PNAPM	1998	Bonanza Profundo	2019	7	70	No	Astrocoeniidae	Stephanocoenia intersepta	1.28571	0	0
Post	Yes	RBCM	2016	Casa Cenote	2019	7	66	No	Acroporidae	Acropora cervicornis	0.151515	0	0
Post	Yes	RBCM	2016	Casa Cenote	2019	7	66	No	Acroporidae	Acropora palmata	0.606061	0	0
Post	Yes	RBCM	2016	Casa Cenote	2019	7	66	No	Acroporidae	Acropora cervicornis	0	0	0
Post	Yes	RBCM	2016	Casa Cenote	2019	7	66	No	Agariciidae	Agaricia (encrusting)	10.1515	0.151515	0.151515
Post	Yes	RBCM	2016	Casa Cenote	2019	7	66	No	Agariciidae	Agaricia (encrusting)	0	0	0
Post	Yes	RBCM	2016	Casa Cenote	2019	7	66	No	Agariciidae	Agaricia (encrusting)	0	0	0
Post	Yes	RBCM	2016	Casa Cenote	2019	7	66	No	Agariciidae	Agaricia (encrusting)	0.606061	0	0
Post	Yes	RBCM	2016	Casa Cenote	2019	7	66	No	Agariciidae	Agaricia (encrusting)	0	0	0
Post	Yes	RBCM	2016	Casa Cenote	2019	7	66	No	Agariciidae	Agaricia (encrusting)	0	0	0
Post	Yes	RBCM	2016	Casa Cenote	2019	7	66	No	Agariciidae	Agaricia tenuifolia	0.151515	0	0
Post	Yes	RBCM	2016	Casa Cenote	2019	7	66	Yes	Faviinae	Colpophyllia natans	0.151515	0	0.30303
Post	Yes	RBCM	2016	Casa Cenote	2019	7	66	Yes	Meandrinidae	Dendrogyra cylindrus	0	0	0
Post	Yes	RBCM	2016	Casa Cenote	2019	7	66	Yes	Meandrinidae	Dichocoenia stokesi	0	0	0
Post	Yes	RBCM	2016	Casa Cenote	2019	7	66	Yes	Faviinae	Diploria labyrinthiformis	0	0	0
Post	Yes	RBCM	2016	Casa Cenote	2019	7	66	Yes	Meandrinidae	Eusmilia fastigiata	0	0	0
Post	Yes	RBCM	2016	Casa Cenote	2019	7	66	No	Faviinae	Favia fragum	0	0	0
Post	Yes	RBCM	2016	Casa Cenote	2019	7	66	No	Agariciidae	Helioseris cucullata	0.606061	0	0
Post	Yes	RBCM	2016	Casa Cenote	2019	7	66	Yes	Mussinae	Isophyllia spp.	0	0	0
Post	Yes	RBCM	2016	Casa Cenote	2019	7	66	Yes	Mussinae	Isophyllia spp.	0	0	0
Post	Yes	RBCM	2016	Casa Cenote	2019	7	66	Yes	Mussinae	Isophyllia spp.	0	0	0
Post	Yes	RBCM	2016	Casa Cenote	2019	7	66	No	Pocilloporidae	Madracis spp.	0	0	0
Post	Yes	RBCM	2016	Casa Cenote	2019	7	66	No	Pocilloporidae	Madracis spp.	0	0	0
Post	Yes	RBCM	2016	Casa Cenote	2019	7	66	Yes	Meandrinidae	Meandrina spp.	0	0	0
Post	Yes	RBCM	2016	Casa Cenote	2019	7	66	Yes	Meandrinidae	Meandrina spp.	0	0	0
Post	Yes	RBCM	2016	Casa Cenote	2019	7	66	Yes	Meandrinidae	Meandrina spp.	0	0	0
Post	Yes	RBCM	2016	Casa Cenote	2019	7	66	Yes	Montastraeidae	Montastraea cavernosa	1.06061	0	0
Post	Yes	RBCM	2016	Casa Cenote	2019	7	66	No	Mussinae	Mussa angulosa	0	0	0
Post	Yes	RBCM	2016	Casa Cenote	2019	7	66	Yes	Mussinae	Mycetophyllia spp.	0	0	0
Post	Yes	RBCM	2016	Casa Cenote	2019	7	66	Yes	Mussinae	Mycetophyllia spp.	0	0	0
Post	Yes	RBCM	2016	Casa Cenote	2019	7	66	Yes	Mussinae	Mycetophyllia spp.	0	0	0
Post	Yes	RBCM	2016	Casa Cenote	2019	7	66	Yes	Mussinae	Mycetophyllia spp.	0	0	0
Post	Yes	RBCM	2016	Casa Cenote	2019	7	66	Yes	Mussinae	Mycetophyllia spp.	0	0	0
Post	Yes	RBCM	2016	Casa Cenote	2019	7	66	Yes	Merulinidae	Orbicella annularis	0.454545	0.30303	0
Post	Yes	RBCM	2016	Casa Cenote	2019	7	66	Yes	Merulinidae	Orbicella faveolata	2.27273	0	0.30303
Post	Yes	RBCM	2016	Casa Cenote	2019	7	66	Yes	Merulinidae	Orbicella franksi	0.151515	0	0
Post	Yes	RBCM	2016	Casa Cenote	2019	7	66	No	Poritidae	Porites astreoides	8.78788	0	0
Post	Yes	RBCM	2016	Casa Cenote	2019	7	66	No	Poritidae	Branching Porites	0	0	0
Post	Yes	RBCM	2016	Casa Cenote	2019	7	66	No	Poritidae	Branching Porites	0.151515	0	0
Post	Yes	RBCM	2016	Casa Cenote	2019	7	66	No	Poritidae	Branching Porites	3.0303	0	0
Post	Yes	RBCM	2016	Casa Cenote	2019	7	66	No	Poritidae	Branching Porites	0	0	0
Post	Yes	RBCM	2016	Casa Cenote	2019	7	66	Yes	Faviinae	Pseudodiploria clivosa	0	0	0
Post	Yes	RBCM	2016	Casa Cenote	2019	7	66	Yes	Faviinae	Pseudodiploria strigosa	0.606061	0	1.21212
Post	Yes	RBCM	2016	Casa Cenote	2019	7	66	No	Mussinae	Scolymia spp.	0	0	0
Post	Yes	RBCM	2016	Casa Cenote	2019	7	66	No	Mussinae	Scolymia spp.	0	0	0
Post	Yes	RBCM	2016	Casa Cenote	2019	7	66	No	Siderastreidae	Siderastrea radians	0.454545	0	0
Post	Yes	RBCM	2016	Casa Cenote	2019	7	66	Yes	Siderastreidae	Siderastrea siderea	2.57576	0.151515	0
Post	Yes	RBCM	2016	Casa Cenote	2019	7	66	No	Scleractinia incertae sedis	Solenastrea bournoni	0	0	0
Post	Yes	RBCM	2016	Casa Cenote	2019	7	66	No	Astrocoeniidae	Stephanocoenia intersepta	1.21212	0	0
Post	Yes	PNAC	1996	Chankanaab	2019	7	62	No	Acroporidae	Acropora cervicornis	0	0	0
Post	Yes	PNAC	1996	Chankanaab	2019	7	62	No	Acroporidae	Acropora palmata	0	0	0
Post	Yes	PNAC	1996	Chankanaab	2019	7	62	No	Acroporidae	Acropora cervicornis	0	0	0
Post	Yes	PNAC	1996	Chankanaab	2019	7	62	No	Agariciidae	Agaricia (encrusting)	25	1.12903	0.16129
Post	Yes	PNAC	1996	Chankanaab	2019	7	62	No	Agariciidae	Agaricia (encrusting)	0	0	0
Post	Yes	PNAC	1996	Chankanaab	2019	7	62	No	Agariciidae	Agaricia (encrusting)	0	0	0
Post	Yes	PNAC	1996	Chankanaab	2019	7	62	No	Agariciidae	Agaricia (encrusting)	0	0	0
Post	Yes	PNAC	1996	Chankanaab	2019	7	62	No	Agariciidae	Agaricia (encrusting)	0	0	0
Post	Yes	PNAC	1996	Chankanaab	2019	7	62	No	Agariciidae	Agaricia (encrusting)	0	0	0
Post	Yes	PNAC	1996	Chankanaab	2019	7	62	No	Agariciidae	Agaricia tenuifolia	0.16129	0	0
Post	Yes	PNAC	1996	Chankanaab	2019	7	62	Yes	Faviinae	Colpophyllia natans	0	0	0
Post	Yes	PNAC	1996	Chankanaab	2019	7	62	Yes	Meandrinidae	Dendrogyra cylindrus	0	0	0
Post	Yes	PNAC	1996	Chankanaab	2019	7	62	Yes	Meandrinidae	Dichocoenia stokesi	0	0	0.322581
Post	Yes	PNAC	1996	Chankanaab	2019	7	62	Yes	Faviinae	Diploria labyrinthiformis	0	0	0.322581
Post	Yes	PNAC	1996	Chankanaab	2019	7	62	Yes	Meandrinidae	Eusmilia fastigiata	0.806452	0.322581	0.322581
Post	Yes	PNAC	1996	Chankanaab	2019	7	62	No	Faviinae	Favia fragum	0	0	0
Post	Yes	PNAC	1996	Chankanaab	2019	7	62	No	Agariciidae	Helioseris cucullata	0	0	0
Post	Yes	PNAC	1996	Chankanaab	2019	7	62	Yes	Mussinae	Isophyllia spp.	0	0	0
Post	Yes	PNAC	1996	Chankanaab	2019	7	62	Yes	Mussinae	Isophyllia spp.	0	0	0
Post	Yes	PNAC	1996	Chankanaab	2019	7	62	Yes	Mussinae	Isophyllia spp.	0	0	0
Post	Yes	PNAC	1996	Chankanaab	2019	7	62	No	Pocilloporidae	Madracis spp.	0	0	0
Post	Yes	PNAC	1996	Chankanaab	2019	7	62	No	Pocilloporidae	Madracis spp.	0.483871	0	0
Post	Yes	PNAC	1996	Chankanaab	2019	7	62	Yes	Meandrinidae	Meandrina spp.	0	0	0
Post	Yes	PNAC	1996	Chankanaab	2019	7	62	Yes	Meandrinidae	Meandrina spp.	0.16129	0	0.483871
Post	Yes	PNAC	1996	Chankanaab	2019	7	62	Yes	Meandrinidae	Meandrina spp.	0	0	0
Post	Yes	PNAC	1996	Chankanaab	2019	7	62	Yes	Montastraeidae	Montastraea cavernosa	0.806452	0.483871	0.806452
Post	Yes	PNAC	1996	Chankanaab	2019	7	62	No	Mussinae	Mussa angulosa	0	0	0
Post	Yes	PNAC	1996	Chankanaab	2019	7	62	Yes	Mussinae	Mycetophyllia spp.	0	0	0
Post	Yes	PNAC	1996	Chankanaab	2019	7	62	Yes	Mussinae	Mycetophyllia spp.	0	0	0
Post	Yes	PNAC	1996	Chankanaab	2019	7	62	Yes	Mussinae	Mycetophyllia spp.	0	0	0
Post	Yes	PNAC	1996	Chankanaab	2019	7	62	Yes	Mussinae	Mycetophyllia spp.	0	0	0
Post	Yes	PNAC	1996	Chankanaab	2019	7	62	Yes	Mussinae	Mycetophyllia spp.	0	0	0
Post	Yes	PNAC	1996	Chankanaab	2019	7	62	Yes	Merulinidae	Orbicella annularis	0.16129	0	0
Post	Yes	PNAC	1996	Chankanaab	2019	7	62	Yes	Merulinidae	Orbicella faveolata	1.29032	0.322581	0.16129
Post	Yes	PNAC	1996	Chankanaab	2019	7	62	Yes	Merulinidae	Orbicella franksi	0.16129	0	0
Post	Yes	PNAC	1996	Chankanaab	2019	7	62	No	Poritidae	Porites astreoides	13.3871	0	0
Post	Yes	PNAC	1996	Chankanaab	2019	7	62	No	Poritidae	Branching Porites	0.16129	0	0
Post	Yes	PNAC	1996	Chankanaab	2019	7	62	No	Poritidae	Branching Porites	0.16129	0	0
Post	Yes	PNAC	1996	Chankanaab	2019	7	62	No	Poritidae	Branching Porites	0.16129	0	0
Post	Yes	PNAC	1996	Chankanaab	2019	7	62	No	Poritidae	Branching Porites	0	0	0
Post	Yes	PNAC	1996	Chankanaab	2019	7	62	Yes	Faviinae	Pseudodiploria clivosa	0	0	0
Post	Yes	PNAC	1996	Chankanaab	2019	7	62	Yes	Faviinae	Pseudodiploria strigosa	0	0.16129	0
Post	Yes	PNAC	1996	Chankanaab	2019	7	62	No	Mussinae	Scolymia spp.	0	0	0
Post	Yes	PNAC	1996	Chankanaab	2019	7	62	No	Mussinae	Scolymia spp.	0	0	0
Post	Yes	PNAC	1996	Chankanaab	2019	7	62	No	Siderastreidae	Siderastrea radians	0.483871	0	0
Post	Yes	PNAC	1996	Chankanaab	2019	7	62	Yes	Siderastreidae	Siderastrea siderea	8.70968	1.12903	0.322581
Post	Yes	PNAC	1996	Chankanaab	2019	7	62	No	Scleractinia incertae sedis	Solenastrea bournoni	0	0	0
Post	Yes	PNAC	1996	Chankanaab	2019	7	62	No	Astrocoeniidae	Stephanocoenia intersepta	0.16129	0	0
Post	Yes	PNAC	1996	Colombia	2019	8	78	No	Acroporidae	Acropora cervicornis	0	0	0
Post	Yes	PNAC	1996	Colombia	2019	8	78	No	Acroporidae	Acropora palmata	0	0	0
Post	Yes	PNAC	1996	Colombia	2019	8	78	No	Acroporidae	Acropora cervicornis	0	0	0
Post	Yes	PNAC	1996	Colombia	2019	8	78	No	Agariciidae	Agaricia (encrusting)	14.2308	0.897436	1.28205
Post	Yes	PNAC	1996	Colombia	2019	8	78	No	Agariciidae	Agaricia (encrusting)	0	0	0
Post	Yes	PNAC	1996	Colombia	2019	8	78	No	Agariciidae	Agaricia (encrusting)	0	0	0
Post	Yes	PNAC	1996	Colombia	2019	8	78	No	Agariciidae	Agaricia (encrusting)	0	0	0
Post	Yes	PNAC	1996	Colombia	2019	8	78	No	Agariciidae	Agaricia (encrusting)	0	0	0
Post	Yes	PNAC	1996	Colombia	2019	8	78	No	Agariciidae	Agaricia (encrusting)	0	0	0
Post	Yes	PNAC	1996	Colombia	2019	8	78	No	Agariciidae	Agaricia tenuifolia	0.25641	0	0
Post	Yes	PNAC	1996	Colombia	2019	8	78	Yes	Faviinae	Colpophyllia natans	0	0	0.128205
Post	Yes	PNAC	1996	Colombia	2019	8	78	Yes	Meandrinidae	Dendrogyra cylindrus	0	0	0
Post	Yes	PNAC	1996	Colombia	2019	8	78	Yes	Meandrinidae	Dichocoenia stokesi	0	0	0
Post	Yes	PNAC	1996	Colombia	2019	8	78	Yes	Faviinae	Diploria labyrinthiformis	0	0	0
Post	Yes	PNAC	1996	Colombia	2019	8	78	Yes	Meandrinidae	Eusmilia fastigiata	0.384615	0	1.15385
Post	Yes	PNAC	1996	Colombia	2019	8	78	No	Faviinae	Favia fragum	0	0	0
Post	Yes	PNAC	1996	Colombia	2019	8	78	No	Agariciidae	Helioseris cucullata	0	0	0
Post	Yes	PNAC	1996	Colombia	2019	8	78	Yes	Mussinae	Isophyllia spp.	0	0	0
Post	Yes	PNAC	1996	Colombia	2019	8	78	Yes	Mussinae	Isophyllia spp.	0	0	0
Post	Yes	PNAC	1996	Colombia	2019	8	78	Yes	Mussinae	Isophyllia spp.	0	0	0
Post	Yes	PNAC	1996	Colombia	2019	8	78	No	Pocilloporidae	Madracis spp.	0	0	0
Post	Yes	PNAC	1996	Colombia	2019	8	78	No	Pocilloporidae	Madracis spp.	0.512821	0	0
Post	Yes	PNAC	1996	Colombia	2019	8	78	Yes	Meandrinidae	Meandrina spp.	0	0	0
Post	Yes	PNAC	1996	Colombia	2019	8	78	Yes	Meandrinidae	Meandrina spp.	0	0	0
Post	Yes	PNAC	1996	Colombia	2019	8	78	Yes	Meandrinidae	Meandrina spp.	0	0	0
Post	Yes	PNAC	1996	Colombia	2019	8	78	Yes	Montastraeidae	Montastraea cavernosa	0.769231	0	0.512821
Post	Yes	PNAC	1996	Colombia	2019	8	78	No	Mussinae	Mussa angulosa	0	0	0
Post	Yes	PNAC	1996	Colombia	2019	8	78	Yes	Mussinae	Mycetophyllia spp.	0	0	0
Post	Yes	PNAC	1996	Colombia	2019	8	78	Yes	Mussinae	Mycetophyllia spp.	0	0	0
Post	Yes	PNAC	1996	Colombia	2019	8	78	Yes	Mussinae	Mycetophyllia spp.	0	0	0
Post	Yes	PNAC	1996	Colombia	2019	8	78	Yes	Mussinae	Mycetophyllia spp.	0	0	0
Post	Yes	PNAC	1996	Colombia	2019	8	78	Yes	Mussinae	Mycetophyllia spp.	0	0	0
Post	Yes	PNAC	1996	Colombia	2019	8	78	Yes	Merulinidae	Orbicella annularis	0.384615	0.641026	0
Post	Yes	PNAC	1996	Colombia	2019	8	78	Yes	Merulinidae	Orbicella faveolata	2.05128	0	0.25641
Post	Yes	PNAC	1996	Colombia	2019	8	78	Yes	Merulinidae	Orbicella franksi	0.25641	0	0
Post	Yes	PNAC	1996	Colombia	2019	8	78	No	Poritidae	Porites astreoides	3.46154	0	0
Post	Yes	PNAC	1996	Colombia	2019	8	78	No	Poritidae	Branching Porites	1.15385	0	0
Post	Yes	PNAC	1996	Colombia	2019	8	78	No	Poritidae	Branching Porites	0.128205	0	0
Post	Yes	PNAC	1996	Colombia	2019	8	78	No	Poritidae	Branching Porites	6.41026	0	0.128205
Post	Yes	PNAC	1996	Colombia	2019	8	78	No	Poritidae	Branching Porites	0	0	0
Post	Yes	PNAC	1996	Colombia	2019	8	78	Yes	Faviinae	Pseudodiploria clivosa	0	0	0
Post	Yes	PNAC	1996	Colombia	2019	8	78	Yes	Faviinae	Pseudodiploria strigosa	0	0	0.512821
Post	Yes	PNAC	1996	Colombia	2019	8	78	No	Mussinae	Scolymia spp.	0	0	0
Post	Yes	PNAC	1996	Colombia	2019	8	78	No	Mussinae	Scolymia spp.	0	0	0
Post	Yes	PNAC	1996	Colombia	2019	8	78	No	Siderastreidae	Siderastrea radians	0.128205	0	0
Post	Yes	PNAC	1996	Colombia	2019	8	78	Yes	Siderastreidae	Siderastrea siderea	2.94872	0.897436	0.384615
Post	Yes	PNAC	1996	Colombia	2019	8	78	No	Scleractinia incertae sedis	Solenastrea bournoni	0	0	0
Post	Yes	PNAC	1996	Colombia	2019	8	78	No	Astrocoeniidae	Stephanocoenia intersepta	0.897436	0	0
Post	Yes	PNAC	1996	Dalila	2019	7	65	No	Acroporidae	Acropora cervicornis	0	0	0
Post	Yes	PNAC	1996	Dalila	2019	7	65	No	Acroporidae	Acropora palmata	0	0	0
Post	Yes	PNAC	1996	Dalila	2019	7	65	No	Acroporidae	Acropora cervicornis	0	0	0
Post	Yes	PNAC	1996	Dalila	2019	7	65	No	Agariciidae	Agaricia (encrusting)	37.6923	2.92308	0.769231
Post	Yes	PNAC	1996	Dalila	2019	7	65	No	Agariciidae	Agaricia (encrusting)	0	0	0
Post	Yes	PNAC	1996	Dalila	2019	7	65	No	Agariciidae	Agaricia (encrusting)	0	0	0
Post	Yes	PNAC	1996	Dalila	2019	7	65	No	Agariciidae	Agaricia (encrusting)	0	0	0
Post	Yes	PNAC	1996	Dalila	2019	7	65	No	Agariciidae	Agaricia (encrusting)	0	0	0
Post	Yes	PNAC	1996	Dalila	2019	7	65	No	Agariciidae	Agaricia (encrusting)	0	0	0
Post	Yes	PNAC	1996	Dalila	2019	7	65	No	Agariciidae	Agaricia tenuifolia	0.615385	0.923077	0.153846
Post	Yes	PNAC	1996	Dalila	2019	7	65	Yes	Faviinae	Colpophyllia natans	0	0	0
Post	Yes	PNAC	1996	Dalila	2019	7	65	Yes	Meandrinidae	Dendrogyra cylindrus	0	0	0
Post	Yes	PNAC	1996	Dalila	2019	7	65	Yes	Meandrinidae	Dichocoenia stokesi	0.461538	0	0
Post	Yes	PNAC	1996	Dalila	2019	7	65	Yes	Faviinae	Diploria labyrinthiformis	0	0	0
Post	Yes	PNAC	1996	Dalila	2019	7	65	Yes	Meandrinidae	Eusmilia fastigiata	0	0.307692	0.615385
Post	Yes	PNAC	1996	Dalila	2019	7	65	No	Faviinae	Favia fragum	0	0	0
Post	Yes	PNAC	1996	Dalila	2019	7	65	No	Agariciidae	Helioseris cucullata	0.153846	0.153846	0
Post	Yes	PNAC	1996	Dalila	2019	7	65	Yes	Mussinae	Isophyllia spp.	0	0	0
Post	Yes	PNAC	1996	Dalila	2019	7	65	Yes	Mussinae	Isophyllia spp.	0	0	0
Post	Yes	PNAC	1996	Dalila	2019	7	65	Yes	Mussinae	Isophyllia spp.	0	0	0
Post	Yes	PNAC	1996	Dalila	2019	7	65	No	Pocilloporidae	Madracis spp.	0	0	0
Post	Yes	PNAC	1996	Dalila	2019	7	65	No	Pocilloporidae	Madracis spp.	0.307692	0	0
Post	Yes	PNAC	1996	Dalila	2019	7	65	Yes	Meandrinidae	Meandrina spp.	0	0	0
Post	Yes	PNAC	1996	Dalila	2019	7	65	Yes	Meandrinidae	Meandrina spp.	0	0	0.461538
Post	Yes	PNAC	1996	Dalila	2019	7	65	Yes	Meandrinidae	Meandrina spp.	0	0	0
Post	Yes	PNAC	1996	Dalila	2019	7	65	Yes	Montastraeidae	Montastraea cavernosa	1.38462	0.153846	0.153846
Post	Yes	PNAC	1996	Dalila	2019	7	65	No	Mussinae	Mussa angulosa	0	0	0
Post	Yes	PNAC	1996	Dalila	2019	7	65	Yes	Mussinae	Mycetophyllia spp.	0	0	0
Post	Yes	PNAC	1996	Dalila	2019	7	65	Yes	Mussinae	Mycetophyllia spp.	0	0	0
Post	Yes	PNAC	1996	Dalila	2019	7	65	Yes	Mussinae	Mycetophyllia spp.	0	0	0
[truncated: 4,666 more rows]
